## Longitudinal proteomic profiling of high-risk patients with COVID-19 reveals markers of severity and predictors of fatal disease

Jack Gisby<sup>\*1</sup>, Candice L. Clarke<sup>\*1,2</sup>, Nicholas Medjeral-Thomas<sup>\*1,2</sup>, Talat H. Malik<sup>1</sup>, Artemis Papadaki<sup>1</sup>, Paige M. Mortimer<sup>1</sup>, Norzawani B. Buang<sup>1</sup>, Shanice Lewis<sup>1</sup>, Marie Pereira<sup>1</sup>, Frederic Toulza<sup>1</sup>, Ester Fagnano<sup>1</sup>, Marie-Anne Mawhin<sup>1</sup>, Emma E. Dutton<sup>1</sup>, Lunnathaya Tapeng<sup>1</sup>, Paul Kirk<sup>3</sup>, Jacques Behmoaras<sup>1</sup>, Eleanor Sandhu<sup>1,2</sup>, Stephen P. McAdoo<sup>1,2</sup>, Maria F. Prendecki<sup>1,2</sup>, Matthew C. Pickering<sup>1</sup>, Marina Botto<sup>1</sup>, Michelle Willicombe<sup>\*1,2</sup>, David C. Thomas<sup>\*1,2</sup>, James E. Peters<sup>\*1,4</sup>

\* equal contributions

### Author Affiliations

- 1) Centre for Inflammatory Disease, Dept of Immunology and Inflammation, Imperial College London.
- 2) Renal and Transplant Centre, Hammersmith Hospital, Imperial College Healthcare NHS Trust, London, United Kingdom.
- 3) MRC Biostatistics Unit, Forvie Way, University of Cambridge.
- 4) Health Data Research UK, London, UK.

Correspondence to: James E. Peters. Email: [j.peters@imperial.ac.uk](mailto:j.peters@imperial.ac.uk)

## Abstract

End-stage kidney disease (ESKD) patients are at high risk of severe COVID-19. We performed dense serial blood sampling in hospitalised and non-hospitalised ESKD patients with COVID-19 (n=256 samples from 55 patients) and used Olink immunoassays to measure 436 circulating proteins. Comparison to 51 non-infected ESKD patients revealed 221 proteins differentially expressed in COVID-19, of which 69.7% replicated in an independent cohort of 46 COVID-19 patients. 203 proteins were associated with clinical severity scores, including IL6, markers of monocyte recruitment (e.g. CCL2, CCL7), neutrophil activation (e.g. proteinase-3) and epithelial injury (e.g. KRT19). Random Forests machine learning identified predictors of current or future severity such as KRT19, PARP1, PADI2, CCL7, and IL1RL1 (ST2). Survival analysis with joint models revealed 69 predictors of death including IL22RA1, CCL28, and the neutrophil-derived chemotaxin AZU1 (Azurocidin). Finally, longitudinal modelling with linear mixed models uncovered 32 proteins that display different temporal profiles in severe versus non-severe disease, including integrins and adhesion molecules. Our findings point to aberrant innate immune activation and leucocyte-endothelial interactions as central to the pathology of severe COVID-19. The data from this unique cohort of high-risk individuals provide a valuable resource for identifying drug targets in COVID-19.

## Main

Coronavirus disease (COVID-19), caused by the SARS-CoV-2 virus, displays marked clinical heterogeneity from asymptomatic to fatal disease. Patients with severe disease exhibit marked inflammatory responses and immunopathology. The mechanisms underlying this remain incompletely characterised and the key molecular mediators are yet to be determined. To date, the only treatment shown to reduce mortality in randomised trials is dexamethasone [1], a corticosteroid which has broad non-specific effects on the immune system. Even with corticosteroid treatment, mortality in severe COVID-19 remains significant. There is a wide armamentarium of existing drugs that target inflammation more selectively, providing potential repurposing opportunities for the treatment of COVID-19. In order to select the most promising agents for trials, we urgently need to better understand the molecular drivers of severe disease. Proteins are the effector molecules of biology and the targets of most drugs. Therefore, proteomic profiling to identify the key mediators of severe disease provides a valuable tool for identifying and prioritising potential drug targets [2].

Risk factors for severe or fatal COVID-19 include age, male sex, non-European ancestry, obesity, diabetes mellitus, cardiovascular disease, and immunosuppression [3]. End-stage kidney disease (ESKD) is one of the strongest risk factors for severe COVID-19 (estimated hazard ratio for death 3.69) [3], and ESKD patients hospitalised with COVID-19 have a

mortality of approximately 30% [4–7]. ESKD patients have a high prevalence of vascular and cardiometabolic disease (e.g. hypertension, ischaemic heart disease, diabetes), either as a result of the underlying cause of their renal disease and/or as a consequence of renal failure. In addition, ESKD results in both relative immunosuppression and chronic low-grade inflammation, which may impact viral defence and the host inflammatory response.

Here we performed proteomic profiling of serial blood samples of ESKD patients with COVID-19, leveraging the unique opportunity for longitudinal sampling in both the outpatient and inpatient settings afforded by a large multi-ethnic haemodialysis cohort (**Fig. 1a**). These data revealed 221 proteins that are dysregulated in COVID-19 versus matched non-infected ESKD patients. Using linear mixed models, joint models and machine learning, we identified proteins that are markers of COVID-19 severity and risk of death. Finally, we characterised the temporal dynamics of the blood proteomic response during COVID-19 infection in ESKD patients, uncovering 32 proteins that display altered trajectories in patients with severe versus non-severe disease.

## Results

We recruited 55 ESKD patients with COVID-19 (**Supplementary Table 1**). All patients were receiving haemodialysis prior to acquiring COVID-19. Blood samples were taken as soon as feasible following COVID-19 diagnosis. At time of initial sample, 30 patients were outpatients attending haemodialysis sessions and 25 were hospitalised inpatients (**Methods, Fig. 1**). Following the initial blood sample, serial sampling was performed for 51/55 patients. We also recruited 51 non-infected haemodialysis patients as ESKD controls, mirroring the age, sex and ethnicity distribution of the COVID-19 cases (**Extended Fig. 1a-c**). We used the Olink proteomics platform to measure 436 proteins (**Supplementary Table 2**) in 256 plasma samples from the COVID-19 patients and the 51 control samples. The proteins measured consisted of 5 multiplex ‘panels’ focussed on proteins relevant to immuno-inflammation, cardiovascular and cardiometabolic disease. In addition, we assayed 52 serum samples from an independent cohort of 46 COVID-19 positive ESKD patients (‘validation cohort’) (**Methods**).

The Olink platform demonstrated highly consistent measurements in two technical replicates (Pearson’s correlation of 0.999). Principal components analysis (PCA) demonstrated differences between COVID-19 positive cases and controls, although the two groups did not separate into discrete clusters (**Extended Fig. 2**). Categorising samples by either the WHO severity score at time of sampling (**Extended Fig. 2a**) or the patient’s overall clinical course

(measured by peak WHO severity score) (**Extended Fig. 2b**), demonstrated a gradient of COVID-19 severity, best captured by principal components 1 and 3.

#### Proteomic changes triggered by COVID-19

To examine the effects of COVID-19 on the plasma proteome, we performed a differential expression analysis between COVID-19 cases (n=256 samples passing quality control from 55 patients) and non-infected ESKD controls (n=51) using linear mixed models, which account for serial samples from the same individual (**Methods**). This revealed 221 proteins associated with COVID-19 (5% false discovery rate, FDR); the vast majority were upregulated, with only 40 downregulated (**Fig. 2a, Supplementary Table 3**). In order to provide a succinct and standardised nomenclature, we report proteins by the symbols of their encoding genes (see **Supplementary Table 2** for a mapping of symbols to full protein names). The most strongly upregulated proteins (in terms of fold change) were DDX58, CCL7, IL6, CXCL11, KRT19 and CXCL10, and the most strongly downregulated were SERPINA5, CCL16, FABP2, PON3, ITGA11 and MMP12 (**Extended Fig. 3**). Notably, many of the upregulated proteins were chemotaxins. We compared our findings to those of 3 published studies [8–10] and a preprint (**Supplementary Table 4**). 30 of our differentially expressed proteins had been identified in the published papers, and 99 in the preprint. In total 116 had been previously reported.

In the smaller validation cohort (n=52 serum samples from 46 patients with COVID-19; **Methods**), we found 201 proteins that were differentially abundant between cases and controls (5% FDR) (**Supplementary Table 3**). PCA revealed clearer separation of infected and non-infected patients than in the primary cohort, likely reflecting the higher proportion of hospitalised patients (41 of 46 patients) in the validation cohort (**Extended Fig. 4**). Of the 221 differentially abundant proteins from the primary cohort, 150 (69.7%) were also identified in the validation cohort at 5% FDR (**Extended Fig. 5a**). Effect sizes in each dataset showed a strong correlation ( $r=0.804$ , **Extended Fig. 5b**). This demonstrates that our findings are highly reproducible despite differences in sample sizes and blood materials (plasma versus serum in the primary versus validation cohorts, respectively).

#### Proteomic markers of COVID-19 severity and predictors of death

To determine the proteomic effects of COVID-19 severity, we tested for associations between proteins and clinical severity at the time of sampling (defined by WHO severity scores, graded as mild, moderate, severe or critical), using linear mixed models with severity encoded as an ordinal predictor (**Methods**). This analysis revealed 203 proteins associated with severity (**Fig. 2b, Supplementary Table 5**). The majority of these were upregulated in more severe disease, with only 42 down-regulated. Consistent with previous reports, we found that severe COVID-

19 was characterised by elevated IL6. In addition, we observed a signature of upregulated monocyte chemokines (e.g. CCL2, CCL7, CXCL10), neutrophil activation and degranulation (e.g. PRTN3, MPO) and epithelial injury (e.g. KRT19, AREG, PSIP1, GRN). (**Fig. 2b,c, Fig. 3**). SERPINA5 and leptin showed the greatest downregulation as COVID-19 severity increased (**Fig. 2b,c**). 140/203 (69%) of the severity-associated proteins were also identified as differentially abundant in COVID-19 positive versus negative analysis (**Extended Fig. 6a**). Most proteins upregulated in COVID-19 versus non-infected patients were also associated with more severe disease (**Extended Fig. 6b**). However, there were some notable exceptions (eg CCL20, IL17C, OSM) that were strongly associated with severity that not differentially expressed in infected versus non-infected patients. Comparisons to previously reported associations are reported in (**Supplementary Table 6**).

Molecular changes may predate clinical deterioration. Using machine learning approaches, we tested if the proteomic signature of the first blood sample for each patient in our dataset could identify whether the patient either had clinically severe COVID-19 at the time of sampling or would develop severe disease in the future. Whereas differential expression analyses consider each protein marker separately, machine learning techniques allow examination of all proteins concurrently, thus capturing non-linear relationships in the dataset. Using Random Forests, we trained a classifier on the first sample for each COVID-19 patient to predict the overall clinical course, defined by peak WHO severity. For the purposes of this analysis, we binarised clinical course into either WHO mild/moderate or severe/critical. The Random Forests method achieved 71.3% accuracy in predicting peak severity. Since the features selected by the classifier can highlight proteins of biological importance, we interrogated the model to identify key proteins by calculating feature importance metrics (**Methods, Supplementary Table 7**). The most important proteins in indicating the presence of current or future severe disease were KRT19, PARP1, PADI2, CCL7, IL1RL1 (ST2) and CTSL (Procathepsin L) (**Fig. 4a**).

9/55 patients in the primary cohort died. We therefore sought to identify proteins associated with risk of death. To utilise the dynamic nature of repeated protein measurements for prediction of death, we utilised joint models, which combine linear mixed models and Cox proportional hazards models [11,12] (**Methods**). This analysis identified 44 proteins for which increased concentration was associated with increased risk of death (**Fig. 4b, Supplementary Table 8**), including CST3, IL22RA1, AZU1, CCL28 and SPON1, and 25 proteins for which increased concentration was associated with reduced risk of death, including CD84, TNFSF12, TANK, PRKCQ and ADM.

### Associations with clinical laboratory tests

A number of routine clinical laboratory tests have well characterised associations with COVID-19 (e.g. elevated inflammatory markers, d-dimer and reduced lymphocyte count) [13]. We therefore compared our proteomic data at each timepoint to contemporaneous clinical laboratory measurements using linear mixed models (**Methods**). We found associations between plasma proteins and all clinical measurements except troponin (**Extended Fig. 7, Supplementary Table 9**). Many of these proteins were also markers of severity (e.g. IL6, KRT19, IFN-gamma and CXCL10 were strongly associated with raised CRP and ferritin and reduced lymphocyte counts). Of note CCL7, a monocyte chemokine which was also identified as an important marker of severity by the Random Forests classifier, was associated with lower monocyte count and raised inflammatory markers. Elevated neutrophil count was associated with Oncostatin-M, which regulates IL6, GCSF and GMCSF production, and with the proteases MMP9 and defensin.

### Longitudinal analysis reveals proteins with distinct temporal profiles according to severity

The immune response to infection is dynamic, and therefore snapshot measurements provide only partial insights. Leveraging the dense serial sampling in our dataset (**Fig. 1**), we modelled the temporal trajectory of each protein and asked whether or not any protein trajectories differed in patients with a severe/critical versus mild/moderate overall clinical course. This was achieved using linear mixed models with a time x severity interaction term (**Methods**). Using this approach, we identified 32 proteins for which there was significant interaction between time and severity, i.e. differential temporal trajectories between mild/moderate and severe/critical infections (**Supplementary Table 10, Fig. 5**). Among the proteins with the strongest differences according to clinical course were the integrins ITGA11 and ITGB6, the adhesion molecule ICAM1, TNFRSF10B (a receptor for TRAIL) and PLAUR, the receptor for urokinase plasminogen activator. Most of these proteins exhibited rising profiles in the more severe patients but flat profiles in milder cases. ACE2, the receptor for SARS-CoV-2, and S100A12 also displayed this pattern (**Fig. 5**). In contrast, abundance of ITGA11, which was also identified as reduced in the analysis of infected versus non-infected patients, fell over time in the severe group.

## **Discussion**

Our longitudinal proteomic analysis of ESKD patients with COVID-19 has shown that patients with a trajectory towards severe clinical deterioration exhibit dynamic proteomic changes consistent with activation of the endothelium associated with integrin-mediated cell adhesion abnormalities. The analysis of this unique population of high-risk patients demonstrates that in addition of the well-known IL-6 mediated pro-inflammatory responses, severe disease is

associated with dysregulation of epithelial tissue repair pathways (e.g. KRT19, PSIP1, AREG, GRN (progranulin), ITGA11), most likely a reflection of the lung and vascular damage. Our study thus puts emphasis on the importance of studying and targeting mechanisms that reduce the endothelial damage to both alleviate the severity of the infection and to reduce the chance of long-lasting complications.

ESKD is one of the strongest risk factors for death from COVID-19. In part, this likely reflects the fact that ESKD patients are enriched for cardiometabolic traits that predispose to severe COVID-19. However, in multivariable analyses adjusting for these factors, ESKD remains an independent risk factor for severe COVID-19 [3]. Moreover, there is an inverse relationship between renal function and risk of death from COVID-19 across the spectrum of chronic kidney disease. These observations support the notion that the state of ESKD *per se* is an important determinant of outcome in COVID-19. ESKD is well recognised as an immunosuppressed state [14–16], with defects in both innate and adaptive immunity [17–20]. Accordingly, ESKD confers increased vulnerability to viral infections including influenza and respiratory syncytial virus [21–24]. In addition, ESKD results in a chronic low-grade inflammatory state [25]. This tendency to a pro-inflammatory state, combined with reduced ability to respond to viruses, may contribute to the abnormal host response to SARS-CoV-2 infection, producing the immunopathology that leads to severe COVID-19.

Analysis of ESKD patients with or without COVID-19 revealed many proteins associated with both the presence of COVID-19 and with disease severity. 140 of these associations were common to both analyses. Members of the CCL and CXCL chemokine family featured prominently, for example CCL2 and CCL7, which are both chemokines for monocytes. Interesting these chemokines were negatively correlated with monocyte counts, suggesting recruitment of these innate cells into damaged tissues or ‘exhaustion’. Consistent with the latter, flow cytometric analyses in COVID-19 have shown evidence of phenotypic changes in the circulating monocytes such as expression of cell proliferation markers that occurs when there is premature release of monocytes from the marrow due to an emergency myelopoiesis [26]. In agreement with previous studies [10,27], CXCL10, a chemokine secreted in response to IFN-gamma, was elevated in COVID-19 patients and correlated with severity. DDX58 and IL6 were also among the most strongly upregulated proteins in COVID-19 positive patients and correlated with disease severity, demonstrating the presence of similar immune responses to the ones seen in non-ESKD COVID-19 patients [27]. Of note, the neutrophil proteases PRTN3 and MPO (**Fig. 3**), and the neutrophil-derived protein AZU1, a chemotaxin for monocytes and fibroblasts, were associated with severe disease (**Supplementary Table 5**), and AZU1 was one of the strongest predictors of death, indicating that neutrophil activation

and degranulation are features of severe COVID-19. Together, these chemokines, inflammatory mediators and neutrophil proteins point to an important role for monocyte recruitment and innate immune activation.

Association of IL6 with severe disease is well-established and has already received considerable attention and discussion [28,29]. Despite promising initial case reports of IL6R receptor blockade in COVID-19, convincing efficacy has not so far been demonstrated in randomised trials [30]. One explanation for this is that elevated IL6 is a downstream read-out rather than a primary driver of pathology. Alternatively, blocking IL6 signalling may be necessary but not sufficient to stop immunopathology. Interestingly, despite the association of IL6 with severity in our cross-sectional analysis, we did not identify a significant interaction between time and severity in our longitudinal analysis.

Several proteins associated with risk of death lie in pathways targeted by existing drugs. PARP1 was identified as an important marker of current or future severe COVID-19 by the Random Forests supervise learning method, and also was associated with risk of death. PARP1 inhibitors are in use for cancer [31]. PARP1 has also been associated with inflammatory and vascular disease [32]. While we cannot determine whether the association we observed is causal or simply reflects increased cell death, our data suggest that repurposing of PARP1 inhibition in COVID-19 should be explored further. IL22RA1 was also predictive of death. This protein forms part of the receptor complex for IL22, enabling downstream signalling via JAK/STAT pathways. JAK/STAT inhibitors are in clinical use for rheumatoid arthritis and are being trialled in COVID-19 [33].

The host immune response to COVID-19 is a dynamic process, and clinical deterioration typically occurs 7-10 days after first symptoms. This underlines the importance of longitudinal analysis of serial samples rather than single snapshot measurements. By modelling temporal trajectories, we identified proteins that exhibit distinct temporal profiles in severe versus mild cases. One such protein was S100A12 (EN-RAGE) (**Fig. 5**). This protein was identified as associated with COVID-19 severity in another study also using Olink assays [10]. Interestingly, this protein is also associated with Kawasaki disease [34], a form of paediatric vasculitis with clinical similarities to a COVID-19-associated hyperinflammatory syndrome in children [35]. IL1-beta has been shown to be a driver of S100A12-induced sterile inflammation and activation of endothelial cells [36]. This provides support for the suggestion of targeting IL1-beta with Canakinumab in COVID-19 [37]. Other examples include the adhesion molecules ITGB6 and ICAM1, highlighting the role of leucocyte-endothelial interactions in severe COVID-19. Microvascular thrombosis is a key feature in the pathology of COVID-19, likely that this is



driven by endothelial activation due to viral infection, effectively producing vasculitis. Currently, management of microthrombosis consists of anticoagulation. Our results suggest that disrupting leucocyte-endothelial interactions may be a complementary therapeutic strategy. Complement activation is associated with severe COVID-19 and may contribute to thrombo-inflammation in dialysis patients. We have previously demonstrated elevated complement activation markers, C3a and C5a, in ESKD patients with severe COVID-19 [38]. In our present analysis, complement factor H-related protein 5 (CFHR5), a protein that can increase surface complement activation [39] displayed a rising trajectory in severe disease (**Fig. 5**). Complement C5 inhibition is under investigation in the treatment of severe COVID-19 infection [33,40] and our findings support this approach. An intriguing association is the prominence of KRT19 in our analyses and a pre-print [27] (**Supplementary Table 4,6**). KRT19 is an intermediate filament protein, important for the structural integrity of epithelial cells [41]. Strikingly, evaluation of its expression in the immune system (immgen.org) shows it to be almost exclusively expressed in alveolar macrophages and this may be worthy of further investigation.

Other groups have studied the plasma or serum proteome in COVID-19 [8–10] using either mass spectrometry or immunoassays including the Olink platform. We observed greater similarities with other studies that used immunoassays [9,10,27], including the associations between severity and leucocyte chemokines (**Supplementary Tables 4,6**). However, we observed very little overlap with the mass spectrometry study of Shen et al [8]. This may reflect the lack of commonality in terms of proteins assayed. Mass spectrometry is less sensitive than immunoassays and so is unlikely to capture the cytokines studied here, and conversely is likely to measure many proteins that our immunoassays did not target. However, consistent with their data, we did observe increased von Willebrand factor and reduced apolipoprotein M in more severe disease.

Our study had a number of strengths in comparison to other studies. Many previous studies of COVID-19 have been limited to hospitalised cohorts and lack serial sampling. Consequently, they fail to capture either the full spectrum disease or its temporal evolution. In contrast, we were able to perform serial blood sampling in both the outpatient and inpatient setting, including longitudinal samples from the same individual before and after hospitalisation. This was possible because haemodialysis patients are unable to fully isolate as they must continue to attend for regular dialysis sessions. Another strength of our study was careful matching of ESKD control patients in terms of age, sex and ethnicity (**Extended Fig. 1a-c**) and the large proportion of black, asian and minority ethnic (BAME) patients who are disproportionately affected by COVID-19. Finally, we ensured appropriate statistical

analysis of longitudinal data using linear mixed models and joint models. However, a limitation of our study was that we used Olink panels that measured specific proteins selected on their relevance to inflammation, immunity, cardiovascular and metabolic disease. This bias precluded formal pathway enrichment analysis.

In summary, this study reveals proteins associated with COVID-19 infection and severity, and demonstrates altered dynamic profiles between patients with severe disease and those with a more indolent course. These data provide a valuable resource for therapeutic target prioritisation.

## Online Methods

### Subjects and samples

*Ethical approval:* All participants (patients and controls) were recruited from the Imperial College Renal and Transplant Centre and its satellite dialysis units, London, and provided written informed consent prior to participation. Study ethics were reviewed by the UK National Health Service (NHS) Health Research Authority (HRA) and Health and Care Research Wales (HCRW) Research Ethics Committee (reference 20/WA/0123: The impact of COVID-19 on patients with renal disease and immunosuppressed patients). Ethical approval was given.

*Primary cohort:* We recruited 55 COVID-19 positive haemodialysis patients, either as outpatients or as inpatients (**Supplementary Table 1**). All patients were receiving chronic hospital-based outpatient haemodialysis prior to COVID-19 diagnosis. COVID-19 was confirmed in all cases with positive nasal PCR for the SARS-CoV-2 virus. Blood was collected in EDTA tubes and centrifuged to obtain plasma, and stored at  $-80^{\circ}\text{C}$ . Sample processing was performed within 4 hours of venepuncture. The initial sample was taken as an outpatient for 30 patients and as an inpatient for 25. Where feasible, serial blood samples were taken. In total, 259 samples were taken (3 subsequently failed QC – see below). The median number of serial samples was 5 (range 1-10) (**Extended Fig. 1d**). 8 patients who were recruited as outpatients were subsequently admitted to hospital with COVID-19 over the course of the study. 27 of 55 (49.1%) patients had severe or critical disease (defined by peak WHO severity). 9 (16.4%) patients died.

In addition, we recruited 51 COVID-19 negative haemodialysis controls. COVID-19 negative haemodialysis controls were selected to mirror the cases in terms of demographic features (age, sex, ethnicity) (**Extended Fig. 1a-c**).

*Validation cohort:* We also recruited an independent cohort of 46 COVID-19 positive haemodialysis patients. 5 were outpatients and 41 were inpatients. 33 of 46 patients (71.7%) had severe or critical disease (by peak WHO severity), and 9 (19.6%) patients died. For these patients, blood was collected in serum tubes and centrifuged to obtain serum. Plasma was not collected from these patients. For 40 patients, only one sample from a single timepoint was collected, and for 6 patients, 2 samples were collected. To provide controls, we used serum samples from 11 non-infected ESKD patients (collected at the same time as plasma from a subset of the ESKD control group described above).

### Clinical severity scores

Severity scoring was performed based on WHO classifications (WHO clinical management of COVID-19: Interim guidance 27 May 2020) adapted for clinical data available from electronic medical records. ‘Mild’ was defined as COVID-19 symptoms but no evidence of pneumonia and no hypoxia. ‘Moderate’ was defined as symptoms of pneumonia or hypoxia with oxygen saturation (SaO<sub>2</sub>) greater than 92% on air, or an oxygen requirement no greater than 4L/min. ‘Severe’ was defined as SaO<sub>2</sub> less than 92% on air, or respiratory rate more than 30 per minute, or oxygen requirement more than 4L/min. ‘Critical’ was defined as organ dysfunction or shock or need for high dependency or intensive care support (i.e. the need for non-invasive ventilation or intubation). Severity scores were charted throughout a patient’s illness. We defined the overall severity/clinical course for each patient as the peak severity score that occurred during the patient’s illness.

### Proteomic assays

Plasma and serum proteomic measurements were performed using Olink proximity extension immunoassays (<https://www.olink.com/products/>). Five 92-protein multiplex Olink panels were run (‘inflammation’, ‘immune response’, ‘cardiometabolic’, ‘cardiovascular 2’ and ‘cardiovascular 3’), resulting in 460 measurements per sample. Since a small number of proteins were measured on more than one panel, we measured a total of 436 unique proteins. The Olink assays were run using 88 samples/plate. All plates were run in a single batch. Plate layouts was carefully designed to avoid confounding of potential plate effects with biological or clinical variables of interest. To achieve this, we used an experimental design that combined ensuring case/control balance across plates with random selection of samples from each category and random ordering of allocation to wells. This is outlined in more detail as follows. We ensured that each plate contained a mixture of control and case samples. Specifically, a fixed proportion of each plate was designated for control samples. The allocation of specific control samples to each plate was performed using randomisation. For the case samples, we again used randomisation for plate assignment, with the constraint that once one sample from

a given patient was allocated to a plate, all other longitudinal samples from that patient were assigned to same plate. Finally, once all the samples had been allocated to plates, the layout of samples within each plate was determined through a further randomisation step for well allocation.

#### Normalisation and quality assessment and control

The data was normalised using standard Olink workflows to produce relative protein abundance on a log<sub>2</sub> scale ('NPX'). Quality assessment was performed by a) examination of Olink internal controls, and b) inspection of boxplots, relative log expression (RLE) plots [42] and PCA. Following these steps, 3 poor quality samples were removed. In addition, 5 samples failed quality control on a single proteomic panel only, with the remaining panels passing QC. For these samples, proteins on the panel that failed QC were set to missing, and the data for the remaining proteins was retained.

Principle components analysis revealed no plate effects (**Extended Fig. 8a**). One serum sample was assayed twice as a technical replicate to assess assay performance (**Extended Fig. 8b**). We found a Pearson's correlation between the samples of 0.999. 13 proteins were assayed more than once due to their inclusion in multiple Olink panels. For plasma, the median correlation between the assays was 0.986 with an IQR of 0.019 and a range of 0.925 to 0.998. For serum, the median correlation between the assays was 0.991 with an IQR of 0.043 and a range of 0.737 to 0.999. We removed duplicate assays at random prior to subsequent analyses.

For 11 ESKD controls, we had contemporaneous plasma and serum samples. To assess the comparability of these two matrices, we fit a linear model to compare duplicate measurements, finding low bias (slope = 0.985) and a high Pearson's correlation of 0.957 (**Extended Fig. 8c**).

#### Missing values

Following QC, 0.22% data points were missing for the plasma dataset and 0.35% for the serum dataset. For analyses that required no missing values (PCA and supervised learning), we imputed missing values as follows. The dataset was first scaled and centred, and missing values imputed using caret's k-nearest neighbours (kNN) method [43]. The 5 closest samples (by Euclidean distance) were used to estimate each missing value.

#### Differential abundance analysis

Differential protein abundance analyses between COVID-19 positive and negative samples were performed using linear mixed models, to account for the use of serial samples from the

same individuals (R lme4 package [44]). This analysis compared 256 samples from 55 COVID-19 patients with 51 non-infected patients (1 sample per non-infected patients). Age, sex and ethnicity were included as covariates. We used a random intercept term to estimate the variability between individuals in the study and account for repeated measures. The regression model in R notation was:

$$\text{NPX} \sim \text{covid\_status} + \text{sex} + \text{age} + \text{ethnicity} + (1 \mid \text{individual})$$

Where NPX represents the protein abundance and covid\_status was a categorical variable (infected/non-infected). Sex and ethnicity were also categorical variables. Age was a quantitative variable. We calculated P values using a type 3 F test in conjunction with Satterthwaite's method for estimating the degrees of freedom for fixed effects [45]. The regression model was fitted for each of the 436 proteins individually. Multiple testing correction was performed using the Benjamini-Hochberg method and a 5% FDR used for the significance threshold.

The same approach was used for the validation cohort. This analysis comprised 52 serum samples from 46 COVID-19 positive patients versus 11 samples from non-infected patient samples (1 sample per non-infected patient).

For testing the association of plasma proteins with the 4-level WHO severity rating (mild, moderate, severe and critical) within COVID-19 positive cases (n=256 samples from 55 patients), we used a similar linear mixed modelling approach. For this analysis, the covid\_status term was replaced by a severity variable encoded using orthogonal polynomial contrasts to account for ordinal nature of severity levels.

The linear mixed modelling strategy was also employed for testing association of temporal clinical laboratory variables and protein levels, with the value of the clinical variable (as a quantitative trait) used in place of covid\_status. Contemporaneous lab measurements were not available for all samples. This varied according to the clinical lab parameter. Some (eg troponin, d-dimer) were measured less frequently than full blood count and CRP. Details of the proportion of missing values for each lab parameter are included in (**Supplementary Table 9**).

#### Supervised learning

Random forest models were fit using R's randomForest and caret packages [43,46]. Data was centred, scaled and imputed as in *Data Preparation* with the caveat that, during cross-validation, the pre-processing procedure was first applied on the resampled (training) data

before the same method was applied without re-calculation to the holdout (test) set. To estimate model accuracy, cross-validation was carried out with 70% of the data in the training set for 10 resampling iterations; the training set was re-shuffled and the cross-validation procedure repeated 10 times. The model's parameters were kept constant at 500 trees and an mtry value (number of proteins randomly sampled as candidates at each node) calculated as the square root of the number of features. After parameter estimation, we fit a final model trained using the entirety of the dataset. This model was used for subsequent feature extraction. Random forest feature extraction was carried out using the R randomForestExplainer package [47]. We made use of the following importance measures: accuracy decrease (the average decrease in prediction accuracy upon swapping out a feature), number of trees (the number of trees with a node corresponding to a feature) and mean minimal depth (the average depth at which a node corresponding to a feature occurs).

#### Survival analysis using joint modelling

Following scaling and centering, we fit linear mixed models for each protein to capture the temporal trajectories of each individual. As previously, a polynomial spline of degree 2 was used to model protein concentration with respect to time. We estimated both random intercepts and random slopes for each individual.

$$\text{NPX} \sim \text{time} + (\text{time} \mid \text{individual})$$

These were joined to a Cox regression model using the jointModel package [12] in order to estimate the association of each protein with risk for death. P values were calculated using a Wald test for the association between the linear mixed model and Cox regression. FDR adjustment was applied, with 5% used as the significance threshold.

#### Longitudinal analysis

We also used linear mixed models to estimate the temporal profile of each protein. We tested whether patients with severe disease had different temporal protein profiles from those with non-severe disease. For the purposes of this analysis, we binarised patients into severe or non-severe according to the peak WHO severity disease of their illness. Patients with a peak WHO score of mild or moderate were considered non-severe and those with a peak score of severe or critical were considered severe. We then used R's bs function to fit a polynomial spline of degree 2 to model protein concentration with respect to the interaction between time (from symptom onset, measured in days) and disease severity (severe or non-severe) [48]. We estimated random slopes with respect to time, in addition to random intercepts, to account for each individual's unique disease course. For each protein, we fitted the following model (R notation:)

NPX ~ time \* severity + sex + age + ethnicity + (time | individual)

To identify proteins with distinct temporal profiles between severe and non-severe cases, we examined the P values for the time x severity interaction term. P-values were adjusted for the multiple proteins tested using the Benjamini-Hochberg method. 5% FDR used as the significance threshold.

### Data availability statement

Individual-level proteomic and clinical phenotyping data are available as Source Data Files 1-4.

**Code availability:** code is available in the following GitHub repository:

[https://github.com/jackgisby/longitudinal\\_olink\\_proteomics](https://github.com/jackgisby/longitudinal_olink_proteomics)

**Competing interests:** The authors declare no competing interests

### Author contributions:

Conceived and designed the study: MCP, MB, MW, DCT, JEP.

Patient recruitment and sample collection: CLC, NM-T, ES, SPM, MFP, MW, DCT.

Led and coordinated patient recruitment: MW.

Sample processing: THM, PMM, NBB, SL, MP, FT, EF, M-A M, ED, LT, MB.

Clinical phenotyping: CLC, NM-T, SL, ES, MFP, MCP, JEP.

Data analysis: JG, AP.

Supervised the analysis: JEP.

Statistical support: PK.

Wrote the paper: JG, JEP

Results interpretation and editing the paper: MB, MCP, DT, JB.

All authors critically reviewed and approved the manuscript before submission.

### Acknowledgements

The authors thank the patients who volunteered for this study and the staff at Imperial College Healthcare NHS Trust (the Imperial College Healthcare NHS Trust renal COVID-19 group and dialysis staff):

Appelbe M, Ashby DR, Brown EA, Cairns T, Charif R, Condon M, Corbett RW, Duncan N, Edwards C, Frankel A, Griffith M, Harris S, Hill P, Kousios A, Levy JB, Loucaidou M, Lightstone L, Liu L, Lucisano G, Lynch K, Mclean A, Moabi D, Muthusamy A, Nevin M, Palmer A, Parsons D, Prout V, Salisbury E, Smith C, Tam F, Tanna A, Tansey K, Tomlinson J, Webster P.

We also acknowledge the efforts of renal specialist doctors in training for assistance with recruiting patients to this study.

We also thank:

- Hari and Rachna Murgai and Milan and Rishi Khosla for generous support with sample transport.
- Dr Kerry Rostron for exceptional support with laboratory facilities in challenging circumstances and the Department administrators for their help.
- Dr Brian Tom and Dr Jessica Barrett (MRC Biostatistics Unit, University of Cambridge) for statistical advice.
- Dr Arianne Richard (University of Cambridge) for critical feedback on the manuscript.

## Funding statement

This research was partly funded by Community Jameel and the Imperial President's Excellence Fund and by a UKRI-DHSC COVID-19 Rapid Response Rolling Call (MR/V027638/1) (to JEP). We also acknowledge a contribution from UKRI/NIHR through the UK Coronavirus Immunology Consortium (UK-CIC) and the National Institute for Health Research (NIHR) Biomedical Research Centre based at Imperial College Healthcare NHS Trust and Imperial College London. The views expressed are those of the author(s) and not necessarily those of the NHS, the NIHR or the Department of Health. JEP is supported by UKRI Innovation Fellowship at Health Data Research UK (MR/S004068/2). DCT is funded by a Stage 2 Wellcome-Beit Prize Clinical Research Career Development Fellowship (20661206617/A/17/Z and 206617/A/17/A). MCP is a Wellcome Trust Senior Fellow in Clinical Science (212252/Z/18/Z). NM-T and ES are supported by Wellcome Trust and Imperial College London Research Fellowships, and CLC by an Auchi Clinical Research Fellowship.

## References

- [1] Horby P, Lim WS, Emberson J, Mafham M, Bell J, Linsell L, et al. Effect of Dexamethasone in Hospitalized Patients with COVID-19: Preliminary Report. medRxiv [Internet]. 2020;2020.06.22.20137273. Available from: <https://www.medrxiv.org/content/10.1101/2020.06.22.20137273v1>
- [2] Suhre K, McCarthy MI, Schwenk JM. Genetics meets proteomics: perspectives for large population-based studies. *Nat Rev Genet*. 2020 Aug;
- [3] Williamson EJ, Walker AJ, Bhaskaran K, Bacon S, Bates C, Morton CE, et al. OpenSAFELY: factors associated with COVID-19 death in 17 million patients. *Nature* [Internet]. 2020;584(August). Available from: <http://dx.doi.org/10.1038/s41586-020-2521-4>
- [4] Docherty AB, Harrison EM, Green CA, Hardwick HE, Pius R, Norman L, et al. Features of 16,749 hospitalised UK patients with COVID-19 using the ISARIC WHO Clinical Characterisation Protocol. medRxiv [Internet]. 2020;2020.04.23.20076042. Available from: <https://www.medrxiv.org/content/10.1101/2020.04.23.20076042v1>
- [5] Corbett RW, Blakey S, Nitsch D, Loucaidou M, McLean A, Duncan N, et al. Epidemiology of COVID-19 in an Urban Dialysis Center. *J Am Soc Nephrol*. 2020;31(8):1815–23.
- [6] Ng JH, Hirsch JS, Wanchoo R, Sachdeva M, Sakhiya V, Hong S, et al. Outcomes of patients with end-stage kidney disease hospitalized with COVID-19. *Kidney Int* [Internet]. 2020 Aug;(January):19–21. Available from: <https://www.medrxiv.org/content/10.1101/2020.04.23.20076042v1>
- [7] Valeri AM, Robbins-Juarez SY, Stevens JS, Ahn W, Rao MK, Radhakrishnan J, et al. Presentation and outcomes of patients with ESKD and COVID-19. *J Am Soc Nephrol*. 2020;31(7):1409–15.
- [8] Shen B, Yi X, Sun Y, Bi X, Du J, Zhang C, et al. Proteomic and Metabolomic Characterization of COVID-19 Patient Sera. *Cell* [Internet]. 2020;182(1):59-72.e15. Available from: <https://www.ncbi.nlm.nih.gov/pmc/articles/PMC7254001/pdf/main.pdf>
- [9] Lucas C, Wong P, Klein J, Castro TBR, Silva J, Sundaram M, et al. Longitudinal analyses reveal immunological misfiring in severe COVID-19. *Nature*. 2020;
- [10] Arunachalam PS, Wimmers F, Mok CKP, Perera RAPM, Scott M, Hagan T, et al. Systems biological assessment of immunity to mild versus severe COVID-19 infection



- in humans. *Science* [Internet]. 2020 Sep;6261(August):1–18. Available from: <http://www.ncbi.nlm.nih.gov/pubmed/32788292>
- [11] Ibrahim JG, Chu H, Chen LM. Basic concepts and methods for joint models of longitudinal and survival data. *J Clin Oncol Off J Am Soc Clin Oncol*. 2010 Jun;28(16):2796–801.
- [12] Rizopoulos D. JM: An R package for the joint modelling of longitudinal and time-to-event data. *J Stat Softw*. 2010;35(9):1–33.
- [13] Guan W, Ni Z, Hu Y, Liang W, Ou C, He J, et al. Clinical characteristics of coronavirus disease 2019 in China. *N Engl J Med*. 2020;382(18):1708–20.
- [14] Eiselt J, Kielberger L, Rajdl D, Racek J, Pazdiora P, Malánová L. Previous Vaccination and Age are More Important Predictors of Immune Response to Influenza Vaccine than Inflammation and Iron Status in Dialysis Patients. *Kidney Blood Press Res*. 2016;41(2):139–47.
- [15] Girndt M, Sester U, Sester M, Kaul H, Köhler H. Impaired cellular immune function in patients with end-stage renal failure. Vol. 14, *Nephrology, dialysis, transplantation : official publication of the European Dialysis and Transplant Association - European Renal Association*. England; 1999. p. 2807–10.
- [16] Sarnak MJ, Jaber BL. Mortality caused by sepsis in patients with end-stage renal disease compared with the general population. *Kidney Int*. 2000 Oct;58(4):1758–64.
- [17] Alexiewicz JM, Smogorzewski M, Fadda GZ, Massry SG. Impaired phagocytosis in dialysis patients: studies on mechanisms. *Am J Nephrol*. 1991;11(2):102–11.
- [18] Massry S, Smogorzewski M. Dysfunction of polymorphonuclear leukocytes in uremia: role of parathyroid hormone. *Kidney Int Suppl*. 2001 Feb;78:S195-6.
- [19] Girndt M, Sester M, Sester U, Kaul H, Köhler H. Molecular aspects of T- and B-cell function in uremia. *Kidney Int Suppl*. 2001 Feb;78:S206-11.
- [20] Meier P, Dayer E, Blanc E, Wauters J-P. Early T cell activation correlates with expression of apoptosis markers in patients with end-stage renal disease. *J Am Soc Nephrol*. 2002 Jan;13(1):204–12.
- [21] Betjes MGH. Immune cell dysfunction and inflammation in end-stage renal disease. *Nat Rev Nephrol*. 2013 May;9(5):255–65.
- [22] Boattini M, Almeida A, Christaki E, Cruz L, Antão D, Moreira MI, et al. Influenza and respiratory syncytial virus infections in the oldest-old continent. *Eur J Clin Microbiol Infect Dis Off Publ Eur Soc Clin Microbiol*. 2020 Nov;39(11):2085–90.
- [23] Prasad N, Walker TA, Waite B, Wood T, Trenholme AA, Baker MG, et al. Respiratory syncytial virus associated hospitalizations among adults with chronic medical conditions. *Clin Infect Dis an Off Publ Infect Dis Soc Am*. 2020 Jun;
- [24] Usvyat LA, Carter M, Thijssen S, Kooman JP, van der Sande FM, Zabetakis P, et al. Seasonal variations in mortality, clinical, and laboratory parameters in hemodialysis patients: a 5-year cohort study. *Clin J Am Soc Nephrol*. 2012 Jan;7(1):108–15.
- [25] Carrero JJ, Stenvinkel P. Inflammation in end-stage renal disease--what have we learned in 10 years? *Semin Dial*. 2010;23(5):498–509.
- [26] Mann ER, Menon M, Knight SB, Konkell JE, Jagger C, Shaw TN, et al. Longitudinal immune profiling reveals distinct features of COVID-19 pathogenesis. *medRxiv* [Internet]. 2020 Jan 1;2020.06.13.20127605. Available from: <http://medrxiv.org/content/early/2020/06/16/2020.06.13.20127605.abstract>

- [27] Huang J. Comparing biomarkers for COVID-19 disease with commonly associated preexisting conditions and complications. medRxiv [Internet]. 2020 Jan 1;2020.10.02.20205609. Available from: <http://medrxiv.org/content/early/2020/10/05/2020.10.02.20205609.abstract>
- [28] Wu C, Chen X, Cai Y, Xia J, Zhou X, Xu S, et al. Risk Factors Associated With Acute Respiratory Distress Syndrome and Death in Patients With Coronavirus Disease 2019 Pneumonia in Wuhan, China. *JAMA Intern Med*. 2020 Jul;180(7):934–43.
- [29] Li X, Xu S, Yu M, Wang K, Tao Y, Zhou Y, et al. Risk factors for severity and mortality in adult COVID-19 inpatients in Wuhan. *J Allergy Clin Immunol*. 2020 Jul;146(1):110–8.
- [30] Furlow B. COVACTA trial raises questions about tocilizumab’s benefit in COVID-19. *Lancet Rheumatol* [Internet]. 2020 Oct;2(10):e592. Available from: <https://www.ncbi.nlm.nih.gov/pmc/articles/PMC7480990/pdf/main.pdf>
- [31] Rouleau M, Patel A, Hendzel MJ, Kaufmann SH, Poirier GG. PARP inhibition: PARP1 and beyond. *Nat Rev Cancer*. 2010 Apr;10(4):293–301.
- [32] Henning RJ, Bourgeois M, Harbison RD. Poly(ADP-ribose) Polymerase (PARP) and PARP Inhibitors: Mechanisms of Action and Role in Cardiovascular Disorders. *Cardiovasc Toxicol*. 2018 Dec;18(6):493–506.
- [33] Kulkarni S, Fisk M, Kostapanos M, Banham-Hall E, Bond S, Hernan-Sancho E, et al. Repurposed immunomodulatory drugs for Covid-19 in pre-ICu patients - mulTi-Arm Therapeutic study in pre-ICu patients admitted with Covid-19 – Repurposed Drugs (TACTIC-R): A structured summary of a study protocol for a randomised controlled trial. *Trials* [Internet]. 2020;21(1):626. Available from: <https://doi.org/10.1186/s13063-020-04535-4>
- [34] Foell D, Ichida F, Vogl T, Yu X, Chen R, Miyawaki T, et al. S100A12 (EN-RAGE) in monitoring Kawasaki disease. *Lancet (London, England)*. 2003 Apr;361(9365):1270–2.
- [35] Whittaker E, Bamford A, Kenny J, Kaforou M, Jones CE, Shah P, et al. Clinical Characteristics of 58 Children With a Pediatric Inflammatory Multisystem Syndrome Temporally Associated With SARS-CoV-2. *JAMA*. 2020 Jul;324(3):259–69.
- [36] Armaroli G, Verweyen E, Pretzer C, Kessel K, Hirono K, Ichida F, et al. Monocyte-Derived Interleukin-1 $\beta$  As the Driver of S100A12-Induced Sterile Inflammatory Activation of Human Coronary Artery Endothelial Cells: Implications for the Pathogenesis of Kawasaki Disease. *Arthritis Rheumatol* [Internet]. 2019 May 25;71(5):792–804. Available from: <https://onlinelibrary.wiley.com/doi/abs/10.1002/art.40784>
- [37] Ucciferri C, Auricchio A, Di Nicola M, Potere N, Abbate A, Cipollone F, et al. Canakinumab in a subgroup of patients with COVID-19. *Lancet Rheumatol* [Internet]. 2020 Aug;2(8):e457–ee458. Available from: <http://www.ncbi.nlm.nih.gov/pubmed/32835251>
- [38] Predecki M, Clarke C, Medjeral-Thomas N, McAdoo SP, Sandhu E, Peters JE, et al. Temporal changes in complement activation in haemodialysis patients with COVID-19 as a predictor of disease progression. *Clin Kidney J* [Internet]. 2020 Oct 1;13(5):889–96. Available from: <https://doi.org/10.1093/ckj/sfaa192>
- [39] Goicoechea de Jorge E, Caesar JJE, Malik TH, Patel M, Colledge M, Johnson S, et al. Dimerization of complement factor H-related proteins modulates complement activation in vivo. *Proc Natl Acad Sci U S A*. 2013 Mar;110(12):4685–90.

- [40] Smith K, Pace A, Ortiz S, Kazani S, Rottinghaus S. A Phase 3 Open-label, Randomized, Controlled Study to Evaluate the Efficacy and Safety of Intravenously Administered Ravulizumab Compared with Best Supportive Care in Patients with COVID-19 Severe Pneumonia, Acute Lung Injury, or Acute Respiratory Distre. Vol. 21, *Trials*. 2020. p. 639.
- [41] Saha SK, Choi HY, Kim BW, Dayem AA, Yang G-M, Kim KS, et al. KRT19 directly interacts with  $\beta$ -catenin/RAC1 complex to regulate NUMB-dependent NOTCH signaling pathway and breast cancer properties. *Oncogene*. 2017 Jan;36(3):332–49.
- [42] Gandolfo LC, Speed TP. RLE plots: Visualizing unwanted variation in high dimensional data. *PLoS One*. 2018;13(2):1–9.
- [43] Kuhn M. Building predictive models in R using the caret package. *J Stat Softw*. 2008;28(5):1–26.
- [44] Bates D, Mächler M, Bolker BM, Walker SC. Fitting linear mixed-effects models using lme4. *J Stat Softw*. 2015;67(1).
- [45] Kuznetsova A, Brockhoff PB, Christensen RHB. lmerTest Package: Tests in Linear Mixed Effects Models . *J Stat Softw*. 2017;82(13).
- [46] Leo B. Random forests. *Mach Learn*. 2001;45:5–32.
- [47] Paluzynska A, Biecek P, Jiang Y. randomForestExplainer: Explaining and Visualizing Random Forests in Terms of Variable Importance [Internet]. R Foundation for Statistical Computing; 2020. Available from: <https://cran.r-project.org/package=randomForestExplainer>
- [48] Perperoglou A, Sauerbrei W, Abrahamowicz M, Schmid M. A review of spline function procedures in R. *BMC Med Res Methodol*. 2019;19(1):1–16.

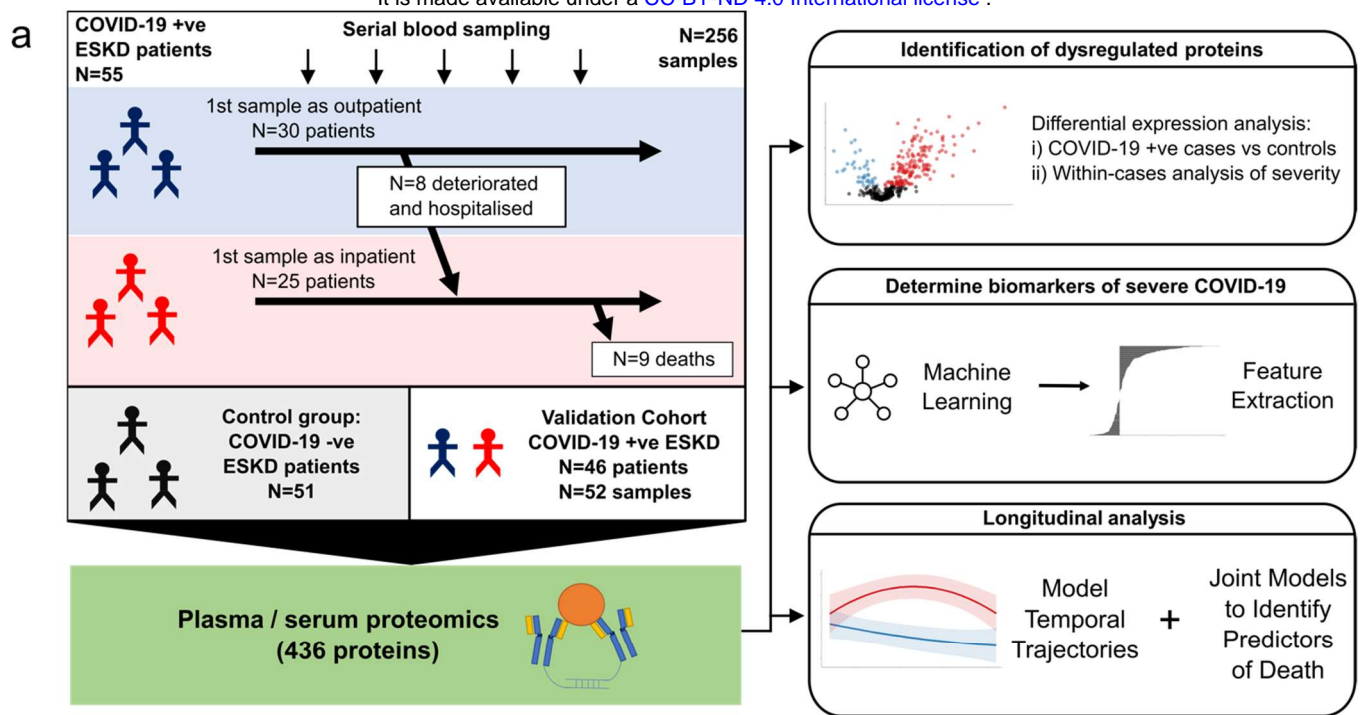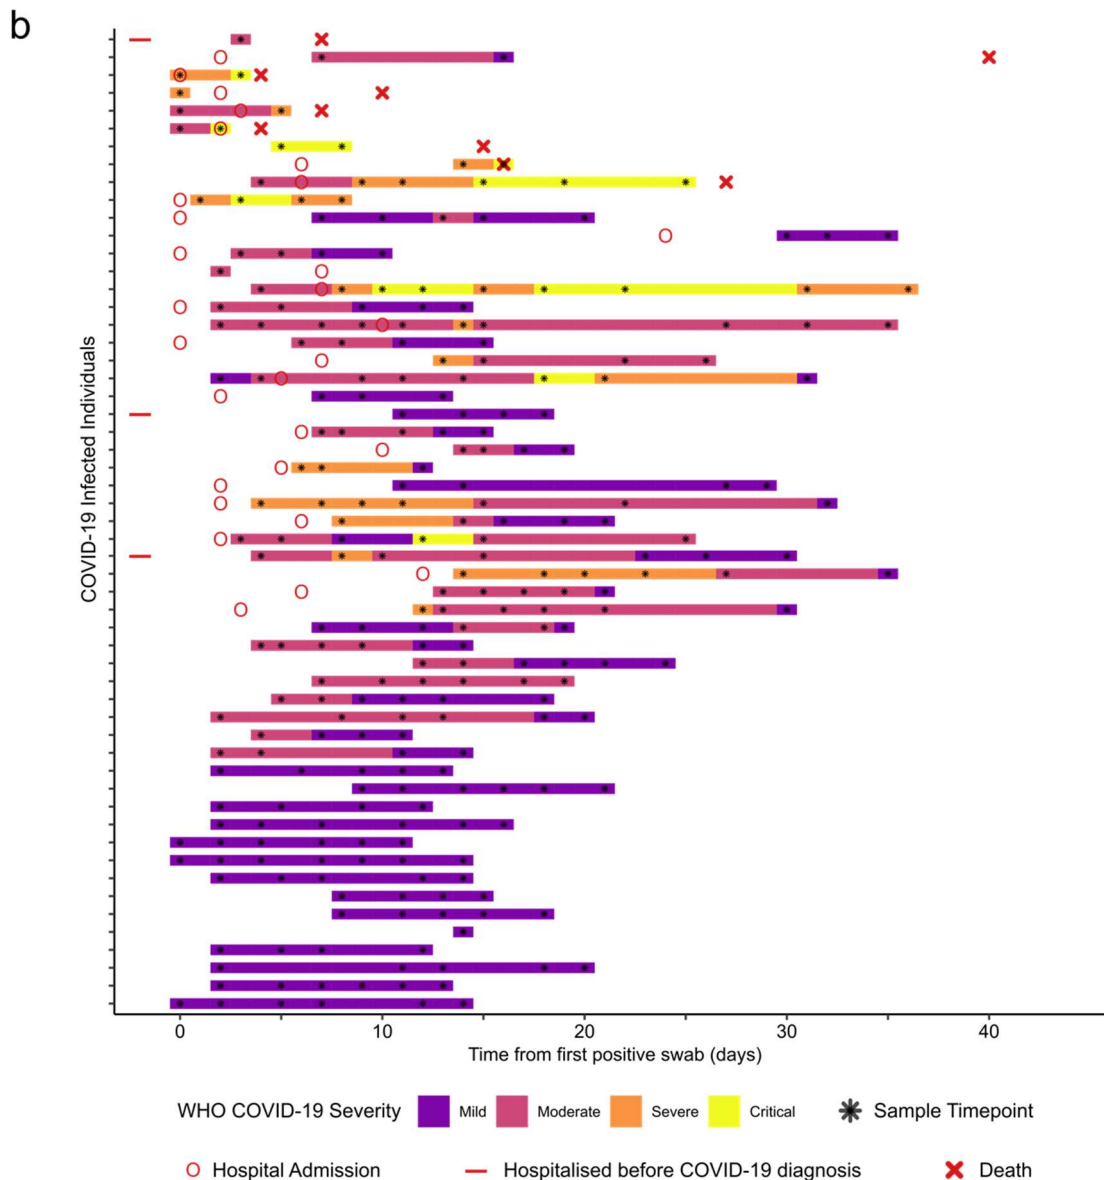

**Figure 1 – Study design.** **a)** Schematic representing a summary of the patient cohorts, sampling and the major analyses. Blue and red stick figures represent outpatients and hospitalised patients, respectively. **b)** Timing of serial blood sampling in relation to clinical course of COVID-19 (primary cohort). Black asterixes indicate when plasma samples were obtained. Three patients were already in hospital prior to COVID-19 diagnosis (indicated by red bars).

It is made available under a [CC-BY-ND 4.0 International license](https://creativecommons.org/licenses/by-nd/4.0/).

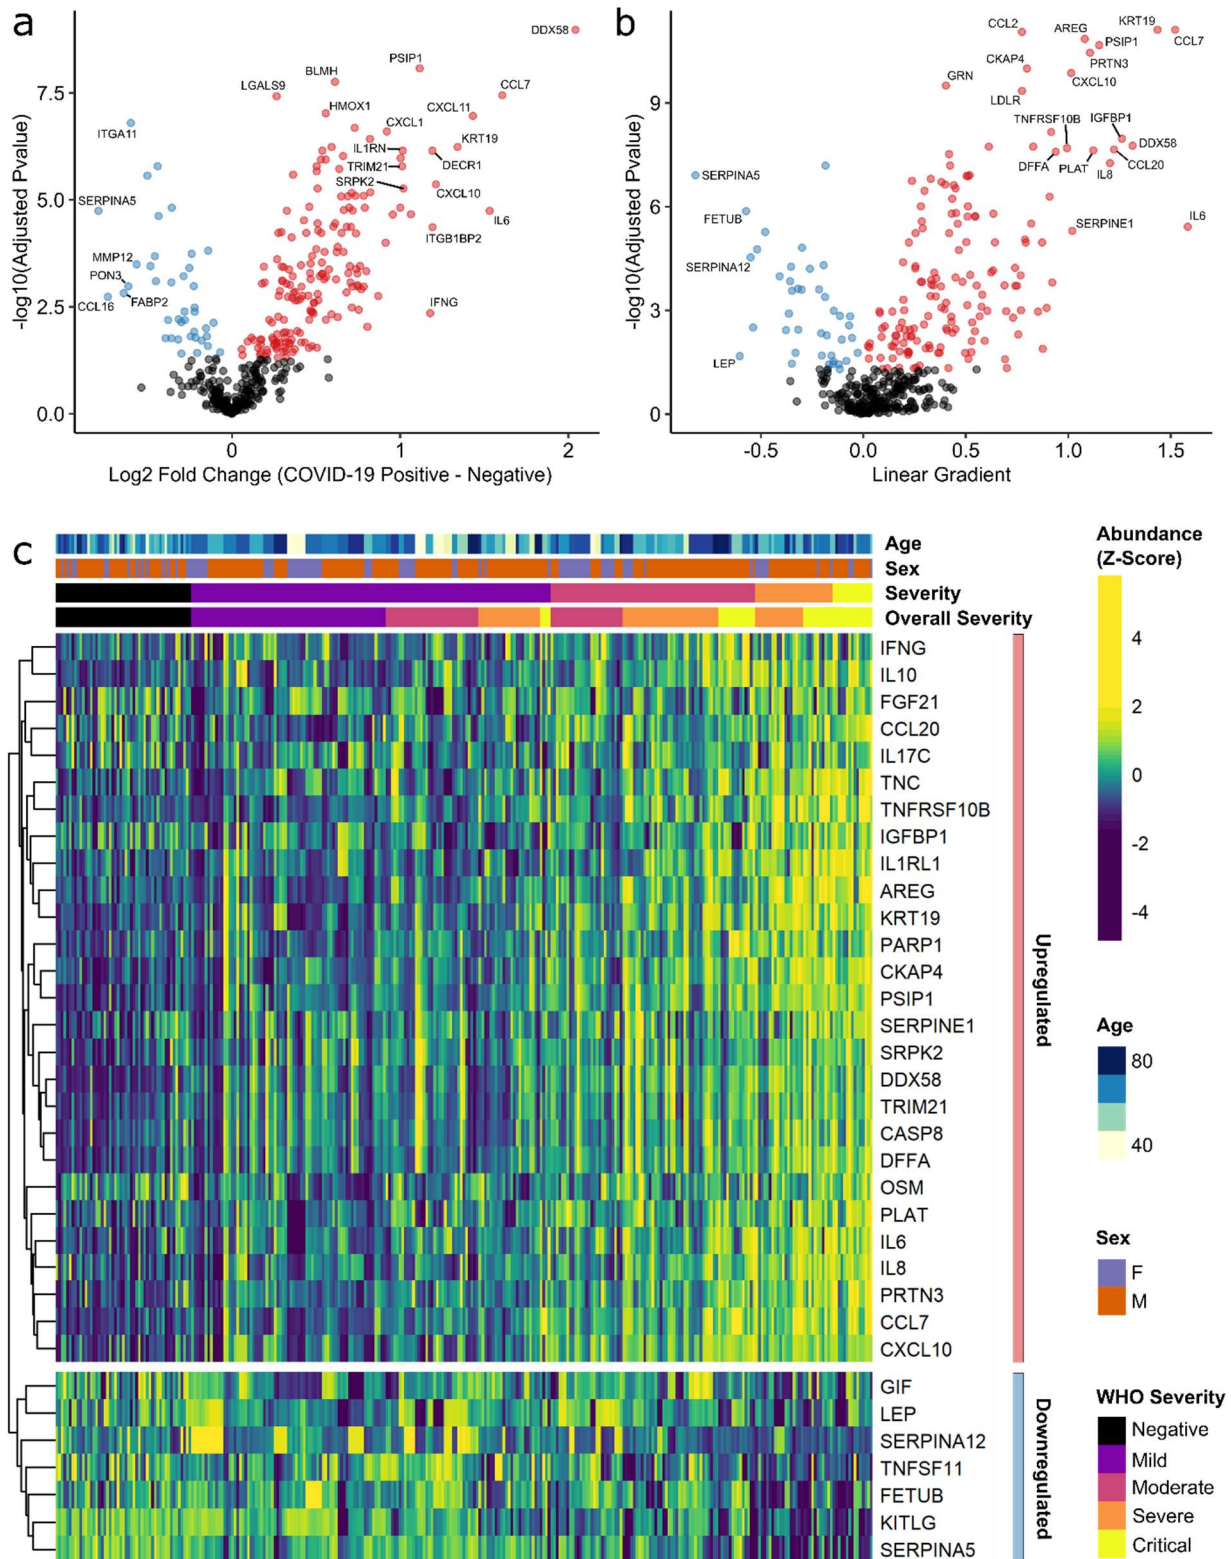

**Figure 2 – Identification of dysregulated proteins.**

**a) Proteins up-regulated (red) or down-regulated (blue) in COVID-19 positive patients versus negative ESKD patients.** n= 256 plasma samples from 55 COVID-19 positive patients, versus n= 51 ESKD controls (1 sample per control patient).

**b) Proteins associated with disease severity.** Associations of protein levels against WHO severity score at the time of sampling. Linear gradient indicates the effect size. A positive linear gradient (red) indicates that an increase in protein level is associated with increasing disease severity and a negative gradient (blue) the opposite. n= 256 plasma samples from 55 COVID-19 positive patients. For **a)** and **b)**: P-values from linear mixed models after Benjamini-Hochberg adjustment; significance threshold= 5% FDR; dark-grey = non-significant.

**c) Heatmap showing protein levels for selected proteins with strong associations with severity.** Each column represents a sample (n=256 COVID-19 samples and 51 non-infected samples). Each row represents a protein. Proteins are annotated using the symbol of their encoding gene. For the purposes of legibility, not all significantly associated proteins are shown; the heatmap is limited to the 17% most up- or down-regulated proteins (by effect size) of those with a significant association. Proteins are ordered by hierarchical clustering. Samples are ordered by WHO severity at the time of blood sample ('Severity'). 'Overall clinical course' indicates the peak WHO severity over the course of the illness.

It is made available under a [CC-BY-ND 4.0 International license](https://creativecommons.org/licenses/by-nd/4.0/).

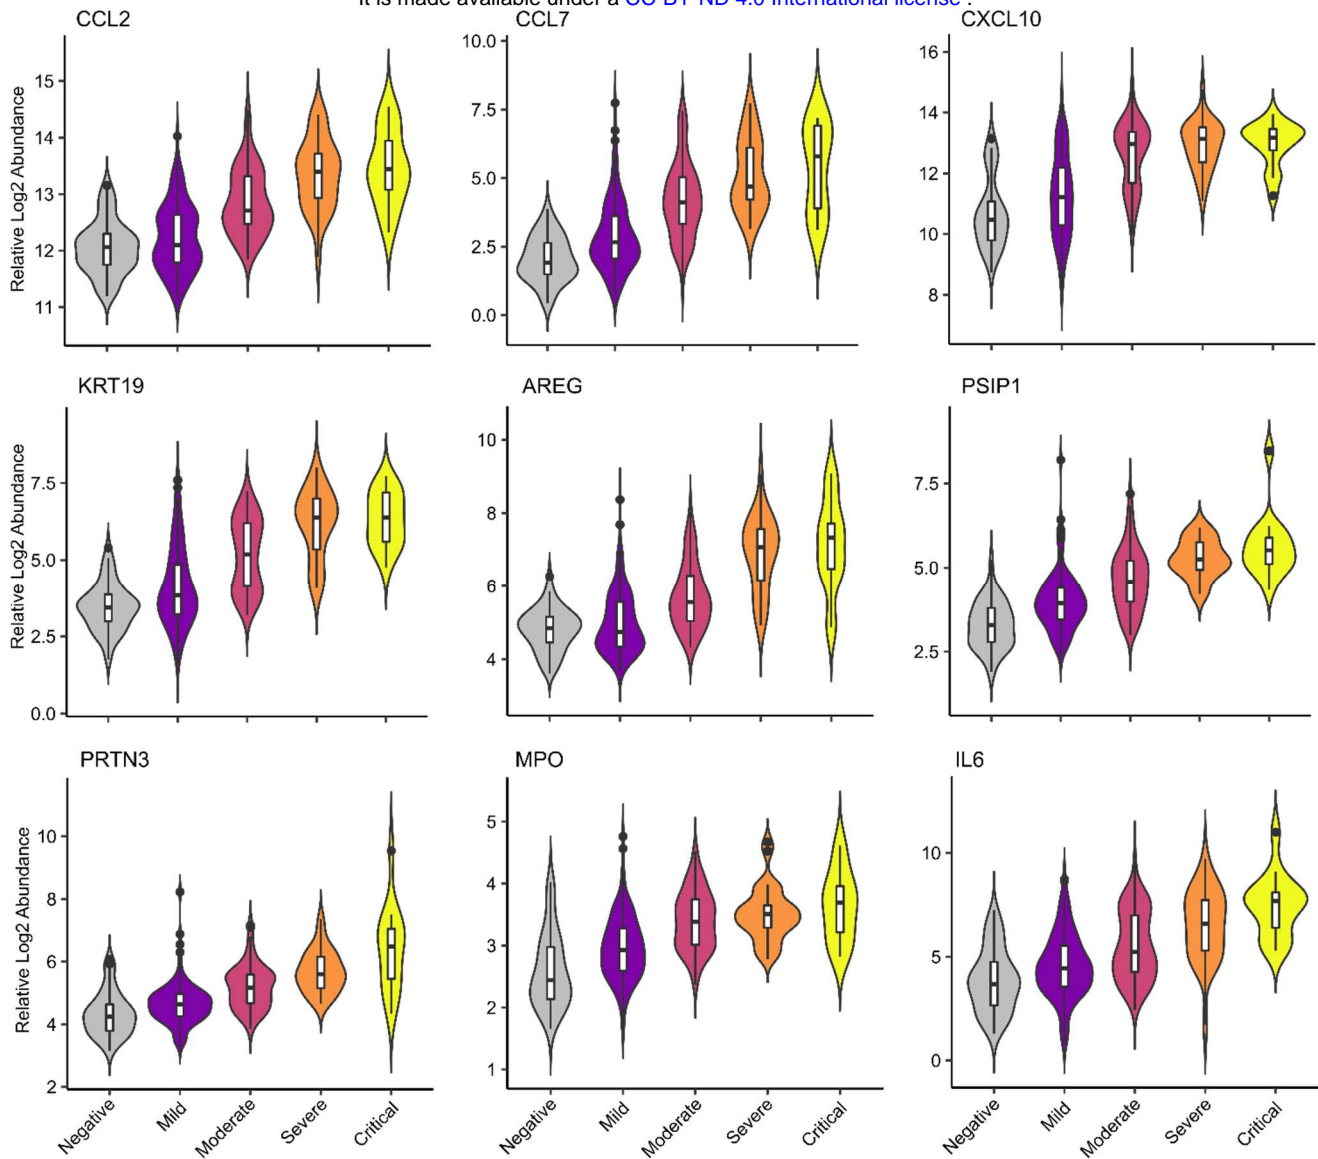

**Figure 3 – Selected proteins strongly associated with COVID-19 severity.**

Violin plots showing distribution of plasma protein levels according to COVID-19 status at the time of blood draw. Boxplots indicate median and interquartile range. n=256 samples from 55 COVID-19 patients and 51 samples from non-infected patients. WHO severity indicates the clinical severity score of the patient at the time the sample was taken. Mild n=135 samples; moderate n=77 samples; severe n=29 samples; critical n= 15 samples. Upper panel: monocyte chemokines. Middle panel: markers of epithelial injury. Lower panel: 2 neutrophil proteases, and IL6.

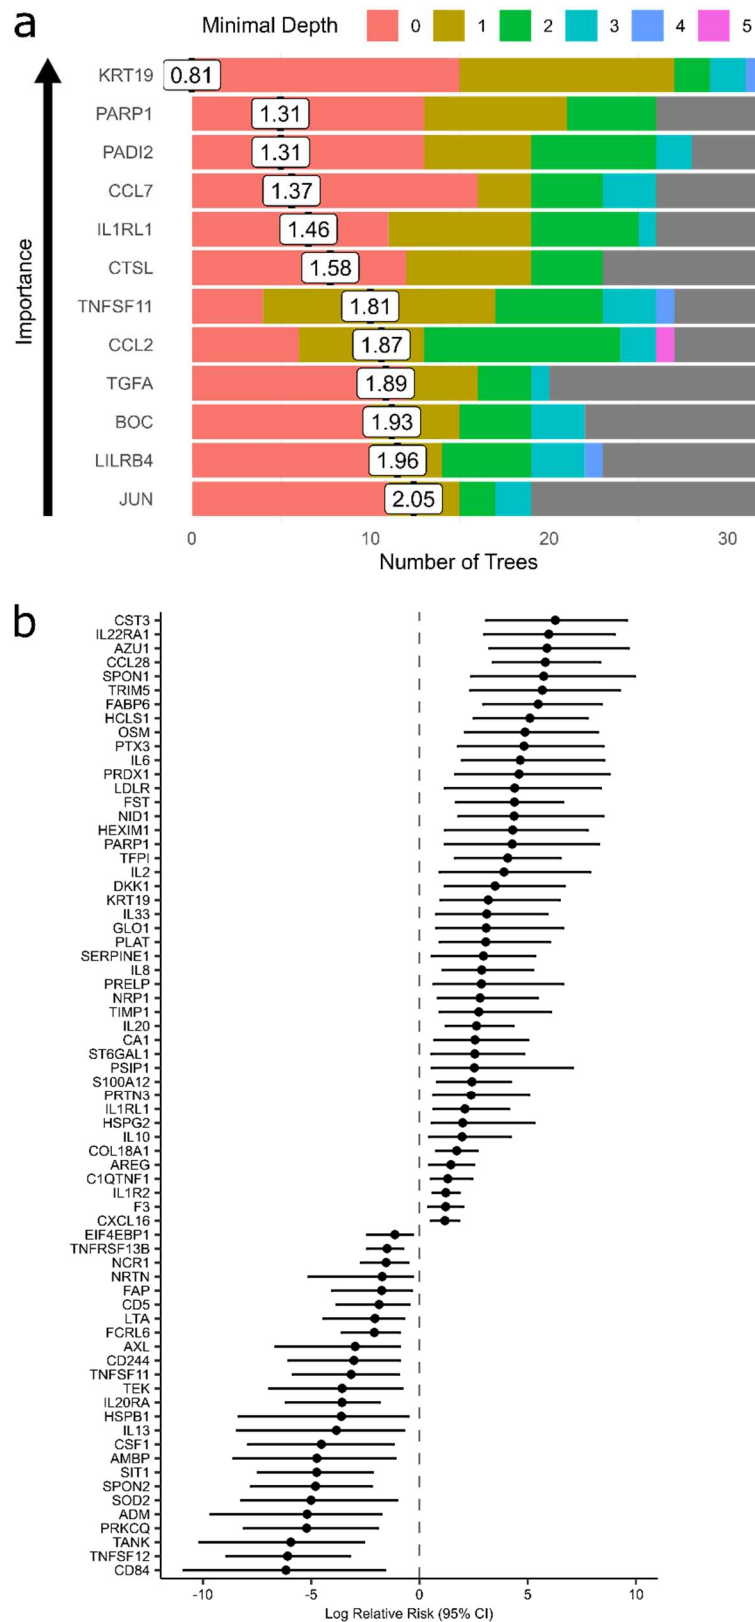

**Figure 4 – Prediction of severe COVID-19 and death.**

**a)** The 12 most important proteins for predicting overall clinical course (defined by peak COVID-19 WHO severity) using Random Forests supervised learning. If a variable is important for prediction, it is likely to appear in many decision trees (number of trees) and be close to the root node (i.e. have a low minimal depth). The mean minimal depth across all trees (white box) was used as the primary feature selection metric.

**b)** Proteins that are significant predictors of death (Benjamini-Hochberg adjusted  $p < 0.05$ ).  $n=256$  samples from 55 COVID-19 positive patients, of whom 9 died. Effect size estimates are from a joint model. Bars indicate 95% confidence intervals. For proteins with a positive log relative risk, a higher concentration corresponds to a high risk of death, and vice versa for proteins with negative values.

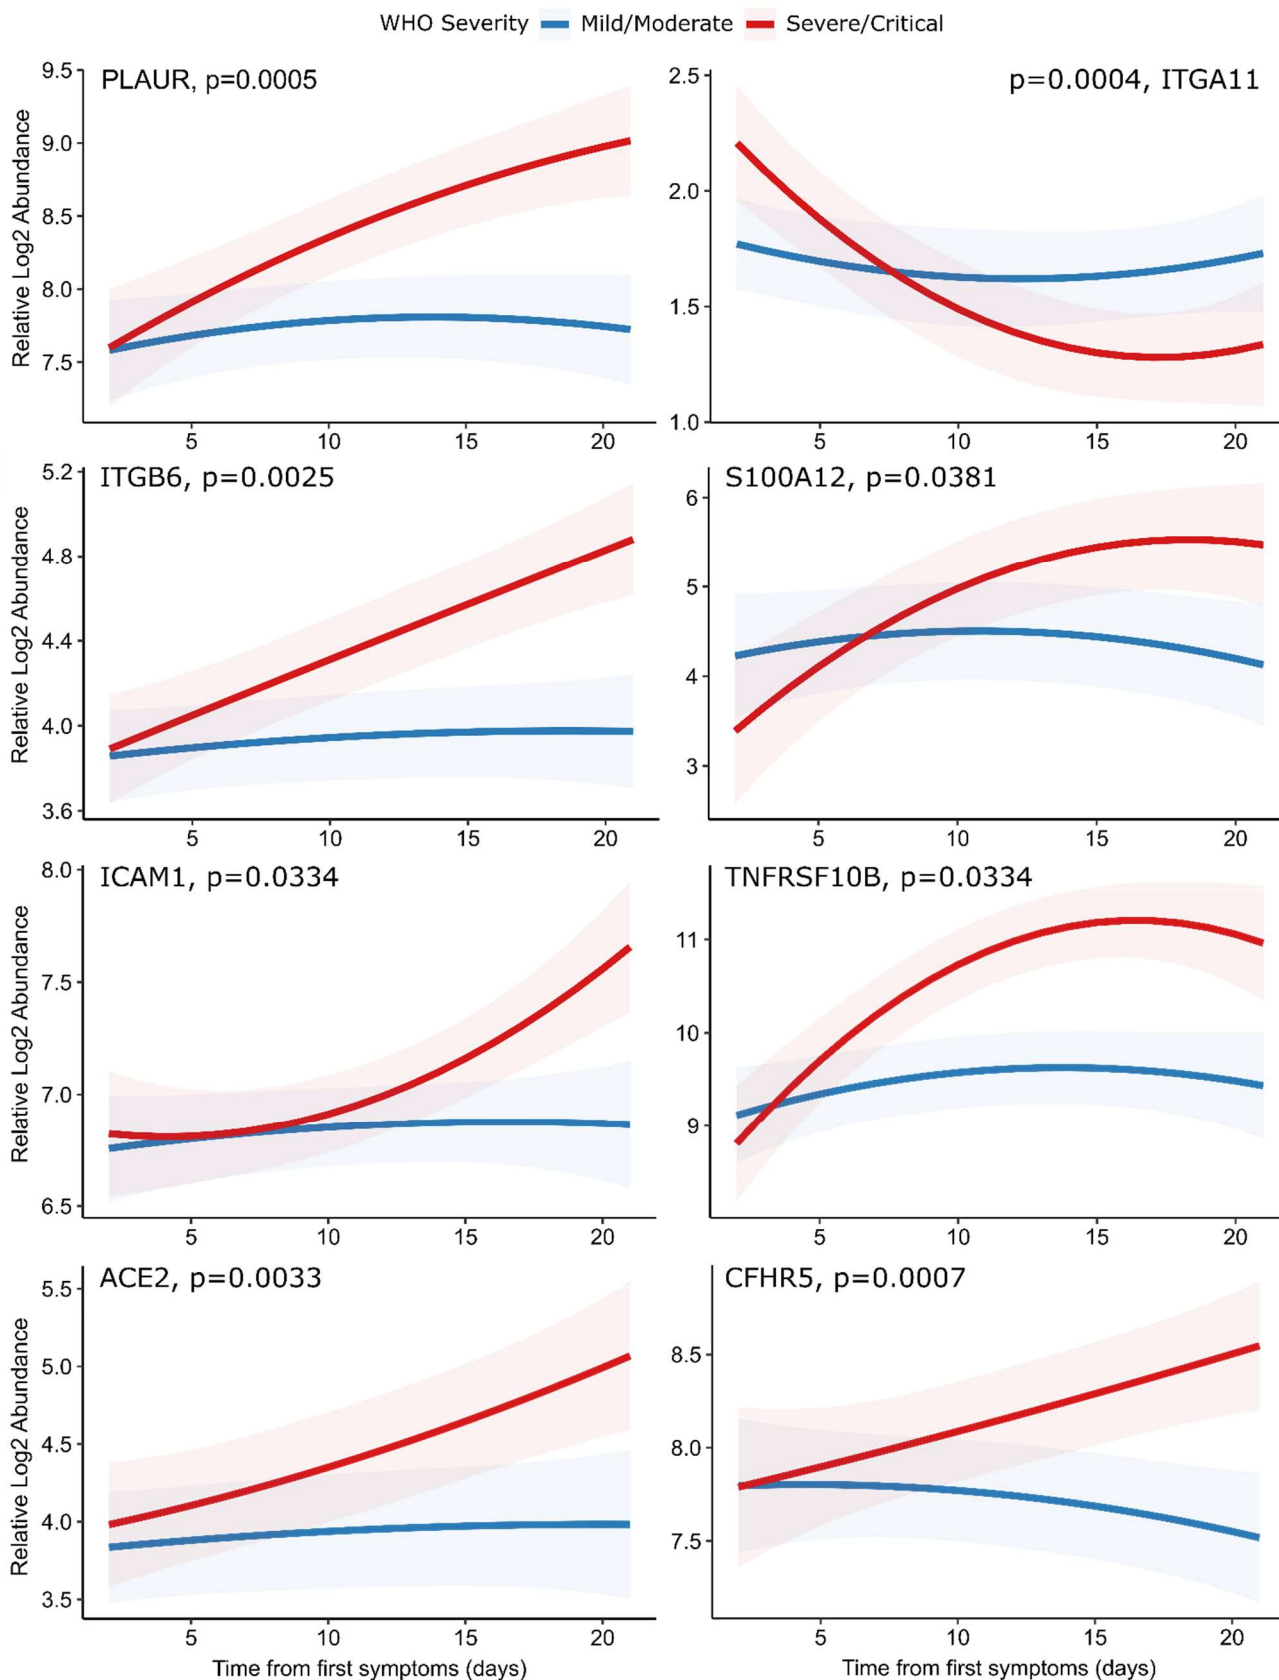

### Figure 5 – Modelling of temporal protein trajectories.

Examples of proteins displaying altered longitudinal trajectories between patients with a mild or moderate ( $n=28$ ) versus severe or critical ( $n=27$ ) overall clinical course (defined by peak WHO severity). Means and 95% confidence intervals for each group, predicted using linear mixed models (**Methods**), are plotted. P values are shown for the severity x time interaction term, after Benjamini-Hochberg correction for the 436 proteins tested.



## Supplementary Material: Table of Contents

**Extended Figure 1**

**Extended Figure 2**

**Extended Figure 3**

**Extended Figure 4**

**Extended Figure 5**

**Extended Figure 6**

**Supplementary Table 1.** Baseline characteristics of the primary cohort.

**Legends for Supplementary Tables 2-10**

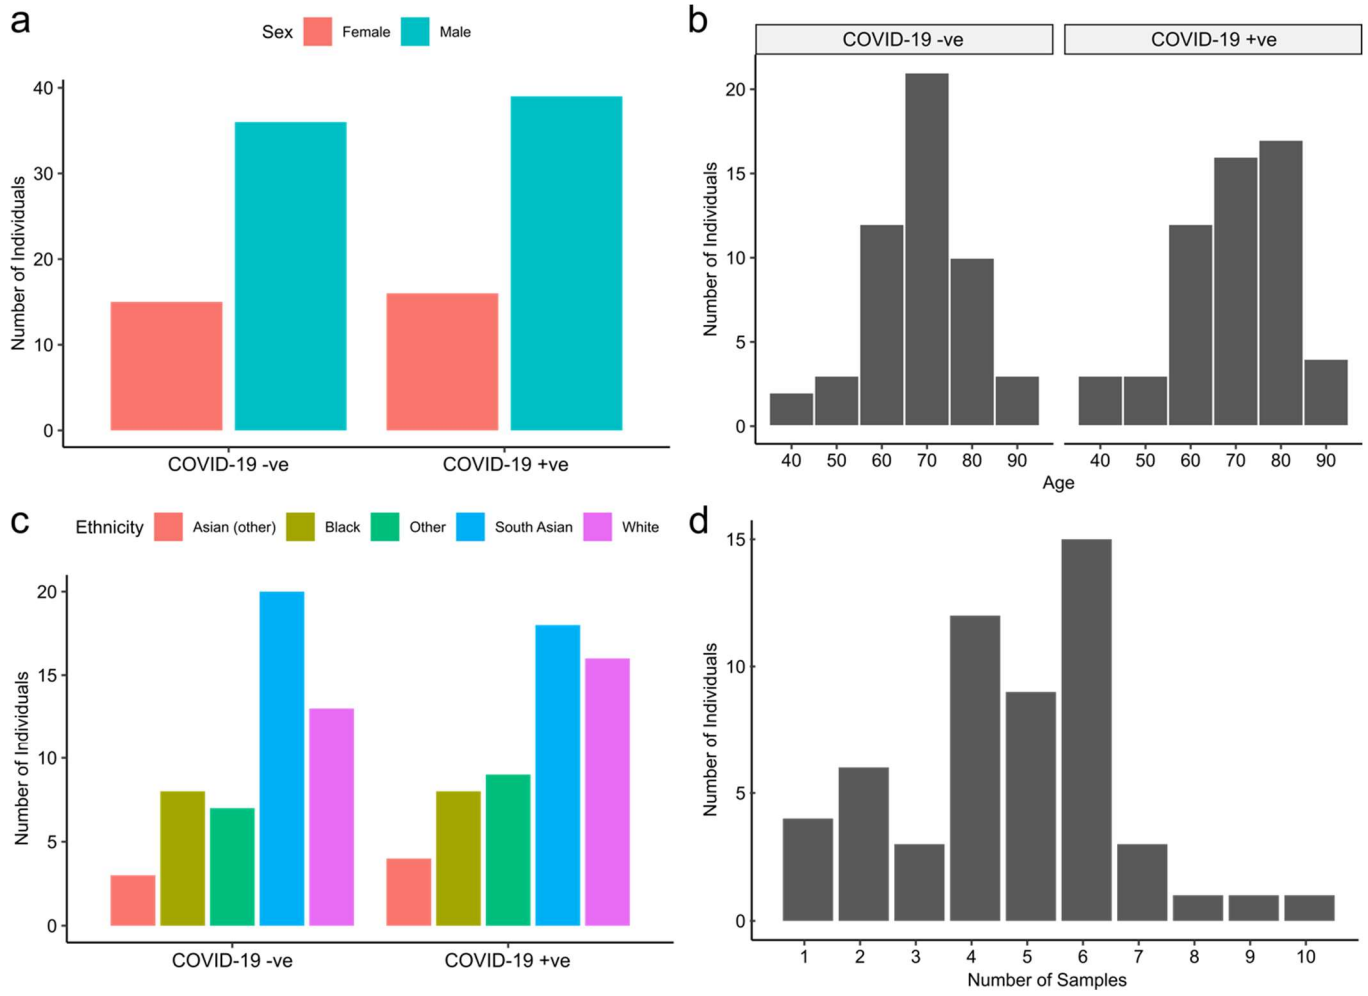

**Extended Figure 1 – Baseline characteristics of the primary cohort.**

The number of COVID-19 positive and negative patients in the study, stratified by: **a)** sex, **b)** age, and **c)** ethnicity. **d)** Serial samples obtained for COVID-19 patients.

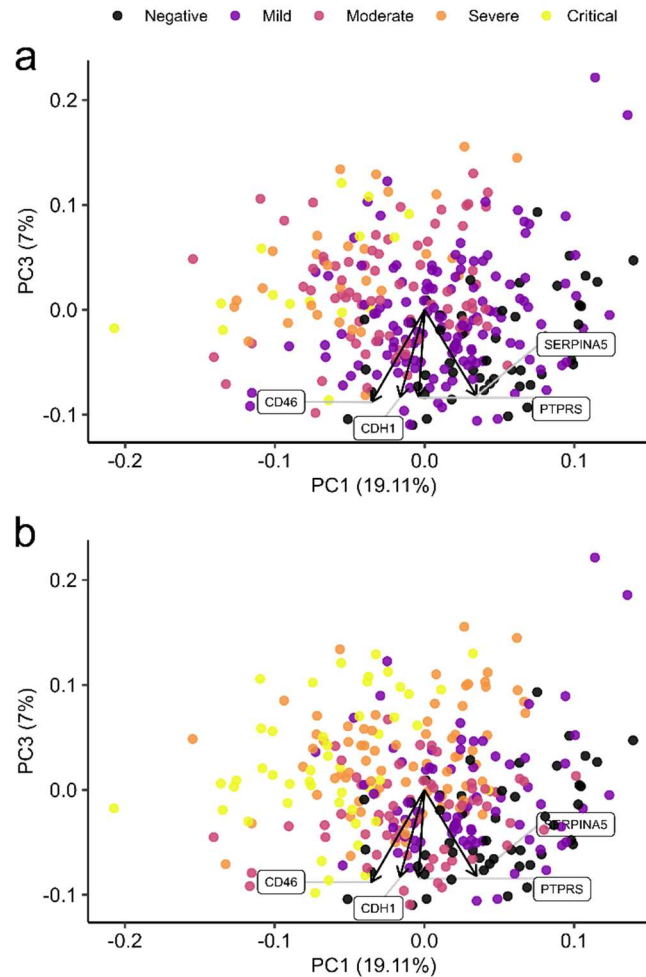

**Extended Figure 2 – Principal components analysis (primary cohort).**

PCs = principal components. Each point represents a sample. Due to serial sampling, there are multiple samples for most patients. The top PC loadings are plotted as arrows. The proportion of variance explained by each PC is shown in parentheses on the axis labels.

**a)** Primary cohort (principal components 1 versus 3). Colouring indicates WHO severity at the time of sampling.

**b)** As a), except coloured by the peak WHO severity over the course of the illness for the patient from which that sample was taken.

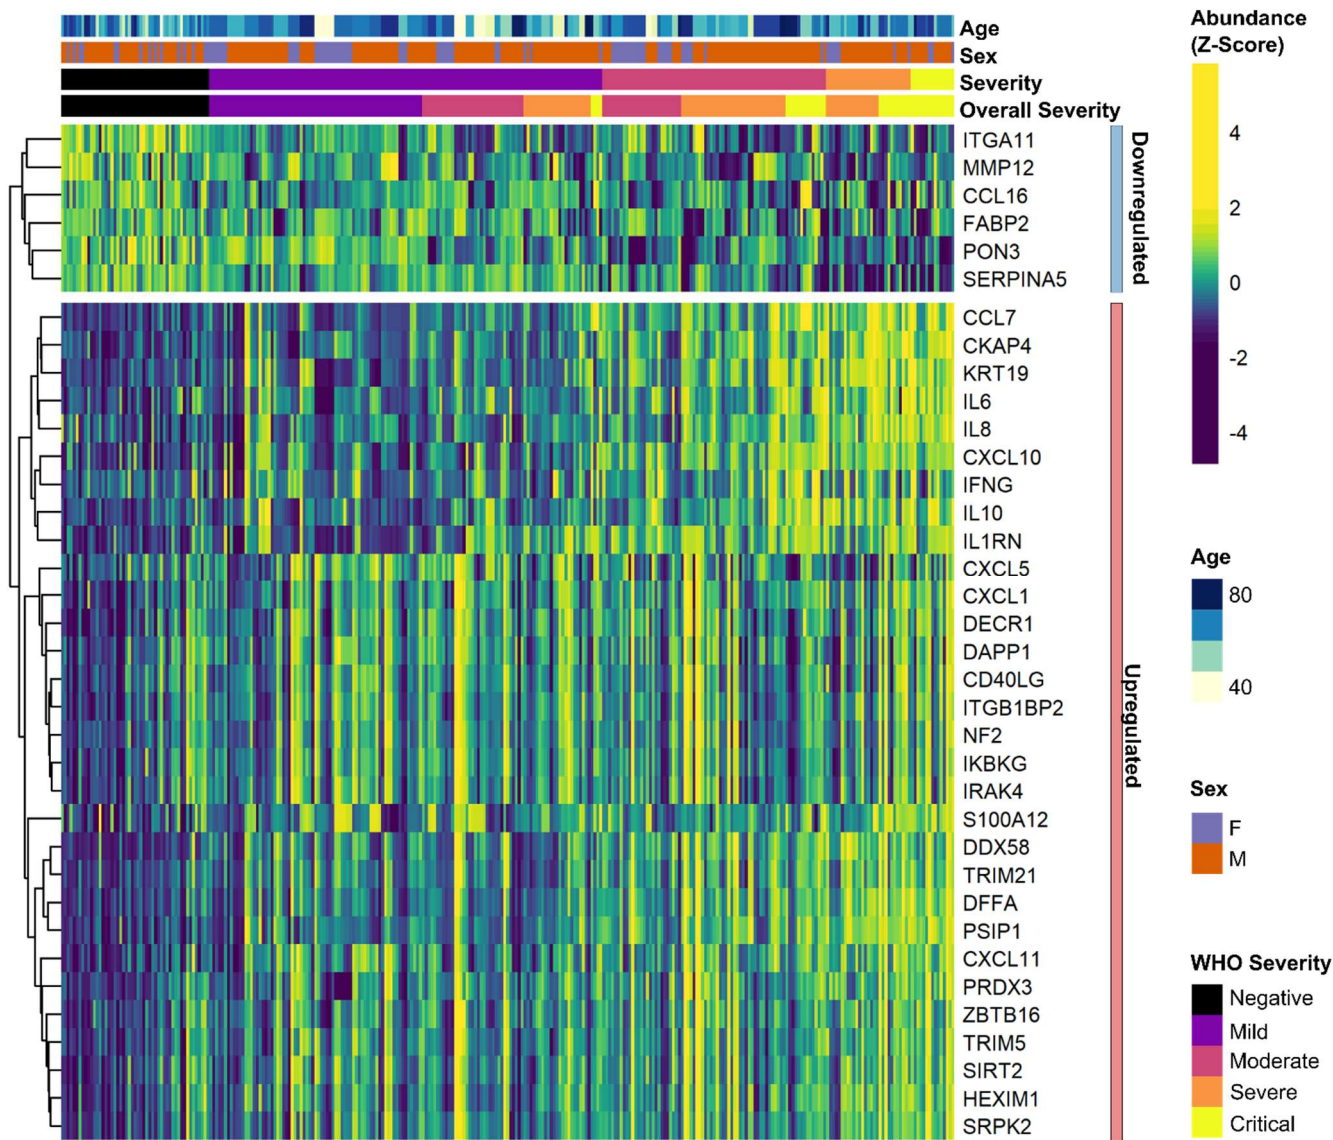

**Extended Figure 3- differential abundance analysis between ESKD patients with and without COVID-19.**

Heatmap showing selected proteins with the largest fold changes in differential abundance analysis (primary cohort). Each column represents a sample and each row represents a protein. For the purposes of legibility, not all significantly differentially abundant proteins are shown; the heatmap is limited to the 17% most up- or down-regulated proteins (by fold change) of those with a significant association. Proteins are ordered by hierarchical clustering. Samples are ordered by WHO severity at the time of blood sample ('Severity'). 'Overall clinical course' indicates the peak WHO severity over the course of the illness. Proteins are annotated using the symbol of the gene that encodes them.

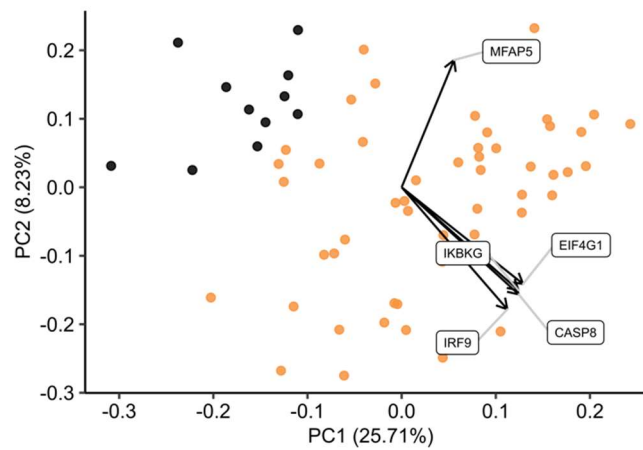

### Extended Figure 4 - PCA for validation cohort.

Principal components 1 versus 3. The leading loadings are plotted as arrows on each plot. The variation explained by each PC is shown in parentheses.

a

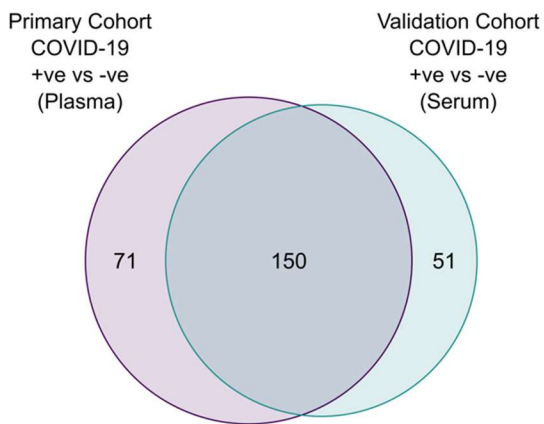

b

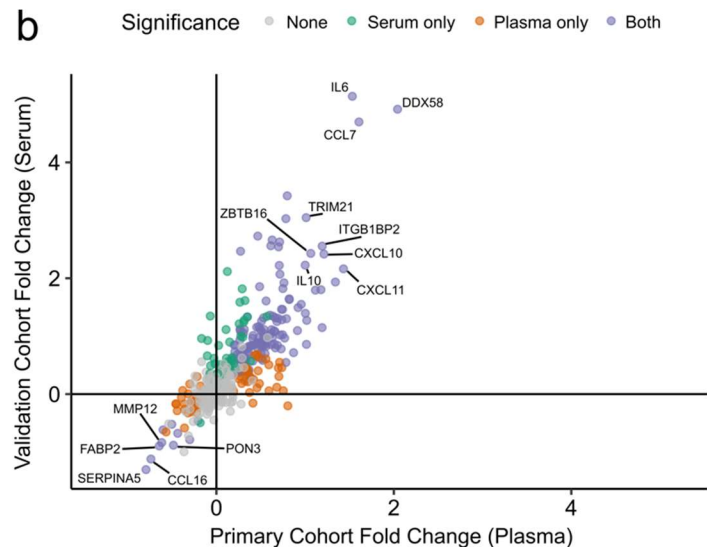

### Extended Figure 5 – Replication.

a) Overlap between the significant associations in the differential abundance analysis between ESKD patients with and without COVID-19 in the primary and validation cohorts. 5% FDR was used as the significance threshold in both analyses.

b) Comparison of estimated effect sizes for all 436 proteins in the differential abundance analyses (COVID-19 positive versus negative) in the primary and validation cohorts. Each point represents a protein. Pearson's  $r = 0.801$ .

Differential abundance analyses were performed using linear mixed models. Primary cohort analysis (plasma samples): 256 samples from 55 COVID-19 patients versus 51 non-infected patient samples (single time-point). Validation cohort (serum samples): 52 samples from 55 COVID-19 patients and 11 non-infected patient samples (single time-point).

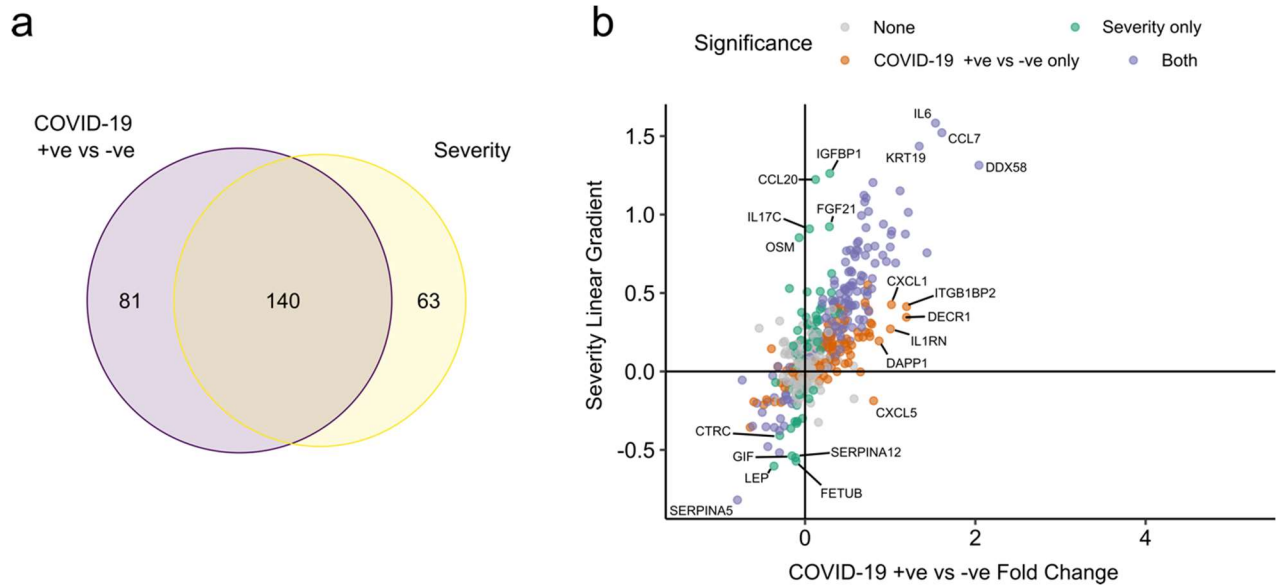

**Extended Figure 6 – comparison of proteins differentially expressed in COVID-19 with those associated with clinical severity.**

**a)** Overlap between the proteins significantly differentially expressed in COVID-19 (n=256 COVID-19 samples and 51 non-infected samples) versus those associated with severity (within cases analysis, n=256 samples) (primary cohort). 5% FDR was used as the significant cut-off in both analyses.

**b)** Comparison of effect sizes for each protein in the COVID-19 positive versus negative analysis (x-axis) and severity analysis (y-axis). Each point represents a protein.

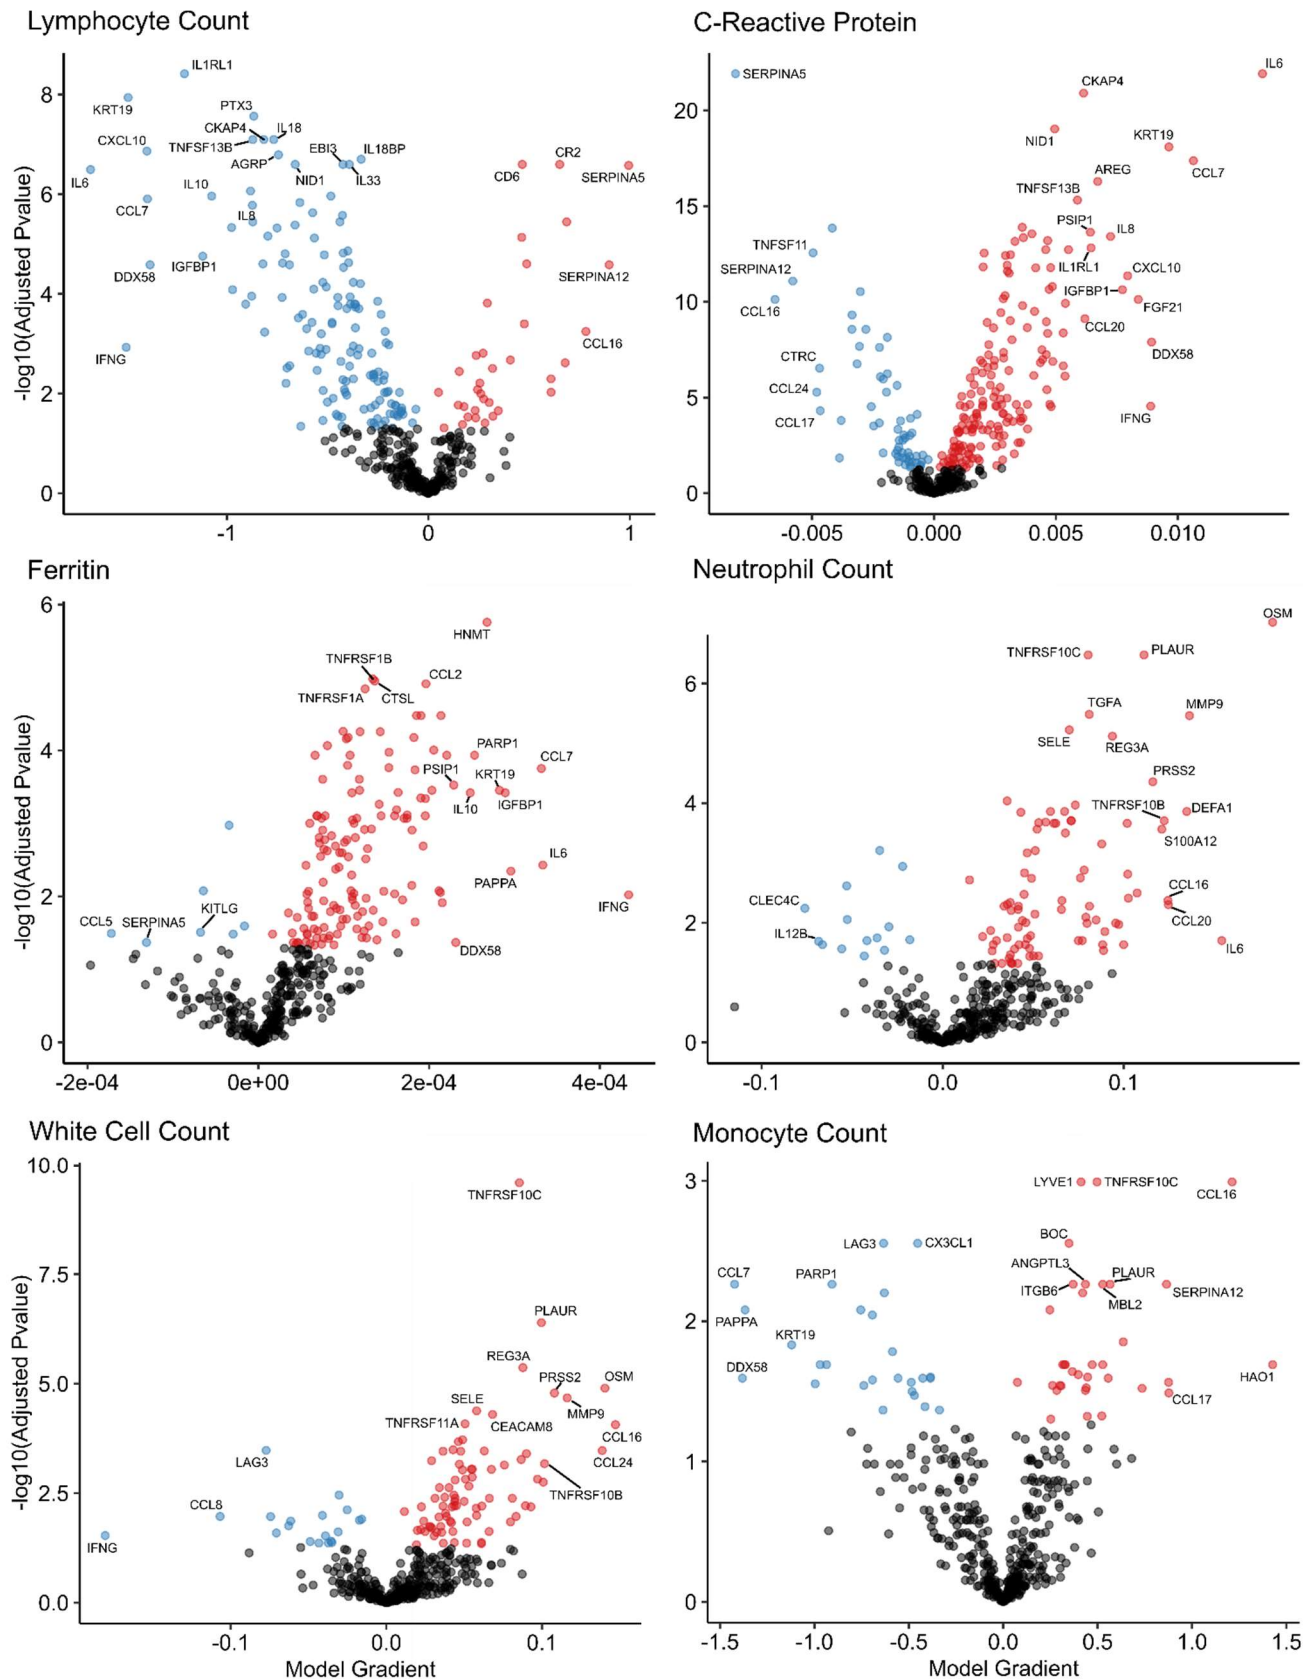

**Extended Figure 7 – Associations of clinical laboratory markers with plasma proteins.**

Proteins that are positively (red) or negatively (blue) associated with clinical laboratory parameters (5% FDR). P-values from differential abundance analysis using linear mixed models after Benjamini-Hochberg adjustment. Dark-grey = non-significant. Two associations were found for d-dimer (not shown- see **Supplementary Table 9**).

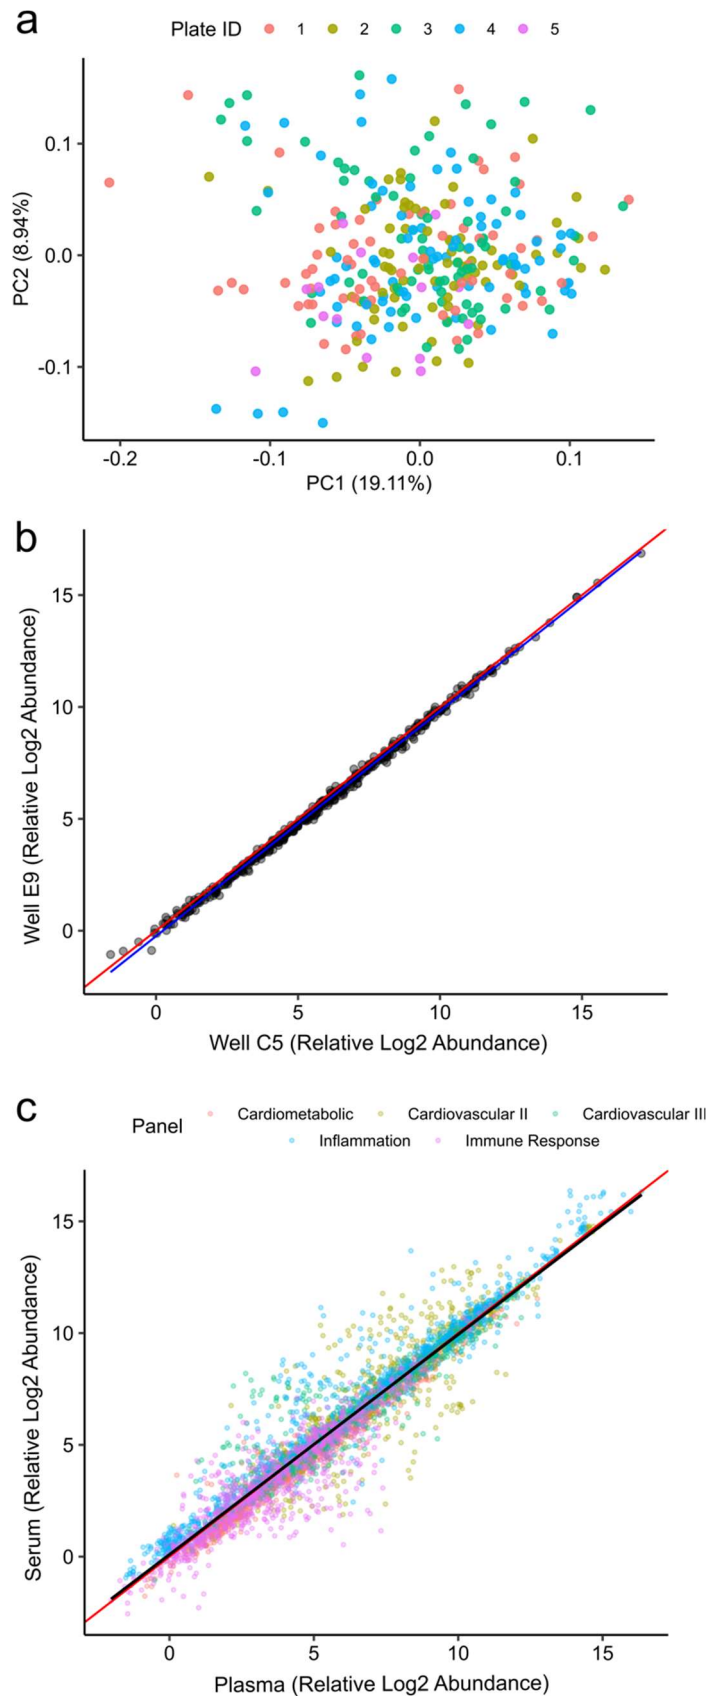

**Extended Figure 8 – Assay assessment.**

**a)** No evidence of plate effects. Principle components analysis of the primary cohort coloured by plate.

**b)** Consistency of the Olink assay platform in a technical replicate (Pearson's  $r = 0.999$ ).

**c)** Correlation of protein measurements between plasma and serum in the same individuals. For 11 non-infected ESKD patients, both plasma and serum samples were obtained from the same blood draw. Paired protein measurements are plotted (Pearson's  $r = 0.957$ ).



|                       | Non-infected ESKD patients (n=51) | Primary Cohort                 |                                |                                  |                       | Validation Cohort COVID-19+ ESKD patients (n=46) |
|-----------------------|-----------------------------------|--------------------------------|--------------------------------|----------------------------------|-----------------------|--------------------------------------------------|
|                       |                                   | COVID-19+ ESKD patients (n=55) | Mild or moderate subset (n=28) | Severe or critical subset (n=27) | Fatal COVID-19+ (n=9) |                                                  |
| <b>Age</b>            |                                   |                                |                                |                                  |                       |                                                  |
| Median (IQR)          | 70.1<br>62.2-75.1                 | 72.2<br>62.5-77.3              | 73.4<br>65.5-76.4              | 68.5<br>61.8-78.8                | 73.9<br>71.0-77.0     | 64.3<br>60.3-73.0                                |
| <b>Sex</b>            |                                   |                                |                                |                                  |                       |                                                  |
| M                     | 36 (70.6%)                        | 39 (70.9%)                     | 18 (64.3%)                     | 21 (77.8%)                       | 5 (55.6%)             | 32 (69.6%)                                       |
| F                     | 15 (29.4%)                        | 16 (29.1%)                     | 10 (35.7%)                     | 6 (22.2%)                        | 4 (44.4%)             | 14 (30.4%)                                       |
| <b>Ethnicity</b>      |                                   |                                |                                |                                  |                       |                                                  |
| White                 | 13 (25.5%)                        | 16 (29.1%)                     | 5 (17.9%)                      | 11 (40.7%)                       | 4 (44.4%)             | 11 (23.9%)                                       |
| Black                 | 8 (15.7%)                         | 8 (14.5%)                      | 5 (17.9%)                      | 3 (11.1%)                        | 1 (11.1%)             | 8 (17.4%)                                        |
| South Asian           | 20 (39.2%)                        | 18 (32.7%)                     | 10 (35.7%)                     | 8 (29.6%)                        | 2 (22.2%)             | 12 (26.1%)                                       |
| Asian (other)         | 3 (5.9%)                          | 4 (7.3%)                       | 1 (3.6%)                       | 3 (11.1%)                        | 1 (11.1%)             | 7 (15.2%)                                        |
| Other                 | 7 (13.7%)                         | 9 (16.4%)                      | 7 (25.0%)                      | 2 (7.4%)                         | 1 (11.1%)             | 8 (17.4%)                                        |
| <b>Diabetes</b>       | 24 (47.1%)*                       | 34 (61.8%)*                    | 16 (57.1%)                     | 18 (66.7%)                       | 4 (44.4%)             | 29 (63.0%)                                       |
| <b>Current smoker</b> | 0                                 | 1 (1.8%)                       | 1 (3.6%)                       | 0                                | 0                     | 2 (4.3%)                                         |
| <b>ESKD Cause</b>     |                                   |                                |                                |                                  |                       |                                                  |
| DN                    | 20 (39.2%)                        | 29 (52.7%)                     | 14 (50.0%)                     | 15 (55.6%)                       | 3 (33.3%)             | 19 (41.3%)                                       |
| Genetic               | 1 (2.0%)                          | 1 (1.8%)                       | 1 (3.6%)                       | 0                                | 0                     | 1 (2.2%)                                         |
| GN                    | 9 (17.6%)                         | 3 (5.5%)                       | 1 (3.6%)                       | 2 (7.4%)                         | 0                     | 7 (15.2%)                                        |
| HTN/Vascular          | 7 (13.7%)                         | 5 (9.1%)                       | 3 (5.5%)                       | 2 (7.4%)                         | 0                     | 3 (6.5%)                                         |
| Other                 | 4 (7.8%)                          | 8 (14.5%)                      | 5 (17.9%)                      | 3 (11.1%)                        | 2 (22.2%)             | 3 (6.5%)                                         |
| Unknown               | 10 (19.6%)                        | 9 (16.4%)                      | 4 (14.3%)                      | 5 (18.5%)                        | 4 (44.4%)             | 13 (28.3%)                                       |

**Supplementary Table 1 – Baseline characteristics of the primary cohort.**

GN = Glomerulonephritis. HTN = Hypertension. IQR = inter-quartile range. ‘South Asian’ represents individuals with Indian, Pakistani or Bangladeshi ancestry. Subsets defined according to peak WHO severity over the course of the illness.

\*One patient had type 1 diabetes, the remainder type 2.

## **Legends for Supplementary Tables 2-10**

### **Supplementary Table 2. Protein Annotation.**

List of the 436 proteins measured. GeneID = gene symbol of the gene encoding the protein (used as the main identifier in the manuscript); UniProt = UniProt ID; Olink Assay Name = protein id used by Olink; Protein Name = full protein name; Panel name = the name of the 92 protein multiplex Olink panel on which the protein was measured.

### **Supplementary Table 3. Differential abundance analysis for COVID-19 positive vs negative ESKD patients in the primary and validation cohorts.**

Summary statistics for all 436 proteins are shown. Pvalue = nominal p-value from linear mixed model. Adjusted Pvalue = p-values after Benjamini-Hochberg correction. Fold change = estimated fold change from regression coefficient. Proteins are ordered based on results in the primary cohort: first by whether they are significant or not (at 5% FDR), then by fold change (from positive to negative). Note the associations are not ordered by p-value so strong associations do not necessarily appear at the top of the table. Significant adjusted p-values in green and non-significant in red grey. Estimated fold changes are coloured in a gradient from red to blue for up or downregulated in COVID-19 +ve versus -ve, respectively.

Sample size for primary cohort: n= 256 plasma samples from 55 COVID-19 positive ESKD patients, versus n= 51 ESKD controls (1 sample per control patient).

Sample size for validation cohort: 52 samples from 55 COVID-19 patients and 11 non-infected patient samples (single time-point).

### **Supplementary Table 4. Comparison to other proteomic studies of COVID-19 positive vs negative patients.**

Proteins that were differentially abundant in COVID-19 +ve vs -ve patients in our data are listed (5% FDR). TRUE indicates that the protein was reported as differentially abundant in the relevant previous proteomic study. The final column summarises whether the association was previously reported in any 1 or more of the 4 studies. We have not harmonised significance thresholds between studies: we simply report whether the authors declared the protein significant by the threshold of their study.

### **Supplementary Table 5. Associations of proteins and COVID-19 severity (primary cohort).**

Summary statistics for all 436 proteins are shown. Pvalue = nominal p-value from linear mixed model. Adjusted Pvalue = p-values after Benjamini-Hochberg correction. Fold change = estimated fold change from regression coefficient. Proteins are ordered first by whether they are significant or not (at 5% FDR), then by linear gradient (effect size) from positive to negative. Note the associations are not ordered by p-value so strong associations do not necessarily appear at the top of the table.

### **Supplementary Table 6. Comparison to other proteomic studies of COVID-19 severity.**

Proteins that were associated with severity in our data are listed (5% FDR). TRUE indicates that the protein was reported as associated with severity in the relevant previous proteomic study. The final column summarises whether the association was previously reported in any 1 or more of the 4 studies. We have not harmonised significance thresholds between studies: we simply report whether the authors declared the protein significant by the threshold of their study.

### **Supplementary Table 7. Predictors of clinical course from Random Forests.**

Importance metrics for each protein for prediction according to a random forest model trained to predict current or future severe/critical disease using the first sample of each patient. Proteins are ordered by mean minimal depth across all trees – this was used as the primary importance metric.

### **Supplementary Table 8. Proteomic predictors of fatal COVID-19.**

Summary statistics from joint models for fatal disease. Results for all 436 proteins are shown. “Is significant” indicates significance (green) or not (grey) at 5% FDR. The association coefficient for each protein indicates the direction and magnitude of the estimated log relative risk for death (red: higher protein levels increases risk of death, blue the opposite). 95% confidence intervals are provided.

### **Supplementary Table 9. Associations of proteins and clinical laboratory measurements.**

Clinical variable = clinical lab tests: white cell count, lymphocyte count, neutrophil count, monocyte count, C-reactive protein, ferritin, d-dimer, troponin.

Results are shown for all 436 proteins against all 8 lab measurements.

Adjusted p-value = p-value from linear mixed model after Benjamini-Hochberg correction.

Gradient indicates effect size and direction. A positive gradient (red) indicates higher

“Is significant” indicates significance (green) or not (grey) at 5% FDR.

Contemporaneous clinical laboratory tests were not available for all plasma samples. The proportion of samples for which contemporaneous lab tests were available were: white cell count 66%, neutrophils 66%, monocytes 66%, lymphocytes 66%, CRP 64%, ferritin 36%, troponin 35%, d-dimer 30%.

### **Supplementary Table 10. Longitudinal proteomic profiling with linear mixed models.**

Summary statistics from the linear mixed models used to identify proteins with differential temporal trajectories between mild/moderate (n=28) and severe/critical COVID-19 patients (n=27).

Summary statistics for all 436 proteins are shown.

Pvalue = nominal p-value from linear mixed model for the interaction term between time from symptom onset (days) and severity (as a binary variable: mild-moderate or severe-critical). Adjusted Pvalue = p-values after Benjamini-Hochberg correction. “Is significant” indicates significance (green) or not (grey) at 5% FDR.
