1 **Longitudinal proteomic profiling of dialysis patients with COVID-19 reveals**  
2 **markers of severity and predictors of death**

3  
4 Jack Gisby<sup>\*1</sup>, Candice L. Clarke<sup>\*1,2</sup>, Nicholas Medjeral-Thomas<sup>\*1,2</sup>, Talat H. Malik<sup>1</sup>,  
5 Artemis Papadaki<sup>1</sup>, Paige M. Mortimer<sup>1</sup>, Norzawani B. Buang<sup>1</sup>, Shanice Lewis<sup>1</sup>,  
6 Marie Pereira<sup>1</sup>, Frederic Toulza<sup>1</sup>, Ester Fagnano<sup>1</sup>, Marie-Anne Mawhin<sup>1</sup>, Emma E.  
7 Dutton<sup>1</sup>, Lunnathaya Tapeng<sup>1</sup>, Arianne C. Richard<sup>3</sup>, Paul D. W. Kirk<sup>4,5</sup>, Jacques  
8 Behmoaras<sup>1</sup>, Eleanor Sandhu<sup>1,2</sup>, Stephen P. McAdoon<sup>1,2</sup>, Maria F. Prendecki<sup>1,2</sup>,  
9 Matthew C. Pickering<sup>1</sup>, Marina Botto<sup>1</sup>, Michelle Willicombe<sup>\*1,2</sup>, David C. Thomas<sup>\*1,2</sup>,  
10 James E. Peters<sup>\*1,6</sup>

11 \* equal contributions

12  
13 **Author Affiliations**

14 1) Centre for Inflammatory Disease, Dept of Immunology and Inflammation, Imperial College  
15 London.

16 2) Renal and Transplant Centre, Hammersmith Hospital, Imperial College Healthcare NHS  
17 Trust, London, United Kingdom.

18 3) CRUK Cambridge Institute and Cambridge Institute for Medical Research, University of  
19 Cambridge.

20 4) MRC Biostatistics Unit, Forvie Way, University of Cambridge.

21 5) Cambridge Institute of Therapeutic Immunology & Infectious Disease, University of  
22 Cambridge.

23 6) Health Data Research UK, London, UK.

24  
25 Correspondence to: James E. Peters. Email: [j.peters@imperial.ac.uk](mailto:j.peters@imperial.ac.uk)  
26

27 **Abstract**

28 End-stage kidney disease (ESKD) patients are at high risk of severe COVID-19. We  
29 measured 436 circulating proteins in serial blood samples from hospitalised and non-  
30 hospitalised ESKD patients with COVID-19 (n=256 samples from 55 patients). Comparison  
31 to 51 non-infected patients revealed 221 differentially expressed proteins, with consistent  
32 results in a separate subcohort of 46 COVID-19 patients. 203 proteins were associated with  
33 clinical severity, including IL6, markers of monocyte recruitment (e.g. CCL2, CCL7),  
34 neutrophil activation (e.g. proteinase-3) and epithelial injury (e.g. KRT19). Machine learning  
35 identified predictors of severity including IL18BP, CTSD, GDF15, and KRT19. Survival  
36 analysis with joint models revealed 69 predictors of death. Longitudinal modelling with linear  
37 mixed models uncovered 32 proteins displaying different temporal profiles in severe versus  
38 non-severe disease, including integrins and adhesion molecules. These data implicate  
39 epithelial damage, innate immune activation, and leucocyte-endothelial interactions in the  
40 pathology of severe COVID-19 and provide a resource for identifying drug targets.

41

42 **Introduction**

43 Coronavirus disease (COVID-19), caused by the SARS-CoV-2 virus, displays wide clinical  
44 heterogeneity from asymptomatic to fatal disease. Patients with severe disease exhibit  
45 marked inflammatory responses and immunopathology. The mechanisms underlying this  
46 remain incompletely characterised and the key molecular mediators are yet to be  
47 determined. The first treatment shown to reduce mortality from COVID-19 in randomised  
48 trials was dexamethasone [1], a corticosteroid which has broad non-specific effects on the  
49 immune system. Even with corticosteroid treatment, mortality in severe COVID-19 remains  
50 significant. There is a wide armamentarium of existing drugs that target inflammation more  
51 selectively, providing potential repurposing opportunities for the treatment of COVID-19.  
52 Recently, the REMAP-CAP trial has demonstrated efficacy of anti-IL6 receptor blockade in  
53 patients admitted to intensive care units with severe disease [2]. In order to select the most  
54 promising agents for future trials, we urgently need to better understand the molecular  
55 drivers of severe disease. Proteins are the effector molecules of biology and the targets of  
56 most drugs. Therefore, proteomic profiling to identify the key mediators of severe disease  
57 provides a valuable tool for identifying and prioritising potential drug targets [3].

58

59 Risk factors for severe or fatal COVID-19 include age, male sex, non-European ancestry,  
60 obesity, diabetes mellitus, cardiovascular disease, and immunosuppression [4]. End-stage  
61 kidney disease (ESKD) is one of the strongest risk factors for severe COVID-19 (estimated  
62 hazard ratio for death 3.69) [4], and ESKD patients hospitalised with COVID-19 have a  
63 mortality of approximately 30% [5–8]. ESKD patients have a high prevalence of vascular and

64 cardiometabolic disease (e.g. hypertension, ischaemic heart disease, diabetes), either as a  
65 result of the underlying cause of their renal disease or as a consequence of renal failure. In  
66 addition, ESKD results in both relative immunosuppression and chronic low-grade  
67 inflammation, which may impact viral defence and the host inflammatory response.

68

69 Here we performed proteomic profiling of serial blood samples of ESKD patients with  
70 COVID-19, leveraging the unique opportunity for longitudinal sampling in both the outpatient  
71 and inpatient settings afforded by a large multi-ethnic haemodialysis cohort (**Figure 1a**).  
72 These data revealed 221 proteins that are dysregulated in COVID-19 versus matched non-  
73 infected ESKD patients. Using linear mixed models, joint models and machine learning, we  
74 identified proteins that are markers of COVID-19 severity and risk of death. Finally, we  
75 characterised the temporal dynamics of the blood proteomic response during COVID-19  
76 infection in ESKD patients, uncovering 32 proteins that display altered trajectories in patients  
77 with severe versus non-severe disease.

78

## 79 **Results**

80 We recruited 55 ESKD patients with COVID-19 (subcohort A; **Table 1**). All patients were  
81 receiving haemodialysis prior to acquiring COVID-19. Blood samples were taken as soon as  
82 feasible following COVID-19 diagnosis. At time of initial sample, 30 patients were outpatients  
83 attending haemodialysis sessions and 25 were hospitalised inpatients (**Methods, Figure 1**).  
84 Following the initial blood sample, serial sampling was performed for 51/55 patients. We also  
85 recruited 51 non-infected haemodialysis patients as ESKD controls, mirroring the age, sex  
86 and ethnicity distribution of the COVID-19 cases (**Figure 1 figure supplement 1a-c**). We  
87 used the Olink proteomics platform to measure 436 proteins (**Supplementary File 1a**) in  
88 256 plasma samples from the COVID-19 patients and the 51 control samples. The proteins  
89 measured consisted of 5 multiplex 'panels' focussed on proteins relevant to immuno-  
90 inflammation, cardiovascular and cardiometabolic disease. The 436 proteins assayed  
91 showed strong enrichment for immune-related proteins (**Supplementary File 1b**).

92

93 In addition, we performed the Olink proteomic assays in 52 serum samples from a separate  
94 set of 46 COVID-19 positive ESKD patients (subcohort B), and 11 serum samples from  
95 ESKD COVID-19 negative controls (a subset of the controls described above). For the large  
96 majority of patients only a single timepoint was available. A higher proportion of these  
97 patients (41/46, 89%) were hospitalised and had severe disease (**Table 2**) than in subcohort  
98 A (**Figure 1, Table 1**).

99

100 Proteomic differences between COVID-19 positive and negative ESKD patients

101 Principal components analysis (PCA) of proteomic data from subcohort A demonstrated  
102 differences between samples from COVID-19 positive cases and controls, although the two  
103 groups did not separate into discrete clusters (**Figure 2a-b**). To examine the effects of  
104 COVID-19 on the plasma proteome, we performed a differential expression analysis in  
105 subcohort A between COVID-19 cases (n=256 samples passing quality control from 55  
106 patients) and non-infected ESKD controls (n=51) using linear mixed models, which account  
107 for serial samples from the same individual (**Methods**). This revealed 221 proteins  
108 associated with COVID-19 (5% false discovery rate, FDR); the vast majority were  
109 upregulated, with only 40 downregulated (**Figure 3a, Supplementary File 1c**). In order to  
110 provide a succinct and standardised nomenclature, we report proteins by the symbols of the  
111 genes encoding them (see **Supplementary File 1a** for a mapping of symbols to full protein  
112 names). The most strongly upregulated proteins (in terms of fold change) were DDX58,  
113 CCL7, IL6, CXCL11, KRT19 and CXCL10, and the most strongly downregulated were  
114 SERPINA5, CCL16, FABP2, PON3, ITGA11 and MMP12 (**Figure 3 figure supplement 1**).  
115 Notably, many of the upregulated proteins were chemotaxins.

116

117 We observed that a high proportion of the measured proteins were associated with COVID-  
118 19. Given the highly targeted nature of the Olink panels that we used (enriched for immune  
119 and inflammation-related proteins), this was not surprising. Nevertheless, to ensure that the  
120 Benjamini-Hochberg adjustment of p-values was controlling the false discovery rate at the  
121 5% level, we performed two additional analyses (**Methods**). First, we estimated the FDR  
122 using an alternative method (the plug-in method of Tibshirani [9]); this confirmed appropriate  
123 FDR control. Second, we used permutation to estimate the distribution of the number of  
124 proteins expected to be declared significant under the null hypothesis of no association  
125 between any proteins and COVID-19. This showed that the probability of observing the  
126 number of differentially abundant proteins we identified was highly unlikely under the null  
127 (empirical  $p < 1 \times 10^{-5}$ ; **Figure 3 figure supplement 2**).

128

129 Although our COVID-19 negative controls were well matched in terms of age, sex and  
130 ethnicity (**Figure 1 figure supplement 1a-c**), perfect matching of comorbidities was not  
131 feasible in the context of the healthcare emergency at the time of patient recruitment. There  
132 was a higher prevalence of diabetes in the COVID-19 cases compared to the controls (61.8  
133 % versus 47.1%, respectively; **Table 1**). To evaluate whether differing rates of diabetes had  
134 impacted the proteins identified as differentially abundant between cases and controls, we  
135 performed a sensitivity analysis adding diabetes as an additional covariate in the linear  
136 mixed model. This did not materially affect our findings; estimated effect sizes and  $-\log_{10}$  p-  
137 values from models with and without the inclusion of diabetes were highly correlated

138 (Pearson  $r > 0.99$ , and  $r = 0.95$ , respectively; **Figure 3 figure supplement 3a-b**). Full results  
139 from both models are shown in **Supplementary File 1c**. Similarly, there were also  
140 differences in the underlying cause of ESKD in cases compared controls (**Table 1**). We  
141 therefore performed a further sensitivity analysis adjusting for underlying cause of renal  
142 failure. This did not make any meaningful difference to our results (**Figure 3 figure**  
143 **supplement 3c-d, Supplementary File 1c**).

144

145 We also considered the possibility that timing of haemodialysis might affect the plasma  
146 proteome. To minimise the impact of this, all samples were taken prior to haemodialysis. For  
147 the large majority (86.6%) of samples, the most recent haemodialysis was between 48 and  
148 72 hours prior to blood draw. This consistency in timing of blood sampling reduces the  
149 potential for impact of this issue. Nevertheless, to evaluate whether timing of haemodialysis  
150 might have impacted our results, we performed a sensitivity analysis including time from last  
151 haemodialysis as a covariate. Our results were not materially affected by this, with  $-\log_{10}$  p-  
152 values and estimated effect sizes very highly correlated with those obtained without inclusion  
153 of this covariate (Pearson  $r > 0.99$  for effect size estimates and for  $-\log_{10}$  p-values; **Figure 3**  
154 **figure supplement 4a-b, Supplementary File 1c**).

155

156 We used the smaller subcohort B ( $n=52$  serum samples from 46 patients with COVID-19;  
157 **Methods**) for validation. We first projected the data from subcohort B into the PCA space of  
158 subcohort A to examine how well the separation of cases and controls in the PCA space  
159 replicated (**Methods**). This revealed clearer separation of infected and non-infected patients  
160 than in subcohort A (**Figure 2c-d**), perhaps reflecting the higher proportion of hospitalised  
161 patients (41 of 46 patients) in subcohort B (**Table 2**). We next performed differential  
162 abundance analysis in subcohort B and found 201 proteins that were dysregulated in cases  
163 versus controls (5% FDR) (**Supplementary File 1c**). Of the 221 differentially abundant  
164 proteins from subcohort A, 150 (69.7%) were also identified in subcohort B at 5% FDR  
165 (**Figure 4a**). Effect sizes in each dataset showed a strong correlation ( $r=0.80$ , **Figure 4b**).  
166 This demonstrates that our findings are highly reproducible despite differences in sample  
167 sizes and blood materials (plasma versus serum in subcohort A and B, respectively).

168

#### 169 Proteins associated with COVID-19 severity

170 Examination of the principal components plot labelling samples by clinical severity at the  
171 time of sampling (defined by WHO severity scores, graded as mild, moderate, severe or  
172 critical) demonstrated a gradient of COVID-19 severity, best captured by principal  
173 components 1 and 3 (**Figure 2 figure supplement 1a**). To determine the proteomic effects

174 of COVID-19 severity, we tested for associations between proteins and WHO severity score  
175 at the time of blood sampling, using linear mixed models with severity encoded as an ordinal  
176 predictor (**Methods**). This analysis revealed 203 proteins associated with severity (**Figure**  
177 **3b, Supplementary File 1d**). The majority of these were upregulated in more severe  
178 disease, with only 42 down-regulated. A sensitivity analysis adjusting for time since last  
179 haemodialysis, made no significant impact on our results (**Figure 3 figure supplement 4c-**  
180 **d, Supplementary File 1d**). Consistent with previous reports, we found that severe COVID-  
181 19 was characterised by elevated IL6. In addition, we observed a signature of upregulated  
182 monocyte chemokines (e.g. CCL2, CCL7, CXCL10), neutrophil activation and degranulation  
183 (e.g. PRTN3, MPO) and epithelial injury (e.g. KRT19, AREG, PSIP1, GRN). (**Figure 3b,c,**  
184 **Figure 5**). SERPINA5 and leptin showed the greatest downregulation as COVID-19 severity  
185 increased (**Figure 3b,c**).

186

187 We next asked how does the COVID-19 severity protein signature relate to the proteins that  
188 are differentially abundant between cases and controls? The majority (140/203; 69%) of  
189 severity-associated proteins were also identified as differentially abundant in the COVID-19  
190 positive versus negative analysis (**Figure 6a**). Log fold changes for proteins in COVID-19  
191 versus non-infected patients were correlated with effect sizes in the severity analysis, such  
192 that the proteins most upregulated in cases versus controls also tended to show the greatest  
193 upregulation in severe disease (**Figure 6b**). However, there were some notable exceptions  
194 (eg CCL20, IL17C, OSM) that were strongly associated with severity but not differentially  
195 expressed in infected versus non-infected patients (**Figure 6c**).

196

#### 197 Supervised learning to predict COVID-19 severity

198 Principal components analysis revealed that some samples from patients who had mild or  
199 moderate disease at the time of sampling clustered with samples from patients with severe  
200 disease (**Figure 2 figure supplement 1a**). Examination of the same PCA plot this time  
201 labelling samples according to the patient's overall clinical course (measured by peak WHO  
202 severity score over the duration of the illness) (**Figure 2 figure supplement 1b**), revealed  
203 that these samples came from individuals who subsequently developed severe or critical  
204 disease. This suggested that molecular changes may predate clinical deterioration. To  
205 evaluate this further, we used supervised learning approaches to test if the proteomic  
206 signature of the first blood sample for each patient in our dataset could identify whether the  
207 patient either had clinically severe COVID-19 at the time of sampling or would develop  
208 severe disease in the future. Whereas differential expression analyses consider each protein  
209 marker separately, machine learning techniques allow examination of all proteins  
210 concurrently, thus capturing non-linear relationships in the dataset. Using Random Forests,

211 we trained a classifier on the first sample for each COVID-19 patient to predict the overall  
212 clinical course, defined by peak WHO severity. For the purposes of this analysis, we  
213 binarised clinical course into either WHO mild/moderate or severe/critical.

214

215 The Random Forests method achieved 71% accuracy in predicting peak severity. By  
216 contrast, using only clinically available predictors (demographics, comorbidities and clinical  
217 laboratory results), the Random Forests method achieved 66% accuracy in predicting peak  
218 severity. Combining clinical parameters plus proteins did not improve accuracy (71%)  
219 compared to using proteomic predictors alone, suggesting that the information contained in  
220 the clinical predictors is captured at the proteomic level. While we do not believe that  
221 proteomic profiling is likely to enter clinical practice for risk stratification during this  
222 pandemic, the features selected by the classifier can highlight proteins of biological  
223 importance. We therefore interrogated the model to identify key proteins by calculating  
224 feature importance metrics (**Methods, Supplementary File 1e**). The most important  
225 proteins for indicating the presence of current or future severe disease were IL18BP, CTSD  
226 (Cathepsin D), GDF15, KRT19, TNFSF11 and IL1RL1 (ST2) (**Figure 7a**). It is notable that  
227 through this distinct analytical approach, KRT19 again emerged as a key biomarker of  
228 severe disease.

229

#### 230 Proteins associated with risk of death

231 9/55 patients in subcohort A died. We therefore sought to identify proteins associated with  
232 risk of death. To leverage the dynamic nature of repeated protein measurements for  
233 prediction of death, we utilised joint models, which combine linear mixed models and Cox  
234 proportional hazards models [10,11] (**Methods**). This analysis identified 44 proteins for  
235 which increased concentration was associated with increased risk of death (**Figure 7b,**  
236 **Supplementary File 1f**), including CST3, IL22RA1, AZU1, CCL28 and SPON1, and 25  
237 proteins for which increased concentration was associated with reduced risk of death,  
238 including CD84, TNFSF12, TANK, PRKCQ and ADM.

239

#### 240 Associations with clinical laboratory tests

241 A number of routine clinical laboratory tests have well characterised associations with  
242 COVID-19 (e.g. elevated inflammatory markers, d-dimer and reduced lymphocyte count)  
243 [12]. We therefore compared our proteomic data from COVID-19 patients at each timepoint  
244 to contemporaneous clinical laboratory measurements using linear mixed models  
245 (**Methods**). We found associations between plasma proteins and all clinical laboratory  
246 measurements except troponin (**Figure 8, Supplementary File 1g**). Many of these proteins  
247 were also markers of severity (e.g. IL6, KRT19, IFN-gamma and CXCL10 were strongly

248 associated with raised CRP and ferritin and reduced lymphocyte counts). Of note CCL7, a  
249 monocyte chemokine that was also identified as an important marker of severity by the  
250 Random Forests classifier, was associated with lower monocyte count and raised  
251 inflammatory markers. Elevated neutrophil count was associated with Oncostatin-M, which  
252 regulates IL6, GCSF and GMCSF production, and with the proteases MMP9 and defensin.

253

#### 254 Longitudinal analysis reveals proteins with distinct temporal profiles according to severity

255 The immune response to infection is dynamic, and therefore snapshot measurements  
256 provide only partial insights. Leveraging the dense serial sampling in our dataset (**Figure 1**),  
257 we modelled the temporal trajectory of each protein and asked whether or not any protein  
258 trajectories differed in patients with a severe/critical versus mild/moderate overall clinical  
259 course. This was achieved using linear mixed models that included a term for time from first  
260 symptoms and a time x severity interaction term (**Methods**).

261

262 178 proteins displayed a significant association with time from first symptoms (5% FDR),  
263 demonstrating the temporal variability in plasma proteins across the disease course  
264 (**Supplementary File 1h**). Moreover, we identified 32 proteins for which there was  
265 significant interaction between time and severity, i.e. proteins displaying differential temporal  
266 trajectories between mild/moderate and severe/critical infections (**Supplementary File 1h**,  
267 **Figure 9**). Among the proteins with the strongest temporal differences according to clinical  
268 course were the integrins ITGA11 and ITGB6, the adhesion molecule ICAM1, TNFRSF10B  
269 (a receptor for TRAIL) and PLAUR, the receptor for urokinase plasminogen activator. Most  
270 of these proteins exhibited rising profiles in the more severe patients but flat profiles in milder  
271 cases. ACE2, the receptor for SARS-CoV-2, also displayed this pattern (**Figure 9**). In  
272 contrast, abundance of ITGA11, which was also identified as reduced in the analysis of  
273 infected versus non-infected patients, fell over time in the severe group.

274

#### 275 Testing for proteins associated with ethnicity

276 In the UK, individuals from ethnic minorities are at higher risk of severe disease and death  
277 from COVID-19 [4]. We therefore examined whether any of the proteins we measured  
278 exhibited differences across ethnicities, analysing COVID-19 positive cases and controls  
279 separately (**Methods**). In COVID-19 negative ESKD patients, no proteins were significantly  
280 associated with ethnicity in a multivariable model adjusting for age and sex. In COVID-19  
281 positive ESKD patients, there is the potential for protein associations with ethnicity to be  
282 confounded by disease severity. To account for this, we included severity as well as age and  
283 sex as covariates. A single protein, LY75, was associated with ethnicity in this multivariable  
284 model (nominal P 0.0001, Benjamini-Hochberg adjusted P 0.04, with higher levels in white



285 patients). Using the same within cases analysis strategy in subcohort B, we found no  
286 proteins were significantly associated with ethnicity after multiple testing correction, although  
287 the nominal P value for LY75 was 0.025. While these analyses failed to identify substantial  
288 ethnicity-related variation in the proteins we measured, an important caveat is that there  
289 were relatively modest numbers of individuals from each ethnic group, and so statistical  
290 power was limited. Larger multi-ethnic studies are needed to adequately address this  
291 question.

292

### 293 Comparisons to other proteomic studies in COVID-19

294 Other studies have used a variety of proteomic platforms to investigate COVID-19. We  
295 compared our findings to those of 3 published studies [13–15] and a preprint by Filbin *et al*  
296 [16]. Of the 221 proteins that were differentially abundant in our analysis of COVID-19  
297 positive versus negative ESKD patients, 116 associations had been previously reported  
298 (**Supplementary File 1i**). Of the 203 proteins associated with severity, 165 had previously  
299 been reported (**Supplementary File 1j**).

300

301 We focussed in more detail on the study by Filbin *et al* [16] because of the large sample size  
302 and the breadth of proteomic assay used. This study comprised 384 patients with acute  
303 respiratory distress (306 COVID-19 positive and 79 COVID-19 negative), and measured  
304 1,472 proteins using the Olink Explore platform. 417 of these were also measured in our  
305 study. Of the 221 proteins differentially abundant in our case/control analysis, 210 were  
306 measured in their study. Of these 100 (47.6%) were significant in their analysis of COVID-19  
307 positive versus negative respiratory distress. In addition, we observed strong correlation  
308 ( $r=0.69$ ) between the estimated log fold changes in our and their studies (**Figure 4 figure**  
309 **supplement 1**). Of the 203 proteins associated with severity in our study, 192 were  
310 measured in their study. 157 of these were significantly associated with severity, giving a  
311 concordance of 81.8%. Thus, despite the differences in study design and clinical  
312 populations, we observed notable similarities in our results and those reported by Filbin *et al*  
313 [16].

314

### 315 **Discussion**

316

317 In this study we performed plasma proteomic profiling of haemodialysis patients with COVID-  
318 19. A strength of our study was that we were able to perform serial blood sampling in both  
319 the outpatient and inpatient setting, including longitudinal samples from the same individual  
320 before and after hospitalisation. This was possible because haemodialysis patients are  
321 unable to fully isolate as they must continue to attend for regular dialysis sessions.

322 Moreover, haemodialysis patients represent an important group since ESKD is one of the  
323 strongest risk factors for death from COVID-19 [4,6–8]. Data from the UK Renal Registry  
324 shows that 7- and 14-day mortality for COVID-19 infected in-centre haemodialysis patients  
325 was 11% and 19%, respectively [17]. Data from the Scottish Renal Registry estimates 30-  
326 day mortality following a positive COVID-19 test as 22%, and as of 31 May 2020, 28.2% of  
327 renal replacement therapy patients who had a positive COVID-19 test had died [18]. In our  
328 local population of 1,352 in-centre haemodialysis patients, 315 patients had tested positive  
329 for COVID-19 by the end of our study period (31 May 2020), of whom 53% required  
330 hospitalisation and 85 (27%) died. The OpenSAFELY study [4] examined ~17 million UK  
331 primary care records and linked these to the UK COVID-19 mortality register. Patients with  
332 estimated glomerular filtration rate (eGFR)  $<30\text{ml/min/1.73m}^2$  had a hazard ratio (HR) for  
333 death of 3.56 after adjustment for age and sex.

334

335 In part, the high mortality from COVID-19 in ESKD patients likely reflects the fact that these  
336 patients are enriched for cardiometabolic traits that predispose to severe COVID-19.  
337 However, in multivariable analyses adjusting for these factors, impaired renal function  
338 remains an independent risk factor for severe COVID-19 [4]. Moreover, there is an inverse  
339 relationship between renal function and risk of death from COVID-19 across the spectrum of  
340 chronic kidney disease. These observations support the notion that the state of ESKD *per se*  
341 is an important determinant of outcome in COVID-19. ESKD is well recognised as an  
342 immunosuppressed state [19–21], with defects in both innate and adaptive immunity [22–  
343 25]. Accordingly, ESKD confers increased vulnerability to viral infections including influenza  
344 and respiratory syncytial virus [26–29]. In addition, ESKD results in a chronic low-grade  
345 inflammatory state [30]. This tendency to a pro-inflammatory state, combined with reduced  
346 ability to respond to viruses, may contribute to the abnormal host response to SARS-CoV-2  
347 infection, producing the immunopathology that leads to severe COVID-19.

348

349 Our comparison of COVID-19 positive and negative haemodialysis patient plasma samples  
350 revealed 221 proteins that were differentially abundant in COVID-19. The majority of these  
351 were upregulated, with strong representation of viral response proteins (e.g. DDX58, IFNG),  
352 cytokines/chemokines (e.g. IL6, CCL7, CXCL10 and CXCL11) and epithelial proteins (e.g.  
353 KRT19, PSIP1) (**Figure 3a**). The COVID-19 negative controls in this analysis were carefully  
354 matched to cases in terms of age, sex and ethnicity. However, complete matching of clinical  
355 characteristics was not feasible; there were differences in the prevalence of diabetes and the  
356 underlying causes of ESKD between COVID-19 positive cases and controls (**Table 1**).  
357 Sensitivity analyses adjusting for these covariates gave highly consistent results, indicating

358 that our findings are robust. In addition, we validated our findings when we analysed serum  
359 samples from a separate subcohort of COVID-19 positive ESKD patients.

360

361 ESKD is itself likely to significantly impact the plasma proteome. Previous cross-sectional  
362 studies have shown that the levels of many circulating proteins have an inverse relationship  
363 with eGFR [31,32]. A longitudinal study using an Olink proteomics panel (although not one  
364 used in our study) found that for 74% of the 84 proteins measured, protein levels rose as  
365 eGFR fell [33]. For many proteins, it is unclear whether this inverse relationship with renal  
366 function reflects cause or effect. Some proteins may be increased in chronic kidney disease  
367 due to reduced renal clearance, some may be elevated secondary to tissue injury or chronic  
368 inflammation, and others may be drivers of renal injury. Regardless, this observation of  
369 widespread changes in the blood proteome of kidney disease patients emphasises the  
370 importance of using COVID-19 ESKD patients rather than healthy individuals as our control  
371 group.

372

373 Analysis within COVID-19 cases revealed 203 proteins associated with disease severity, the  
374 strongest of which was IL6 (**Figure 3b**). Association of IL6 with severe disease is well-  
375 established and has already received considerable attention [34,35]. Despite promising initial  
376 case reports of IL6R receptor blockade in COVID-19, convincing efficacy was not  
377 demonstrated in early randomised trials [36]. More recently, the REMAP-CAP trial has  
378 shown the benefit of anti-IL6R therapy when given to critically ill patients on admission to  
379 intensive care units [2], indicating that IL6 does contribute to critical illness from COVID-19.  
380 Our finding that IL6 was most strongly upregulated in severe disease demonstrates the  
381 value of plasma proteomic profiling in identifying putative drug targets.

382

383 Members of the CCL and CXCL chemokine families (e.g. CCL2, CCL7, CCL20 and  
384 CXCL10) were strongly associated with severity. Likewise, higher levels of CCL2, CCL7,  
385 CCL20 and CXCL10 were associated with lower blood lymphocyte count and higher  
386 inflammatory markers (CRP and ferritin) (**Supplementary File 1g**), which are clinical  
387 markers of severe disease and poorer outcome in COVID-19 [37]. Of note, CCL20 is a  
388 chemoattractant for lymphocytes [38], and its negative association with lymphocyte count  
389 may reflect a direct effect on migration of lymphocytes from the blood into the tissues rather  
390 than simply marking severe disease. CCL2 (also known as MCP-1) and CCL7 (MCP-3), are  
391 both chemokines for monocytes, and CXCL10 has pleiotropic immunological effects  
392 including chemotaxis. These chemokines were also negatively correlated with blood  
393 monocyte count, suggesting recruitment of these innate immune cells into damaged tissues.

394

395 The neutrophil proteases PRTN3 (proteinase-3) and MPO (myeloperoxidase) (**Figure 5**) and  
396 the neutrophil-derived protein AZU1 were associated with severe disease (**Supplementary**  
397 **File 1d**), indicating that neutrophil activation and degranulation are features of severe  
398 COVID-19. Degranulation of neutrophils releasing PRTN3 and MPO could potentially  
399 contribute to oxidative damage in the lungs and thus more severe disease.

400

401 A striking finding of our study was the association of disease severity with upregulation of  
402 epithelial proteins (e.g. KRT19) and epithelial tissue repair pathways (e.g. PSIP1, AREG,  
403 GRN (progranulin)), most likely reflecting lung and vascular damage. KRT19 was notably  
404 prominent in our analyses, as well as the study by Filbin *et al.* [16](**Supplementary File 1j**).  
405 KRT19 is an intermediate filament protein, important for the structural integrity of epithelial  
406 cells [39]. These data suggest that severe COVID-19 is characterised by destruction of the  
407 lung epithelium and vascular endothelium. Vascular injury might thus explain the high level  
408 of vascular thrombosis seen in patients in severe disease. In summary, our data reveal that  
409 severe COVID-19 is characterised proteomically by a signature of innate immune activation  
410 and epithelial injury.

411

412 69% of proteins associated with severity were also differentially abundant in the case versus  
413 control analysis (**Figure 6a**), and for the large majority of proteins the within-cases severity  
414 analysis effect size was proportional to the fold change between cases and controls (**Figure**  
415 **6b**). This suggests that, in general, the distinction in the plasma proteome between severe  
416 and mild COVID-19 is a quantitative difference in the COVID-19 signature, rather than there  
417 being an orthogonal signature involving a different set of proteins. Consistent with this  
418 concept, examination of PCA plots coloured by severity revealed that while there was a  
419 gradient of COVID-19 severity, the samples from severe or critical patients did not form a  
420 discrete cluster distinct from those from patients with milder disease (**Figure 2 figure**  
421 **supplement 1**). However, there were a few exceptions where proteins that were associated  
422 with severity were not upregulated in the case-control analysis. These included OSM, IL17C,  
423 and CCL20 (**Figure 6c**). These proteins therefore reflect biological processes specifically of  
424 severe disease and may represent therapeutic targets.

425

426 Survival analysis identified 44 proteins associated with increased risk of death (**Figure 7b**).  
427 As expected, many of these were also associated with disease severity, high CRP and lower  
428 lymphocyte count (**Figure 7 figure supplement 1**). In contrast, 25 proteins were associated  
429 with reduced risk of death (**Figure 7b**). One such protein is the multi-functional cytokine  
430 TNFSF12 (TWEAK). Although TWEAK can exert pro-inflammatory effects, it also can inhibit  
431 the innate immune response [40] and promote tissue repair and endothelial cell proliferation

432 and survival [41], which may be beneficial responses in COVID-19. This illustrates that  
433 although proteins associated with inflammation are often thought to be destructive, the  
434 inflammatory response also induces a programme for limiting injury and initiating tissue  
435 repair. Insufficient activation of such homeostatic mechanisms may contribute to why some  
436 individuals get severe COVID-19.

437

438 The host immune response to COVID-19 is a dynamic process, and clinical deterioration  
439 typically occurs 7-10 days after first symptoms. Temporal information may therefore be  
440 important in determining optimum timing of therapeutic intervention (e.g. blockade of a  
441 particular cytokine). By taking serial samples and examining their patterns within individuals  
442 over time, we were able to model protein trajectories and found that many proteins display  
443 temporal variability during COVID-19. Longitudinal measurements also allow molecular  
444 comparison of severe versus mild disease trajectories. By modelling the interaction term  
445 between time from first symptoms and overall disease course, we found 32 proteins that  
446 displayed distinct temporal profiles in severe vs mild disease. These results point to  
447 enhanced leucocyte-endothelial cell interactions indicated by upregulation of cell adhesion  
448 molecules (e.g. ITGB6, ICAM1) in severe disease. This endothelial activation may contribute  
449 to COVID-19-associated thrombosis discussed above. Management of thrombosis in  
450 COVID-19 currently consists of anticoagulation. Our results suggest that disrupting  
451 leucocyte-endothelial interactions may be a complementary therapeutic strategy.

452

453 Several proteins associated with either risk of death or clinical severity lie in pathways  
454 targeted by existing drugs. PARP1 was identified as an important marker of current or future  
455 severe COVID-19, and also was associated with risk of death. PARP1 is associated with  
456 inflammatory and vascular disease [42]. PARP1 inhibitors are in use for cancer [43], and our  
457 data suggest that re-purposing of PARP1 inhibition in COVID-19 should be explored further.  
458 IL33 was associated with both risk of death and clinical severity, and its receptor IL1RL1  
459 (ST2) was associated with clinical severity and identified as an important predictor of severe  
460 clinical course. Monoclonal antibodies against IL33 and its receptor are in late-stage  
461 development for asthma [44], and could also be explored in COVID-19. As discussed above,  
462 MPO was associated with clinical severity. MPO inhibitors [45] might have a role in reducing  
463 neutrophil-mediated tissue injury in COVID-19. Finally, inhibitors of monocyte chemokines  
464 (e.g. CCL2) and their receptors have been developed [46,47], although drugging these  
465 pathways is made more challenging by molecular cross-talk. An important caveat is that we  
466 cannot determine whether the associations we observed are drivers of pathology in COVID-  
467 19 or simply reflect the downstream consequences of inflammation and tissue injury. Future

468 studies using Mendelian randomisation analysis will provide a useful tool for assessing  
469 causality and prioritizing drug targets.

470

471 Other groups have studied the plasma or serum proteome in COVID-19 [13–16,48], using  
472 either mass spectrometry or immunoassays including the Olink platform. Mass spectrometry  
473 is less sensitive than immunoassays and so it likely to be unable to detect many of the  
474 cytokines measured here. Conversely, it can provide complementary information by  
475 measuring many proteins that our immunoassays did not target. A limitation of our study was  
476 that we used Olink panels that measured specific proteins selected on their relevance to  
477 inflammation, immunity, cardiovascular and metabolic disease. This bias precluded formal  
478 pathway enrichment analysis. In general, our results had greater similarities to studies that  
479 used immunoassays over mass spectrometry (**Supplementary File 1i-j**). 47.6% of proteins  
480 differentially expressed in COVID-19 positive versus negative ESKD patients in our study  
481 were differentially expressed in COVID-19 positive versus negative acute respiratory distress  
482 syndrome patients in the study of Filbin et al [16], who used a different Olink proteomics  
483 platform. Moreover, we observed consistent effect sizes (**Figure 4 figure supplement 1**).  
484 These similarities are striking given the difference in clinical populations and control groups;  
485 in Filbin *et al's* report the controls included patients with non-COVID-19 respiratory infections  
486 whereas our control group did not have active infection. The concordance in proteins  
487 associated with COVID-19 severity within cases was even higher (81.8%). The similarities  
488 suggests a similar plasma proteomic signature of COVID-19 across different clinical  
489 populations, particularly the signature associated with severity.

490

491 In summary, this study reveals proteins associated with COVID-19 infection and severity,  
492 and demonstrates altered dynamic profiles between patients with severe disease and those  
493 with a more indolent course. Our results emphasise the importance of studying and targeting  
494 mechanisms that reduce the lung epithelial and endothelial damage to both alleviate the  
495 severity of the infection and to reduce the chance of long-lasting complications. These data  
496 provide a valuable resource for therapeutic target prioritisation.

497

## 498 **Materials and Methods**

499

### 500 Subjects and samples

501 *Ethical approval:* All participants (patients and controls) were recruited from the Imperial  
502 College Renal and Transplant Centre and its satellite dialysis units, London, and provided  
503 written informed consent prior to participation. Study ethics were reviewed by the UK  
504 National Health Service (NHS) Health Research Authority (HRA) and Health and Care

505 Research Wales (HCRW) Research Ethics Committee (reference 20/WA/0123: The impact  
506 of COVID-19 on patients with renal disease and immunosuppressed patients). Ethical  
507 approval was given.

508

509 *Subcohort A:* We recruited 55 COVID-19 positive haemodialysis patients, either as  
510 outpatients or as inpatients (**Table 1**). All patients were receiving in-centre outpatient  
511 haemodialysis prior to COVID-19 diagnosis. COVID-19 was confirmed in all cases with  
512 positive nasal PCR for the SARS-CoV-2 virus. Patients were recruited during the first UK  
513 national lockdown, with recruitment from 8<sup>th</sup> April – 30<sup>th</sup> May 2020. Blood was collected in  
514 EDTA tubes and centrifuged to obtain plasma, and stored at –80°C. Sample processing was  
515 performed within 4 hours of venepuncture. The initial sample was taken as an outpatient for  
516 30 patients and as an inpatient for 25. Where feasible, serial blood samples were taken. In  
517 total, 259 samples were taken (3 subsequently failed QC – see below). The median number  
518 of serial samples was 5 (range 1-10) (**Figure 1 figure supplement 1d**). 8 patients who were  
519 recruited as outpatients were subsequently admitted to hospital with COVID-19 over the  
520 course of the study. 27 of 55 (49.1%) patients had severe or critical disease (defined by  
521 peak WHO severity). 9 (16.4%) patients died.

522

523 In addition, we recruited 51 COVID-19 negative haemodialysis controls. COVID-19 negative  
524 haemodialysis controls were selected to mirror the cases in terms of demographic features  
525 (age, sex, ethnicity) (**Figure 1 figure supplement 1a-c**). These control patients had no  
526 clinical features of any other infection.

527

528 *Subcohort B:* We also recruited a separate set of 46 COVID-19 positive haemodialysis  
529 patients (**Table 2**). These patients were recruited from the same centre, but slightly earlier  
530 than subcohort A (recruitment commenced on 30<sup>th</sup> March 2020). For these patients, blood  
531 was collected in serum tubes and centrifuged to obtain serum. At this time, we had very  
532 limited access to laboratory facilities and so plasma was not collected from these patients. 5  
533 were outpatients and 41 were inpatients, reflecting the fact that UK policy was weighted  
534 towards inpatient testing at the time these patients were recruited. 33 of 46 patients (71.7%)  
535 had severe or critical disease (by peak WHO severity), and 9 (19.6%) patients died. For 40  
536 patients, only one sample from a single timepoint was collected, and for 6 patients, 2  
537 samples were collected. To provide controls for subcohort B, we used serum samples from  
538 11 non-infected haemodialysis patients (collected at the same time as plasma from a subset  
539 of the ESKD control group described above).

540

541 Clinical severity scores

542 Severity scoring was performed based on WHO classifications (WHO clinical management  
543 of COVID-19: Interim guidance 27 May 2020) adapted for clinical data available from  
544 electronic medical records. ‘Mild’ was defined as COVID-19 symptoms but no evidence of  
545 pneumonia and no hypoxia. ‘Moderate’ was defined as symptoms of pneumonia or hypoxia  
546 with oxygen saturation (SaO<sub>2</sub>) greater than 92% on air, or an oxygen requirement no greater  
547 than 4L/min. ‘Severe’ was defined as SaO<sub>2</sub> less than 92% on air, or respiratory rate more  
548 than 30 per minute, or oxygen requirement more than 4L/min. ‘Critical’ was defined as organ  
549 dysfunction or shock or need for high dependency or intensive care support (i.e. the need for  
550 non-invasive ventilation or intubation). Severity scores were charted throughout a patient’s  
551 illness. We defined the overall severity/clinical course for each patient as the peak severity  
552 score that occurred during the patient’s illness.

553

#### 554 Proteomic assays

555 Plasma and serum proteomic measurements were performed using Olink proximity  
556 extension immunoassays (<https://www.olink.com/products/>). Five 92-protein multiplex Olink  
557 panels were run (‘inflammation’, ‘immune response’, ‘cardiometabolic’, ‘cardiovascular 2’ and  
558 ‘cardiovascular 3’), resulting in 460 measurements per sample. Since a small number of  
559 proteins were measured on more than one panel, we measured a total of 436 unique  
560 proteins. The Olink assays were run using 88 samples/plate. All plates were run in a single  
561 batch. Plate layouts was carefully designed to avoid confounding of potential plate effects  
562 with biological or clinical variables of interest. To achieve this, we used an experimental  
563 design that combined ensuring case/control balance across plates with random selection of  
564 samples from each category and random ordering of allocation to wells. This is outlined in  
565 more detail as follows. We ensured that each plate contained a mixture of control and case  
566 samples. Specifically, a fixed proportion of each plate was designated for control samples.  
567 The allocation of specific control samples to each plate was performed using randomisation.  
568 For the case samples, we again used randomisation for plate assignment, with the constraint  
569 that once one sample from a given patient was allocated to a plate, all other longitudinal  
570 samples from that patient were assigned to same plate. Finally, once all the samples had  
571 been allocated to plates, the layout of samples within each plate was determined through a  
572 further randomisation step for well allocation.

573

#### 574 Protein annotation

575 We used the Human Protein Atlas version 20.0 [49] for protein annotation (**Figure 1 figure**  
576 **supplement 2**). We performed enrichment analysis of the 436 proteins that we measured  
577 using string-db [50].

578



579 Normalisation and quality assessment and control

580 The data was normalised using standard Olink workflows to produce relative protein  
581 abundance on a log<sub>2</sub> scale ('NPX'). Quality assessment was performed by a) examination of  
582 Olink internal controls, and b) inspection of boxplots, relative log expression (RLE) plots [51]  
583 and PCA. Following these steps, 3 poor quality samples were removed. In addition, 5  
584 samples failed quality control on a single proteomic panel only, with the remaining panels  
585 passing QC. For these samples, proteins on the panel that failed QC were set to missing,  
586 and the data for the remaining proteins was retained.

587

588 Principal components analysis revealed no substantial impact of plate effects (**Figure 2**  
589 **figure supplement 2**). 13 proteins were assayed more than once due to their inclusion in  
590 multiple Olink panels. For plasma, the median correlation between the assays was 0.986  
591 with an IQR of 0.974-0.993 and a range of 0.925 to 0.998. For serum, the median correlation  
592 between the assays was 0.991 with an IQR of 0.952-0.995 and a range of 0.737-0.999. We  
593 removed duplicate assays at random prior to subsequent analyses.

594

595 For 11 ESKD controls, we had contemporaneous plasma and serum samples. To assess the  
596 comparability of these two matrices, we calculated the Pearson's correlation coefficient  
597 between the assays for each protein (**Supplementary File 1k**). 344/436 (78.9%) of proteins  
598 had a Pearson's  $r > 0.5$ . We also report the variance of each protein in plasma and serum  
599 since low correlation may reflect low variance. The proteins with the lowest estimated  
600 Pearson correlation coefficient were AZU1, STK4 and TANK. We highlight that this  
601 comparison had small sample size (only 11 samples) and that the samples were from control  
602 patients without infection. Caution should be made in extrapolating these findings to the  
603 context of active infection where protein dynamic ranges may be different.

604

605 Missing values

606 Following QC, 0.22% data points were missing for the plasma dataset and 0.35% for the  
607 serum dataset. For analyses that required no missing values (PCA and supervised learning),  
608 we imputed missing values as follows. The dataset was first scaled and centred, and missing  
609 values imputed using caret's k-nearest neighbours (kNN) method [52]. The 5 closest  
610 samples (by Euclidean distance) were used to estimate each missing value.

611

612 Principal Components Analysis

613 Singular value decomposition was used to perform PCA on the proteomic data from  
614 subcohort A (plasma samples). We then used the loadings from subcohort A together with

615 the proteomic data from subcohort B to calculate principal components scores. This enabled  
616 projection of subcohort B data into the PCA space of subcohort A.

617

#### 618 Differential protein abundance analysis: COVID-19 positive versus negative

619 Differential protein abundance analyses between COVID-19 positive and negative samples  
620 were performed using linear mixed models, to account for the use of serial samples from the  
621 same individuals (R lme4 package [53]). This analysis compared 256 samples from 55  
622 COVID-19 patients with 51 non-infected patients (1 sample per non-infected patients). Age,  
623 sex and ethnicity were included as covariates. We used a random intercept term to estimate  
624 the variability between individuals in the study and account for repeated measures. The  
625 regression model in R notation was:

626 
$$\text{NPX} \sim \text{covid\_status} + \text{sex} + \text{age} + \text{ethnicity} + (1 \mid \text{individual})$$

627 where NPX represents the protein abundance and covid\_status was a categorical variable  
628 (infected/non-infected). Sex and ethnicity were also categorical variables. Age was a  
629 quantitative variable. We calculated P values using a type 3 F test in conjunction with  
630 Satterthwaite's method for estimating the degrees of freedom for fixed effects [54]. The  
631 regression model was fitted for each of the 436 proteins individually. Multiple testing  
632 correction was performed using the Benjamini-Hochberg method and a 5% FDR used for the  
633 significance threshold.

634

635 The same approach was used for subcohort B. This analysis comprised 52 serum samples  
636 from 46 COVID-19 positive patients versus 11 samples from non-infected patient samples (1  
637 sample per non-infected patient).

638

639 As sensitivity analyses, we repeated the differential abundance analyses between case and  
640 controls for the subcohort A adjusting for additional covariates and comparing this to the  
641 basic model (i.e. using age, sex, and ethnicity alone). This was performed for each of the  
642 following parameters: diabetes status, cause of ESKD, and time to last haemodialysis.

643

#### 644 Testing for associations between proteins and clinical severity

645 For testing the association of plasma proteins with the 4-level WHO severity rating (mild,  
646 moderate, severe and critical) within COVID-19 positive cases from subcohort A (n=256  
647 samples from 55 patients), we used a similar linear mixed modelling approach to the COVID-  
648 19 positive versus negative differential abundance analysis; for this analysis, the  
649 covid\_status term was replaced by a severity variable encoded using orthogonal polynomial  
650 contrasts to account for ordinal nature of severity levels. As before, age, sex and ethnicity

651 were included as covariates. As a sensitivity analysis, we repeated the analysis with time to  
652 last haemodialysis (days) as an additional covariate.

653

#### 654 Testing for associations between proteins and clinical laboratory tests

655 The linear mixed modelling strategy was also employed for testing association of temporal  
656 clinical laboratory variables and protein levels, with the value of the clinical variable (as a  
657 quantitative trait) used in place of covid\_status. Only COVID-19 positive patients were  
658 included in this analysis. Contemporaneous lab measurements were not available for all  
659 samples. This varied according to the clinical lab parameter. Some (eg troponin, d-dimer)  
660 were measured less frequently than full blood count and CRP. Details of the proportion of  
661 missing values for each lab parameter are included in (**Supplementary File 1g**). We also  
662 calculated correlations between clinical laboratory variables and protein levels using the R  
663 package rmcrr, which determines the overall within-individual relationship among paired  
664 measures that have been taken on two or more occasion [55].

665

#### 666 Testing for associations between proteins and ethnicity

667 We performed testing of protein levels and ethnicity separately in COVID-19 negative ESKD  
668 patients and COVID-19 positive ESKD patients. These analyses were limited to individuals  
669 who were White, South Asian (Indian, Pakistani or Bangladeshi ancestry) or Black as there  
670 were too few individuals from other ethnic groups for meaningful interpretation. For COVID-  
671 19 negative patients (1 sample per patient), we performed linear regression for each protein  
672 with ethnicity as the predictor variable, and age and sex as covariates. For COVID-19  
673 positive patients we used a linear mixed model to account for serial samples from the same  
674 individual, again with age, and sex as covariates.

675

#### 676 Multiple testing correction

677 We used the Benjamini-Hochberg method to control the FDR at 5% for all statistical  
678 analyses.

679

#### 680 Alternative estimation of the FDR using the plug-in method

681 To provide additional support that the Benjamini-Hochberg procedure was providing  
682 adequate control of the FDR, we also used the plug-in method of Tibshirani [9] as an  
683 alternative method to estimate the FDR, as described below.

684 1. We defined  $R$  as the number of associations declared significant in the real data.

685 2. We defined  $C$  as the test statistic used as the significance threshold used in the real data  
686 (i.e. that corresponding to an adjusted p-value of 0.05).

687 3. The expected number of proteins that we would find significant under the null hypothesis  
688 that no proteins are differentially abundant between COVID-19 positive versus negative  
689 patients (i.e. false positives) was estimated using a permutation strategy. We randomly  
690 permuted each individuals' COVID-19 status label 100,000 times and, in each case,  
691 repeated the differential abundance analysis on the permuted data. The estimated the  
692 number of false positives ( $\hat{V}$ ) was then estimated by the number of associations with test  
693 statistic  $> C$  in 100,000 permutations of the data, divided by the number of permutations.

694 4. The estimated FDR was then calculated as  $\hat{V}/R$ .

695

696 We implemented a similar approach for the testing the association of proteins with severity  
697 scores within cases.

698

699 Using this method, the estimated FDR for the case versus control analysis was 0.062 and for  
700 the severity analysis 0.057, indicating that we had appropriately controlled the FDR.

701

#### 702 Empirical p-value calculation

703 As a complementary analysis, based on the approach of Filbin *et al.* [16], we estimated the  
704 empirical P-value for the likelihood of observing as many significant proteins as we identified  
705 in the real data if the null hypothesis of no differentially abundant proteins in cases versus  
706 controls were true. We again used 100,000 permutations of the case control labels to  
707 estimate the null distribution. We performed Benjamini-Hochberg adjustment on the nominal  
708 p-values of each permutation, and counted the number of proteins that were significant  
709 (adjusted p-value  $< 0.05$ ) in each permutation.

710 The distribution of the number of proteins declared significant is shown in **Figure 3 figure**  
711 **supplement 2a**; on no occasion in 100,000 permutations did we observe more proteins  
712 declared significant than in the real data. We can thus state that the empirical P-value (the  
713 fraction of permutation runs where we observed  $\geq$  the number of associations in the real  
714 data) is less than  $1/100,000 = 1 \times 10^{-5}$ .

715

716 We also applied this method to the association testing of proteins with severity scores within  
717 cases (**Figure 3 figure supplement 2b**). Again, on no occasion in 100,000 permutations did  
718 we observe more proteins declared significant than in the real data (empirical p-value  $< 1 \times 10^{-5}$ ).  
719

720

#### 721 Supervised learning

722 Random forest models were fit using R's randomForest and caret packages [52,56]. Data  
723 was centred, scaled and imputed as in *Data Preparation* with the caveat that, during cross-  
724 validation, the pre-processing procedure was first applied on the resampled (training) data  
725 before the same method was applied without re-calculation to the holdout (test) set. To  
726 estimate model accuracy, we used 4-fold cross-validation. The cross-validation procedure  
727 was repeated 100 times. The model's parameters were kept constant at 500 trees and an  
728 mtry value (number of proteins randomly sampled as candidates at each node) calculated as  
729 the square root of the number of features. After parameter estimation, we fit a final model  
730 trained using the entirety of the dataset. This model was used for subsequent feature  
731 extraction. Random forest feature extraction was carried out using the R  
732 randomForestExplainer package. We made use of the following importance measures:  
733 accuracy decrease (the average decrease in prediction accuracy upon swapping out a  
734 feature), number of trees (the number of trees with a node corresponding to a feature) and  
735 mean minimal depth (the average depth at which a node corresponding to a feature occurs).  
736 Three models were generated with different input features: i) proteomic data alone; ii) clinical  
737 parameters alone; iii) proteomic data and clinical parameters. Clinical parameters included  
738 sex, age, ethnicity, cause of ESKD, comorbidities, smoking status, radiological evidence of  
739 pulmonary infiltrates, and clinical laboratory tests.

740

#### 741 Survival analysis using joint modelling

742 Following scaling and centering, we fit linear mixed models for each protein to capture the  
743 temporal trajectories of each individual. A polynomial spline of degree 2 was used to model  
744 protein concentration with respect to time (from symptom onset, measured in days); the  
745 spline was fitted for samples that were taken between 1 and 28 days from first symptoms,  
746 inclusive. Proteomic data after that point was censored. We estimated both random  
747 intercepts and random slopes for each individual, as per the following R formula notation:

748

$$\text{NPX} \sim \text{time} + (\text{time} \mid \text{individual})$$

749 These were joined to a Cox regression model using the jointModel package [11] in order to  
750 estimate the association of each protein with risk for death. P values were calculated using a  
751 Wald test for the association between the linear mixed model and Cox regression.  
752 Benjamini-Hochberg adjustment was applied, with an adjusted p-value of 0.05 used as the  
753 significance threshold.

754

#### 755 Longitudinal analysis

756 We also used linear mixed models to estimate the temporal profile of each protein. For this  
757 longitudinal analysis we explicitly modelled the time from first symptoms. We set up the

758 model to test for each protein a) whether the protein significantly change over time and b)  
759 whether the protein changes over time differently in individuals with a mild versus severe  
760 disease course. The latter was performed statistically by testing for an interaction effect  
761 between time and clinical course. For the purposes of this analysis, we binarised patients  
762 into severe or non-severe clinical course according to the peak WHO severity disease of  
763 their illness. Patients with a peak WHO score of mild or moderate were considered non-  
764 severe and those with a peak score of severe or critical were considered severe.

765

766 We then used R's `bs` function to fit a polynomial spline of degree 2 to model protein  
767 concentration with respect time (from symptom onset, measured in days) [57]. The spline  
768 was fit for samples that were taken between 1 and 21 days from symptom onset, inclusive.  
769 We estimated random slopes with respect to time, in addition to random intercepts, to  
770 account for each individual's unique disease course. For each protein, we fitted the following  
771 model (R notation):

772 
$$\text{NPX} \sim \text{time} * \text{severity} + \text{sex} + \text{age} + \text{ethnicity} + (\text{time} | \text{individual})$$

773 To identify proteins that changed significantly over time, we examined the P-values for the  
774 main effect of time. To identify proteins with distinct temporal profiles between severe and  
775 non-severe cases, we examined the P values for the time x severity interaction term. For  
776 each of these two research questions, P-values were adjusted for the multiple proteins  
777 tested using the Benjamini-Hochberg method and 5% FDR used as the significance  
778 threshold.

779

#### 780 **Data availability statement**

781 All data generated during this study are included in the manuscript and supporting files.  
782 Underlying source data for all analyses (individual-level proteomic and clinical phenotyping  
783 data) are available without restriction as **Source Data Files 1-4**. In addition, these data have  
784 been deposited in the Dryad Digital Repository (doi:10.5061/dryad.6t1g1jwxj).

785

786 **Code availability:** code is available in the following GitHub repository:

787 [https://github.com/jackgisby/longitudinal\\_olink\\_proteomics](https://github.com/jackgisby/longitudinal_olink_proteomics)

788

#### 789 **Author contributions:**

790 Conceived and designed the study: MCP, MB, MW, DCT, JEP.

791 Funding acquisition: JB, MCP, MB, MW, DCT, JEP.

792 Patient recruitment and sample collection: CLC, NM-T, ES, SPM, MFP, MW, DCT.

793 Led and coordinated patient recruitment: MW.

794 Sample processing: THM, PMM, NBB, SL, MP, FT, EF, M-A M, ED, LT, MB.

795 Clinical phenotyping: CLC, NM-T, SL, ES, MFP, MCP, JEP.

796 Data analysis: JG, AP.

797 Supervised the analysis: JEP.

798 Statistical support: PK, ACR.

799 Wrote the paper: JG, JEP

800 Results interpretation and editing the paper: MB, MCP, DT, ACR, JB.  
801 All authors critically reviewed and approved the manuscript before submission.

802

### 803 **Acknowledgements**

804 The authors thank the patients who volunteered for this study and the staff at Imperial  
805 College Healthcare NHS Trust (the Imperial College Healthcare NHS Trust renal COVID-19  
806 group and dialysis staff):

807

808 Appelbe M, Ashby DR, Brown EA, Cairns T, Charif R, Condon M, Corbett RW, Duncan N,  
809 Edwards C, Frankel A, Griffith M, Harris S, Hill P, Kousios A, Levy JB, Loucaidou M,  
810 Lightstone L, Liu L, Lucisano G, Lynch K, Mclean A, Moabi D, Muthusamy A, Nevin M,  
811 Palmer A, Parsons D, Prout V, Salisbury E, Smith C, Tam F, Tanna A, Tansey K, Tomlinson  
812 J, Webster P.

813

814 We also acknowledge the efforts of renal specialist doctors in training for assistance with  
815 recruiting patients to this study.

816

817 We also thank:

818 - Hari and Rachna Murgai and Milan and Rishi Khosla for generous support with sample  
819 transport.

820 - Dr Kerry Rostron for exceptional support with laboratory facilities in challenging  
821 circumstances and the Department administrators for their help.

822 - Dr Brian Tom and Dr Jessica Barrett (MRC Biostatistics Unit, University of Cambridge) for  
823 statistical advice.

824 - Prof Sir John Savill (Melbourne Academic Centre for Health) for comments on the  
825 manuscript.

826

### 827 **Funding statement**

828 This research was partly funded by Community Jameel and the Imperial President's  
829 Excellence Fund and by a UKRI-DHSC COVID-19 Rapid Response Rolling Call  
830 (MR/V027638/1) (to JEP). We also acknowledge a contribution from UKRI/NIHR through the  
831 UK Coronavirus Immunology Consortium (UK-CIC) and the National Institute for Health  
832 Research (NIHR) Biomedical Research Centre based at Imperial College Healthcare NHS  
833 Trust and Imperial College London. The views expressed are those of the author(s) and not  
834 necessarily those of the NHS, the NIHR or the Department of Health. JEP is supported by  
835 UKRI Innovation Fellowship at Health Data Research UK (MR/S004068/2). DCT is  
836 supported by a Stage 2 Wellcome-Beit Prize Clinical Research Career Development  
837 Fellowship (20661206617/A/17/Z and 206617/A/17/A) and the Sidharth Burman endowment.  
838 MCP is a Wellcome Trust Senior Fellow in Clinical Science (212252/Z/18/Z). NM-T and ES  
839 are supported by Wellcome Trust and Imperial College London Research Fellowships, and  
840 CLC by an Auchi Clinical Research Fellowship. PDWK is supported by the UK Medical  
841 Research Council (MC\_UU\_00002/13).

842

843 The funders had no role in study design, data collection and interpretation, or the decision to  
844 submit the work for publication.

845

### 846 **Competing interests:**

847 None of the authors have any patents (planned, pending or issued) relevant to this work. Dr.  
848 McAdoo reports personal fees from Celltrion, Rigel, GSK and Cello, unrelated to the  
849 submitted work. Dr Peters has received travel and accommodation expenses and hospitality

850 from Olink to speak at Olink-sponsored academic meetings. None of the other authors have  
851 any competing interests.  
852  
853



854 **Figure Legends**

855

856 **Figure 1 – Study design.**

857 **a)** Schematic representing a summary of the patient cohorts, sampling and the major  
858 analyses. Blue and red stick figures represent outpatients and hospitalised patients,  
859 respectively. **b)** Timing of serial blood sampling in relation to clinical course of COVID-19  
860 (subcohort A). Black asterisks indicate when samples were obtained. Three patients were  
861 already in hospital prior to COVID-19 diagnosis (indicated by red bars).

862

863 **Figure 1 figure supplement 1 – Baseline characteristics of subcohort A.**

864 The number of COVID-19 positive and negative patients in subcohort A (plasma), stratified  
865 by: **a)** sex, **b)** age, and **c)** ethnicity. **d)** Serial samples obtained for COVID-19 patients.

866

867 **Figure 2 – Principal components analysis.**

868 PC = principal component. Each point represents a sample. Colouring indicates COVID-19  
869 status. The directions and relative sizes of the 6 largest PC loadings are plotted as arrows  
870 (middle column).

871 **a-b)** Subcohort A. Due to serial sampling, there are multiple samples for most patients. The  
872 proportion of variance explained in subcohort A by each PC is shown in parentheses on the  
873 axis labels. **c-d)** Subcohort B. Samples are projected into the PCA coordinates from  
874 subcohort A.

875

876 **Figure 2 figure supplement 1 – Principal components analysis in relation to clinical  
877 severity.**

878 **a)** Colouring indicates WHO severity at time of sampling. **b)** Colouring indicates overall  
879 clinical course (indicated by peak WHO severity) for the patient from which that sample was  
880 taken.

881

882 **Figure 2 figure supplement 2 – Principal components analysis in relation to assay  
883 plate.**

884 Principal components analysis of the subcohort A coloured by plate.

885

886 **Figure 3 – Identification of dysregulated proteins.**

887 **a) Proteins up-regulated (red) or down-regulated (blue) in COVID-19 positive patients  
888 versus negative ESKD patients.** n= 256 plasma samples from 55 COVID-19 positive  
889 patients, versus n= 51 ESKD controls (1 sample per control patient).

890 **b) Proteins associated with disease severity.** Associations of protein levels against WHO  
891 severity score at the time of sampling. Linear gradient indicates the effect size. A positive  
892 effect size (red) indicates that an increase in protein level is associated with increasing  
893 disease severity and a negative gradient (blue) the opposite. n= 256 plasma samples from  
894 55 COVID-19 positive patients. For **a)** and **b)**: P-values from linear mixed models after  
895 Benjamini-Hochberg adjustment; significance threshold= 5% FDR; dark-grey = non-  
896 significant.

897 **c) Heatmap showing protein levels for selected proteins with strong associations with  
898 severity.** Each column represents a sample (n=256 COVID-19 samples and 51 non-infected  
899 samples). Each row represents a protein. Proteins are annotated using the symbol of their  
900 encoding gene. For the purposes of legibility, not all significantly associated proteins are  
901 shown; the heatmap is limited to the 17% most up- or down-regulated proteins (by effect  
902 size) of those with a significant association. Proteins are ordered by hierarchical clustering.  
903 Samples are ordered by WHO severity at the time of blood sample ('Severity'). 'Overall  
904 course' indicates the peak WHO severity over the course of the illness.

905

906 **Figure 3 figure supplement 1. Differential abundance analysis between ESKD patients  
907 with and without COVID-19.**

908 Heatmap showing selected proteins with the largest fold changes in differential abundance  
909 analysis (subcohort A). As for Figure 3, the heatmap is limited to the 17% most up- or down-  
910 regulated proteins (by fold change) of those with a significant association.

911

912 **Figure 3 figure supplement 2 – Permutation analysis to estimate the null distribution.**

913 Histogram showing the distribution of the number of associations declared significant (FDR  
914 5%) after random permutation of class labels (100,000 replications). **a)** the COVID-19 +ve  
915 versus -ve differential abundance analysis. **b)** the COVID-19 severity differential abundance  
916 analysis. The vertical red line denotes the number of proteins we found significant in the  
917 analysis with the true sample labels.

918

919 **Figure 3 figure supplement 3 – Sensitivity analyses adjusting for diabetes status and  
920 cause of ESKD.**

921 As sensitivity analyses, the COVID-19 positive versus negative differential abundance  
922 regressions were repeated adding diabetes status (a-b) and cause of ESKD (c-d) as  
923 additional covariates. The basic model included age, sex and ethnicity as covariates. Each  
924 point represents a protein. A comparison of  $-\log_{10}$  p-values and effect sizes are shown for  
925 all 436 proteins.  $r$  indicates Pearson's correlation coefficient.

926

927 **Figure 3 figure supplement 4 – Sensitivity analysis adjusting for time since last  
928 haemodialysis.**

929 Comparison of results obtained with and without adding time since last haemodialysis as an  
930 additional covariate to the regression models. **a-b)** COVID-19 positive versus negative  
931 differential expression analysis. **c-d)** Severity analysis. Each point represents a protein.  $r$   
932 indicates Pearson's correlation coefficient.

933

934 **Figure 4 – Validation.**

935 **a)** Overlap between the significant associations in the differential abundance analysis  
936 between ESKD patients with and without COVID-19 in subcohorts A and B. 5% FDR was  
937 used as the significance threshold in both analyses.

938 **b)** Comparison of estimated effect sizes for all 436 proteins in the differential abundance  
939 analyses (COVID-19 positive versus negative) in subcohort A and B. Each point represents  
940 a protein. Pearson's  $r$  is shown.

941 Differential abundance analyses were performed using linear mixed models. Subcohort A  
942 analysis (plasma samples): 256 samples from 55 COVID-19 patients versus 51 non-infected  
943 patient samples (single time-point). Subcohort B (serum samples): 52 samples from 55  
944 COVID-19 patients and 11 non-infected patient samples (single time-point).

945

946 **Figure 4 figure supplement 1– Comparison with the report of Filbin *et al.* [16]**

947 Comparison of  $\log_2$  fold change for COVID-19 positive versus negative ESKD patients in our  
948 study versus COVID-19 positive versus negative respiratory distress patients in the report by  
949 Filbin *et al.* [16]. Colours indicate whether a protein was significantly differentially abundant  
950 in each study. Pearson's  $r$  is shown.

951

952 **Figure 5 - Selected proteins strongly associated with COVID-19 severity.**

953 Violin plots showing distribution of plasma protein levels according to COVID-19 status at the  
954 time of blood draw. Boxplots indicate plasma median and interquartile range.  $n=256$  samples from  
955 55 COVID-19 patients and 51 samples from non-infected patients. WHO severity indicates  
956 the clinical severity score of the patient at the time the sample was taken. Mild  $n=135$   
957 samples; moderate  $n=77$  samples; severe  $n=29$  samples; critical  $n=15$  samples. Upper  
958 panel: monocyte chemokines. Middle panel: markers of epithelial injury. Lower panel: 2  
959 neutrophil proteases, and IL6.

960

961 **Figure 6 – comparison of proteins differentially expressed in COVID-19 with those  
962 associated with clinical severity.**

963 a) Overlap between the proteins significantly differentially expressed in COVID-19 (n=256  
964 COVID-19 samples and 51 non-infected samples) versus those associated with severity  
965 (within cases analysis, n=256 samples) (subcohort A). 5% FDR was used as the significant  
966 cut-off in both analyses.

967 b) Comparison of effect sizes for each protein in the COVID-19 positive versus negative  
968 analysis (x-axis) and severity analysis (y-axis). Each point represents a protein. Pearson's r  
969 is shown.

970 c) Examples of proteins specifically associated with severity but not significantly differentially  
971 abundant in the comparison of all cases versus controls. Violin plots showing distribution of  
972 plasma protein levels according to COVID-19 status at the time of blood draw. Boxplots  
973 indicate median and interquartile range. n=256 samples from 55 COVID-19 patients and 51  
974 samples from non-infected patients. WHO severity indicates the clinical severity score of the  
975 patient at the time the sample was taken. Mild n=135 samples; moderate n=77 samples;  
976 severe n=29 samples; critical n= 15 samples.

977

#### 978 **Figure 7 – Prediction of severe COVID-19 and death.**

979 a) The 12 most important proteins for predicting overall clinical course (defined by peak  
980 COVID-19 WHO severity) using Random Forests supervised learning. If a variable is  
981 important for prediction, it is likely to appear in many decision trees (number of trees) and be  
982 close to the root node (i.e. have a low minimal depth). The mean minimal depth across all  
983 trees (white box) was used as the primary feature selection metric.

984 b) Proteins that are significant predictors of death (Benjamini-Hochberg adjusted p <0.05).  
985 n=256 samples from 55 COVID-19 positive patients, of whom 9 died. Risk coefficient  
986 estimates are from a joint model. Bars indicate 95% confidence intervals. For proteins with a  
987 positive risk coefficient, a higher concentration corresponds to a high risk of death, and vice  
988 versa for proteins with negative coefficients.

989

#### 990 **Figure 7 figure supplement 1 – proteins associated with risk of death: correlation to 991 clinical severity and clinical laboratory measurements.**

992 Proteins significantly associated with risk of death (5% FDR) are shown. The estimated  
993 effect size from the linear mixed model testing association with severity are also shown.  
994 Correlations between protein levels and contemporaneous clinical laboratory marker values  
995 were calculated using rcorr [55] for each of the proteins significant (5% FDR) in the joint  
996 model. The rows and columns of the clinical marker correlation matrix are ordered by  
997 hierarchical clustering.

998

#### 999 **Figure 8 – Associations of clinical laboratory markers with plasma proteins.**

1000 Proteins that are positively (red) or negatively (blue) associated with clinical laboratory  
1001 parameters (5% FDR). P-values from differential abundance analysis using linear mixed  
1002 models after Benjamini-Hochberg adjustment. Dark-grey = non-significant. Two associations  
1003 were found for d-dimer (not shown- see **Supplementary File 1g**).

1004

#### 1005 **Figure 9 – Modelling of temporal protein trajectories.**

1006 The top 18 proteins displaying the most significantly (5% FDR) different longitudinal  
1007 trajectories between patients with a mild or moderate (n= 28) versus severe or critical (n=  
1008 27) overall clinical course (defined by peak WHO severity). Means and 95% confidence  
1009 intervals for each group, predicted using linear mixed models (**Methods**), are plotted. The  
1010 remainder of significant proteins are shown in **Figure 9 figure supplement 1**. Individual  
1011 data points are shown in **Figure 9 figure supplement 2**.

1012

1013 **Figure 9 figure supplement 1– display of modelled temporal trajectories for other  
1014 proteins with a significant time x severity interaction.** Proteins significant at 5% FDR but  
1015 not shown in Figure 9 are displayed here.

1016

1017 **Figure 9 figure supplement 2– raw data points for modelling of temporal protein**  
1018 **trajectories.** The 8 most significant proteins from Figure 9 are displayed.  
1019  
1020  
1021  
1022

1023

|                                         | COVID-19 positive ESKD patients (n=55) |                                                     |                                                      | ESKD controls (n=51) |
|-----------------------------------------|----------------------------------------|-----------------------------------------------------|------------------------------------------------------|----------------------|
|                                         | Overall                                | Patients with peak severity mild or moderate (n=28) | Patient with peak severity severe or critical (n=27) |                      |
| <b>Age</b>                              |                                        |                                                     |                                                      |                      |
| Median (Q1-Q3)                          | 72.2<br>62.5-77.3                      | 73.4<br>65.5-76.4                                   | 68.5<br>61.8-78.8                                    | 70.1<br>62.2-75.1    |
| <b>Sex</b>                              |                                        |                                                     |                                                      |                      |
| M                                       | 39 (70.9%)                             | 18 (64.3%)                                          | 21 (77.8%)                                           | 36 (70.6%)           |
| F                                       | 16 (29.1%)                             | 10 (35.7%)                                          | 6 (22.2%)                                            | 15 (29.4%)           |
| <b>Ethnicity</b>                        |                                        |                                                     |                                                      |                      |
| White                                   | 16 (29.1%)                             | 5 (17.9%)                                           | 11 (40.7%)                                           | 13 (25.5%)           |
| Black                                   | 8 (14.5%)                              | 5 (17.9%)                                           | 3 (11.1%)                                            | 8 (15.7%)            |
| South Asian                             | 18 (32.7%)                             | 10 (35.7%)                                          | 8 (29.6%)                                            | 20 (39.2%)           |
| Asian (other)                           | 4 (7.3%)                               | 1 (3.6%)                                            | 3 (11.1%)                                            | 3 (5.9%)             |
| Other                                   | 9 (16.4%)                              | 7 (25.0%)                                           | 2 (7.4%)                                             | 7 (13.7%)            |
| <b>Diabetes</b>                         | 34 (61.8%) *                           | 16 (57.1%)                                          | 18 (66.7%)                                           | 24 (47.1%) *         |
| <b>Current Smoker</b>                   | 1 (1.8%)                               | 1 (3.6%)                                            | 0                                                    | 0                    |
| <b>ESKD Cause</b>                       |                                        |                                                     |                                                      |                      |
| DN                                      | 29 (52.7%)                             | 14 (50.0%)                                          | 15 (55.6%)                                           | 20 (39.2%)           |
| Genetic                                 | 1 (1.8%)                               | 1 (3.6%)                                            | 0                                                    | 1 (2.0%)             |
| GN                                      | 3 (5.5%)                               | 1 (3.6%)                                            | 2 (7.4%)                                             | 9 (17.6%)            |
| HTN/Vascular                            | 5 (9.1%)                               | 3 (5.5%)                                            | 2 (7.4%)                                             | 7 (13.7%)            |
| Other                                   | 8 (14.5%)                              | 5 (17.9%)                                           | 3 (11.1%)                                            | 4 (7.8%)             |
| Unknown                                 | 9 (16.4%)                              | 4 (14.3%)                                           | 5 (18.5%)                                            | 10 (19.6%)           |
| <b>Hospitalisation due to COVID-19†</b> | 33 (60%)                               | 6 (21.4%)                                           | 27 (100%)                                            | N/A                  |
| <b>Fatal COVID-19</b>                   | 9 (16.3%)                              | 0 (0%)                                              | 9 (33.3%)                                            | N/A                  |

1024

1025

**Table 1 – Characteristics of subcohort A.**

1026

GN = Glomerulonephritis. HTN = Hypertension. IQR = inter-quartile range. 'South Asian' represents individuals with Indian, Pakistani or Bangladeshi ancestry. Subsets defined according to peak WHO severity over the course of the illness. N/A = not applicable.

1027

1028

1029

\*One patient had type 1 diabetes, the remainder type 2.

1030

1031

|                                            | <b>COVID-19 positive<br/>ESKD patients<br/>(n=46)</b> | <b>COVID-19 negative<br/>ESKD controls<br/>(n=11)*</b> |
|--------------------------------------------|-------------------------------------------------------|--------------------------------------------------------|
| <b>Age</b>                                 |                                                       |                                                        |
| Median<br>(Q1-Q3)                          | 64.3<br>60.3-73.0                                     | 71.6<br>(61.7-73.9)                                    |
| <b>Sex</b>                                 |                                                       |                                                        |
| M                                          | 32 (69.6%)                                            | 8 (72.3%)                                              |
| F                                          | 14 (30.4%)                                            | 3 (27.3%)                                              |
| <b>Ethnicity</b>                           |                                                       |                                                        |
| White                                      | 11 (23.9%)                                            | 3 (27.3%)                                              |
| Black                                      | 8 (17.4%)                                             | 3 (27.3%)                                              |
| South Asian                                | 12 (26.1%)                                            | 3 (27.3%)                                              |
| Asian (other)                              | 7 (15.2%)                                             | 0                                                      |
| Other                                      | 8 (17.4%)                                             | 2 (18.2%)                                              |
| <b>Diabetes</b>                            | 29 (63.0%)                                            | 6 (54.5%)                                              |
| <b>Current Smoker</b>                      | 2 (4.3%)                                              | 0 (%)                                                  |
| <b>ESKD Cause</b>                          |                                                       |                                                        |
| DN                                         | 19 (41.3%)                                            | 5 (45.5%)                                              |
| Genetic                                    | 1 (2.2%)                                              | 0                                                      |
| GN                                         | 7 (15.2%)                                             | 1 (9.1%)                                               |
| HTN/Vascular                               | 3 (6.5%)                                              | 1 (9.1%)                                               |
| Other                                      | 3 (6.5%)                                              | 2 (18.2%)                                              |
| Unknown                                    | 13 (28.3%)                                            | 2 (18.2%)                                              |
| <b>Hospitalisation due to<br/>COVID-19</b> | 41 (89.1%)                                            | N/A                                                    |
| <b>Severe or critical COVID-19</b>         | 33 (71.7%)                                            | N/A                                                    |
| <b>Fatal COVID-19</b>                      | 9 (19.6%)                                             | N/A                                                    |

1032

1033

**Table 2 – Characteristics of subcohort B.**

1034

GN = Glomerulonephritis. HTN = Hypertension. IQR = inter-quartile range. ‘South Asian’ represents individuals with Indian, Pakistani or Bangladeshi ancestry. Subsets defined according to peak WHO severity over the course of the illness. N/A = not applicable. \*These 11 controls are a subset of the control patients used in subcohort A.

1035

1036

1037

1038

1039

1040 **Supplementary File 1 table legends.**

1041

1042 **Supplementary File 1a. Protein Annotation.**

1043 List of the 436 proteins measured. GeneID = gene symbol of the gene encoding the protein (used as  
1044 the main identifier in the manuscript); UniProt = UniProt ID; Olink Assay Name = protein id used by  
1045 Olink; Protein Name = full protein name; Panel name = the name of the 92 protein multiplex Olink  
1046 panel on which the protein was measured.

1047

1048 **Supplementary File 1b. Enrichment of Reactome terms for the entire set of proteins measured.**

1049 The results of enrichment testing for genes corresponding to all 436 measured proteins against the  
1050 background of the genome. The analysis was performed against the Reactome pathways using  
1051 string-db. The list of Reactome terms is ordered by the number of proteins associated with the term.

1052

1053 **Supplementary File 1c. Differential abundance analysis for COVID-19 positive vs negative  
1054 ESKD patients in subcohort A and B.**

1055 Summary statistics for all 436 proteins are shown. Pvalue = nominal p-value from linear mixed model.  
1056 Adjusted Pvalue = p-values after Benjamini-Hochberg correction. Fold change = estimated fold  
1057 change from regression coefficient. Proteins are ordered based on results in subcohort A: first by  
1058 whether they are significant or not (at 5% FDR), then by fold change (from positive to negative). Note  
1059 the associations are not ordered by p-value so strong associations do not necessarily appear at the  
1060 top of the table. Significant adjusted p-values are coloured in green and non-significant in grey.  
1061 Estimated fold changes are coloured in a gradient from red to blue for up or downregulated in COVID-  
1062 19 +ve versus -ve, respectively.

1063 Sample size for subcohort A: n= 256 plasma samples from 55 COVID-19 positive ESKD patients,  
1064 versus n= 51 ESKD controls (1 sample per control patient).

1065 Sample size for subcohort B: 52 samples from 55 COVID-19 patients and 11 non-infected patient  
1066 samples (single time-point).

1067

1068 **Supplementary File 1d Associations of proteins and COVID-19 severity (subcohort A).**

1069 Summary statistics for all 436 proteins are shown. Pvalue = nominal p-value from linear mixed model.  
1070 Adjusted Pvalue = p-values after Benjamini-Hochberg correction. Fold change = estimated fold  
1071 change from regression coefficient. Proteins are ordered first by whether they are significant or not (at  
1072 5% FDR), then by linear gradient (effect size) from positive to negative. Note the associations are not  
1073 ordered by p-value so strong associations do not necessarily appear at the top of the table.

1074

1075 **Supplementary File 1e. Predictors of clinical course from Random Forests.**

1076 Importance metrics for each protein for prediction according to a random forest model trained to  
1077 predict current or future severe/critical disease using the first sample of each patient. Proteins are  
1078 ordered by mean minimal depth across all trees – this was used as the primary importance metric.

1079

1080 **Supplementary File 1f. Proteomic predictors of fatal COVID-19.**

1081 Summary statistics from joint models for fatal disease. Results for all 436 proteins are shown. “Is  
1082 significant” indicates significance (green) or not (grey) at 5% FDR. The association coefficient for  
1083 each protein indicates the direction and magnitude of the estimated log relative risk for death (red  
1084 indicates higher protein levels increase risk of death, blue the opposite). 95% confidence intervals are  
1085 plotted.

1086

1087 **Supplementary File 1g. Associations of proteins and clinical laboratory measurements.**

1088 Clinical variable = clinical lab tests: white cell count, lymphocyte count, neutrophil count, monocyte  
1089 count, C-reactive protein, ferritin, d-dimer, troponin.

1090

1091 **Supplementary File 1h. Longitudinal proteomic profiling with linear mixed models.**

1092 Summary statistics from the linear mixed models used to identify proteins with differential temporal  
1093 trajectories between mild/moderate (n=28) and severe/critical COVID-19 patients (n=27). Summary  
1094 statistics for all 436 proteins are shown.

1095

1096 Pvalue = nominal p-value from linear mixed model for the interaction term between time from  
1097 symptom onset (days) and overall WHO severity (as a binary variable: mild-moderate or severe-  
1098 critical).

1099  
1100 Adjusted Pvalue = p-values after Benjamini-Hochberg correction. "Is significant" indicates significance  
1101 (green) or not (grey) at 5% FDR.

1102  
1103 **Supplementary File 1i. Comparison to other proteomic studies of COVID-19 positive vs**  
1104 **negative patients.**

1105 Proteins that were differentially abundant in COVID-19 +ve vs -ve patients in our data are listed (5%  
1106 FDR). TRUE indicates that the protein was reported as differentially abundant in the relevant previous  
1107 proteomic study. The final column summarises whether the association was previously reported in  
1108 any of the 4 studies. We have not harmonised significance thresholds between studies: we simply  
1109 report whether the authors declared the protein significant by the threshold of their study.

1110  
1111 **Supplementary File 1j. Comparison to other proteomic studies of COVID-19 severity.**  
1112 Proteins that were associated with severity in our data are listed (5% FDR). TRUE indicates that the  
1113 protein was reported as associated with severity in the relevant previous proteomic study. The final  
1114 column summarises whether the association was previously reported in any 1 or more of the 4  
1115 studies. We have not harmonised significance thresholds between studies: we simply report whether  
1116 the authors declared the protein significant by the threshold of their study.

1117  
1118 Results are shown for all 436 proteins against all 8 lab measurements.

1119  
1120 Adjusted p-value = p-value from linear mixed model after Benjamini-Hochberg correction.

1121  
1122 Gradient indicates effect size and direction. A positive gradient (red) indicates higher concentrations  
1123 of proteins are associated with higher clinical laboratory measurements. "Is significant" indicates  
1124 significance (green) or not (grey) at 5% FDR.

1125  
1126 Contemporaneous clinical laboratory tests were not available for all plasma samples. The proportion  
1127 of samples for which contemporaneous lab tests were available were: white cell count 66%,  
1128 neutrophils 66%, monocytes 66%, lymphocytes 66%, CRP 64%, ferritin 36%, troponin 35%, d-dimer  
1129 30%.

1130  
1131 **Supplementary File 1k. Per protein correlations between plasma and serum levels derived**  
1132 **from the same blood sample in 11 COVID-19 negative ESKD patients.**

1133 Plasma and serum were taken from 11 non-infected ESKD patients that were measured in both  
1134 subcohort A (plasma) and B (serum). Pearson's r was calculated for the 11 paired measurements for  
1135 each protein. Proteins are ordered by r value; this column is coloured from red to blue for positive and  
1136 negative r values, respectively. 95% confidence intervals are reported. We also report the variance of  
1137 the NPX levels for each protein in plasma and in serum.

1138  
1139



## 1140 References

- 1141 1. Horby, P. *et al.* Dexamethasone in Hospitalized Patients with Covid-19 — Preliminary  
1142 Report. *N. Engl. J. Med.* **0**, NEJMoa2021436 (2020) doi:10.1056/NEJMoa2021436.
- 1143 2. Gordon, A. C. *et al.* Interleukin-6 Receptor Antagonists in Critically Ill Patients with  
1144 Covid-19 - Preliminary report. *medRxiv* (2021) doi:10.1101/2021.01.07.21249390.
- 1145 3. Suhre, K., McCarthy, M. I. & Schwenk, J. M. Genetics meets proteomics: perspectives  
1146 for large population-based studies. *Nat. Rev. Genet.* (2020) doi:10.1038/s41576-020-  
1147 0268-2.
- 1148 4. Williamson, E. J. *et al.* Factors associated with COVID-19-related death using  
1149 OpenSAFELY. *Nature* **584**, 430–436 (2020) doi:10.1038/s41586-020-2521-4.
- 1150 5. Docherty, A. B. *et al.* Features of 16,749 hospitalised UK patients with COVID-19  
1151 using the ISARIC WHO Clinical Characterisation Protocol. *medRxiv*  
1152 2020.04.23.20076042 (2020) doi:10.1101/2020.04.23.20076042.
- 1153 6. Corbett, R. W. *et al.* Epidemiology of COVID-19 in an Urban Dialysis Center. *J. Am.*  
1154 *Soc. Nephrol.* **31**, 1815–1823 (2020) doi:10.1681/ASN.2020040534.
- 1155 7. Ng, J. H. *et al.* Outcomes of patients with end-stage kidney disease hospitalized with  
1156 COVID-19. *Kidney Int.* (2020) doi:10.1016/j.kint.2020.07.030.
- 1157 8. Valeri, A. M. *et al.* Presentation and outcomes of patients with ESKD and COVID-19.  
1158 *J. Am. Soc. Nephrol.* **31**, 1409–1415 (2020) doi:10.1681/ASN.2020040470.
- 1159 9. Hastie T, Tibshirani R, F. J. High-Dimensional Problems:  $p \gg N$ . in *The Elements of*  
1160 *Statistical Learning* 649–698 (Springer Series in Statistics, 2001).
- 1161 10. Ibrahim, J. G., Chu, H. & Chen, L. M. Basic concepts and methods for joint models of  
1162 longitudinal and survival data. *J. Clin. Oncol. Off. J. Am. Soc. Clin. Oncol.* **28**, 2796–  
1163 2801 (2010) doi:10.1200/JCO.2009.25.0654.
- 1164 11. Rizopoulos, D. JM: An R package for the joint modelling of longitudinal and time-to-  
1165 event data. *J. Stat. Softw.* **35**, 1–33 (2010) doi:10.18637/jss.v035.i09.
- 1166 12. Guan, W. *et al.* Clinical characteristics of coronavirus disease 2019 in China. *N. Engl.*  
1167 *J. Med.* **382**, 1708–1720 (2020) doi:10.1056/NEJMoa2002032.
- 1168 13. Shen, B. *et al.* Proteomic and Metabolomic Characterization of COVID-19 Patient  
1169 Sera. *Cell* **182**, 59-72.e15 (2020) doi:10.1016/j.cell.2020.05.032.
- 1170 14. Lucas, C. *et al.* Longitudinal analyses reveal immunological misfiring in severe  
1171 COVID-19. *Nature* **584**, 463–469 (2020) doi:10.1038/s41586-020-2588-y.
- 1172 15. Arunachalam, P. S. *et al.* Systems biological assessment of immunity to mild versus  
1173 severe COVID-19 infection in humans. *Science (80-. ).* **6261**, 1–18 (2020)  
1174 doi:10.1126/science.abc6261.
- 1175 16. Filbin, M. R. *et al.* Plasma proteomics reveals tissue-specific cell death and mediators  
1176 of cell-cell interactions in severe COVID-19 patients. *bioRxiv* 2020.11.02.365536  
1177 (2020) doi:10.1101/2020.11.02.365536.
- 1178 17. COVID-19 Data. *The Renal Association* <https://renal.org/health-professionals/covid-19/covid-19-data> (2020).  
1179
- 1180 18. Scottish Renal Registry COVID-19 report. *Public Health Scotland*  
1181 <https://beta.isdscotland.org/find-publications-and-data/population-health/covid-19/scottish-renal-registry-covid-19-report/> (2020).  
1182

- 1183 19. Eiselt, J. *et al.* Previous Vaccination and Age are More Important Predictors of  
1184 Immune Response to Influenza Vaccine than Inflammation and Iron Status in Dialysis  
1185 Patients. *Kidney Blood Press. Res.* **41**, 139–147 (2016) doi:10.1159/000443416.
- 1186 20. Girndt, M., Sester, U., Sester, M., Kaul, H. & Köhler, H. Impaired cellular immune  
1187 function in patients with end-stage renal failure. *Nephrology, dialysis,*  
1188 *transplantation*: official publication of the European Dialysis and Transplant  
1189 Association - European Renal Association vol. 14 2807–2810 (1999)  
1190 doi:10.1093/ndt/14.12.2807.
- 1191 21. Sarnak, M. J. & Jaber, B. L. Mortality caused by sepsis in patients with end-stage  
1192 renal disease compared with the general population. *Kidney Int.* **58**, 1758–1764  
1193 (2000) doi:10.1111/j.1523-1755.2000.00337.x.
- 1194 22. Alexiewicz, J. M., Smogorzewski, M., Fadda, G. Z. & Massry, S. G. Impaired  
1195 phagocytosis in dialysis patients: studies on mechanisms. *Am. J. Nephrol.* **11**, 102–  
1196 111 (1991) doi:10.1159/000168284.
- 1197 23. Massry, S. & Smogorzewski, M. Dysfunction of polymorphonuclear leukocytes in  
1198 uremia: role of parathyroid hormone. *Kidney Int. Suppl.* **78**, S195-6 (2001)  
1199 doi:10.1046/j.1523-1755.2001.59780195.x.
- 1200 24. Girndt, M., Sester, M., Sester, U., Kaul, H. & Köhler, H. Molecular aspects of T- and  
1201 B-cell function in uremia. *Kidney Int. Suppl.* **78**, S206-11 (2001) doi:10.1046/j.1523-  
1202 1755.2001.59780206.x.
- 1203 25. Meier, P., Dayer, E., Blanc, E. & Wauters, J.-P. Early T cell activation correlates with  
1204 expression of apoptosis markers in patients with end-stage renal disease. *J. Am.*  
1205 *Soc. Nephrol.* **13**, 204–212 (2002).
- 1206 26. Betjes, M. G. H. Immune cell dysfunction and inflammation in end-stage renal  
1207 disease. *Nat. Rev. Nephrol.* **9**, 255–265 (2013) doi:10.1038/nrneph.2013.44.
- 1208 27. Boattini, M. *et al.* Influenza and respiratory syncytial virus infections in the oldest-old  
1209 continent. *Eur. J. Clin. Microbiol. Infect. Dis. Off. Publ. Eur. Soc. Clin. Microbiol.* **39**,  
1210 2085–2090 (2020) doi:10.1007/s10096-020-03959-9.
- 1211 28. Prasad, N. *et al.* Respiratory Syncytial Virus–Associated Hospitalizations Among  
1212 Adults With Chronic Medical Conditions. *Clin. Infect. Dis.* (2020)  
1213 doi:10.1093/cid/ciaa730.
- 1214 29. Usvyat, L. A. *et al.* Seasonal variations in mortality, clinical, and laboratory parameters  
1215 in hemodialysis patients: a 5-year cohort study. *Clin. J. Am. Soc. Nephrol.* **7**, 108–  
1216 115 (2012) doi:10.2215/CJN.03880411.
- 1217 30. Carrero, J. J. & Stenvinkel, P. Inflammation in end-stage renal disease--what have we  
1218 learned in 10 years? *Semin. Dial.* **23**, 498–509 (2010) doi:10.1111/j.1525-  
1219 139X.2010.00784.x.
- 1220 31. Naseeb, U. *et al.* Complementary LC-MS/MS Proteomic Analysis of Uremic Plasma  
1221 Proteins. *J. Coll. Physicians Surg. Pak.* **25**, 606–609 (2015).
- 1222 32. Christensson, A. *et al.* The Impact of the Glomerular Filtration Rate on the Human  
1223 Plasma Proteome. *Proteomics. Clin. Appl.* **12**, e1700067 (2018)  
1224 doi:10.1002/prca.201700067.
- 1225 33. Lind, L. *et al.* Longitudinal effects of aging on plasma proteins levels in older adults -  
1226 associations with kidney function and hemoglobin levels. *PLoS One* **14**, e0212060  
1227 (2019) doi:10.1371/journal.pone.0212060.

- 1228 34. Wu, C. *et al.* Risk Factors Associated With Acute Respiratory Distress Syndrome and  
1229 Death in Patients With Coronavirus Disease 2019 Pneumonia in Wuhan, China.  
1230 *JAMA Intern. Med.* **180**, 934–943 (2020) doi:10.1001/jamainternmed.2020.0994.
- 1231 35. Li, X. *et al.* Risk factors for severity and mortality in adult COVID-19 inpatients in  
1232 Wuhan. *J. Allergy Clin. Immunol.* **146**, 110–118 (2020) doi:10.1016/j.jaci.2020.04.006.
- 1233 36. Furlow, B. COVACTA trial raises questions about tocilizumab's benefit in COVID-19.  
1234 *Lancet Rheumatol.* **2**, e592 (2020) doi:10.1016/S2665-9913(20)30313-1.
- 1235 37. Gupta, R. K. *et al.* Development and validation of the ISARIC 4C Deterioration model  
1236 for adults hospitalised with COVID-19: a prospective cohort study. *Lancet. Respir.*  
1237 *Med.* (2021) doi:10.1016/S2213-2600(20)30559-2.
- 1238 38. Schutyser, E., Struyf, S. & Van Damme, J. The CC chemokine CCL20 and its  
1239 receptor CCR6. *Cytokine Growth Factor Rev.* **14**, 409–426 (2003) doi:10.1016/s1359-  
1240 6101(03)00049-2.
- 1241 39. Saha, S. K. *et al.* KRT19 directly interacts with  $\beta$ -catenin/RAC1 complex to regulate  
1242 NUMB-dependent NOTCH signaling pathway and breast cancer properties.  
1243 *Oncogene* **36**, 332–349 (2017) doi:10.1038/onc.2016.221.
- 1244 40. Maecker, H. *et al.* TWEAK attenuates the transition from innate to adaptive immunity.  
1245 *Cell* **123**, 931–944 (2005) doi:10.1016/j.cell.2005.09.022.
- 1246 41. Burkly, L. C., Michaelson, J. S., Hahm, K., Jakubowski, A. & Zheng, T. S. TWEAKing  
1247 tissue remodeling by a multifunctional cytokine: role of TWEAK/Fn14 pathway in  
1248 health and disease. *Cytokine* **40**, 1–16 (2007) doi:10.1016/j.cyto.2007.09.007.
- 1249 42. Henning, R. J., Bourgeois, M. & Harbison, R. D. Poly(ADP-ribose) Polymerase  
1250 (PARP) and PARP Inhibitors: Mechanisms of Action and Role in Cardiovascular  
1251 Disorders. *Cardiovasc. Toxicol.* **18**, 493–506 (2018) doi:10.1007/s12012-018-9462-2.
- 1252 43. Rouleau, M., Patel, A., Hendzel, M. J., Kaufmann, S. H. & Poirier, G. G. PARP  
1253 inhibition: PARP1 and beyond. *Nat. Rev. Cancer* **10**, 293–301 (2010)  
1254 doi:10.1038/nrc2812.
- 1255 44. Corren, J. New Targeted Therapies for Uncontrolled Asthma. *J. allergy Clin. Immunol.*  
1256 *Pract.* **7**, 1394–1403 (2019) doi:10.1016/j.jaip.2019.03.022.
- 1257 45. Galijasevic, S. The development of myeloperoxidase inhibitors. *Bioorg. Med. Chem.*  
1258 *Lett.* **29**, 1–7 (2019) doi:10.1016/j.bmcl.2018.11.031.
- 1259 46. Vergunst, C. E. *et al.* Modulation of CCR2 in rheumatoid arthritis: a double-blind,  
1260 randomized, placebo-controlled clinical trial. *Arthritis Rheum.* **58**, 1931–1939 (2008)  
1261 doi:10.1002/art.23591.
- 1262 47. Haringman, J. J. *et al.* A randomized controlled trial with an anti-CCL2 (anti-monocyte  
1263 chemotactic protein 1) monoclonal antibody in patients with rheumatoid arthritis.  
1264 *Arthritis Rheum.* **54**, 2387–2392 (2006) doi:10.1002/art.21975.
- 1265 48. Rodriguez, L. *et al.* Systems-Level Immunomonitoring from Acute to Recovery Phase  
1266 of Severe COVID-19. *Cell reports. Med.* **1**, 100078 (2020)  
1267 doi:10.1016/j.xcrm.2020.100078.
- 1268 49. Uhlen, M. *et al.* Tissue-based map of the human proteome. *Science (80-. ).* **347**,  
1269 1260419–1260419 (2015) doi:10.1126/science.1260419.
- 1270 50. Szklarczyk, D. *et al.* STRING v11: Protein-protein association networks with increased  
1271 coverage, supporting functional discovery in genome-wide experimental datasets.  
1272 *Nucleic Acids Res.* **47**, D607–D613 (2019) doi:10.1093/nar/gky1131.

- 1273 51. Gandolfo, L. C. & Speed, T. P. RLE plots: Visualizing unwanted variation in high  
1274 dimensional data. *PLoS One* **13**, 1–9 (2018) doi:10.1371/journal.pone.0191629.
- 1275 52. Kuhn, M. Building predictive models in R using the caret package. *J. Stat. Softw.* **28**,  
1276 1–26 (2008) doi:10.18637/jss.v028.i05.
- 1277 53. Bates, D., Mächler, M., Bolker, B. & Walker, S. Fitting Linear Mixed-Effects Models  
1278 Using lme4. *J. Stat. Softw.* **67**, (2015) doi:10.18637/jss.v067.i01.
- 1279 54. Kuznetsova, A., Brockhoff, P. B. & Christensen, R. H. B. lmerTest Package: Tests in  
1280 Linear Mixed Effects Models. *J. Stat. Softw.* **82**, (2017) doi:10.18637/jss.v082.i13.
- 1281 55. Bakdash, J. Z. & Marusich, L. R. Repeated measures correlation. *Front. Psychol.* **8**,  
1282 1–13 (2017) doi:10.3389/fpsyg.2017.00456.
- 1283 56. Leo, B. Random forests. *Mach. Learn.* **45**, 5–32 (2001)  
1284 doi:10.1023/A:1010933404324.
- 1285 57. Perperoglou, A., Sauerbrei, W., Abrahamowicz, M. & Schmid, M. A review of spline  
1286 function procedures in R. *BMC Med. Res. Methodol.* **19**, 1–16 (2019)  
1287 doi:10.1186/s12874-019-0666-3.
- 1288

# Figure 1

medRxiv preprint doi: <https://doi.org/10.1101/2020.11.05.20223289>; this version posted February 15, 2021. The copyright holder for this preprint (which was not certified by peer review) is the author/funder, who has granted medRxiv a license to display the preprint in perpetuity. It is made available under a [CC-BY-ND 4.0 International license](https://creativecommons.org/licenses/by-nd/4.0/).

a

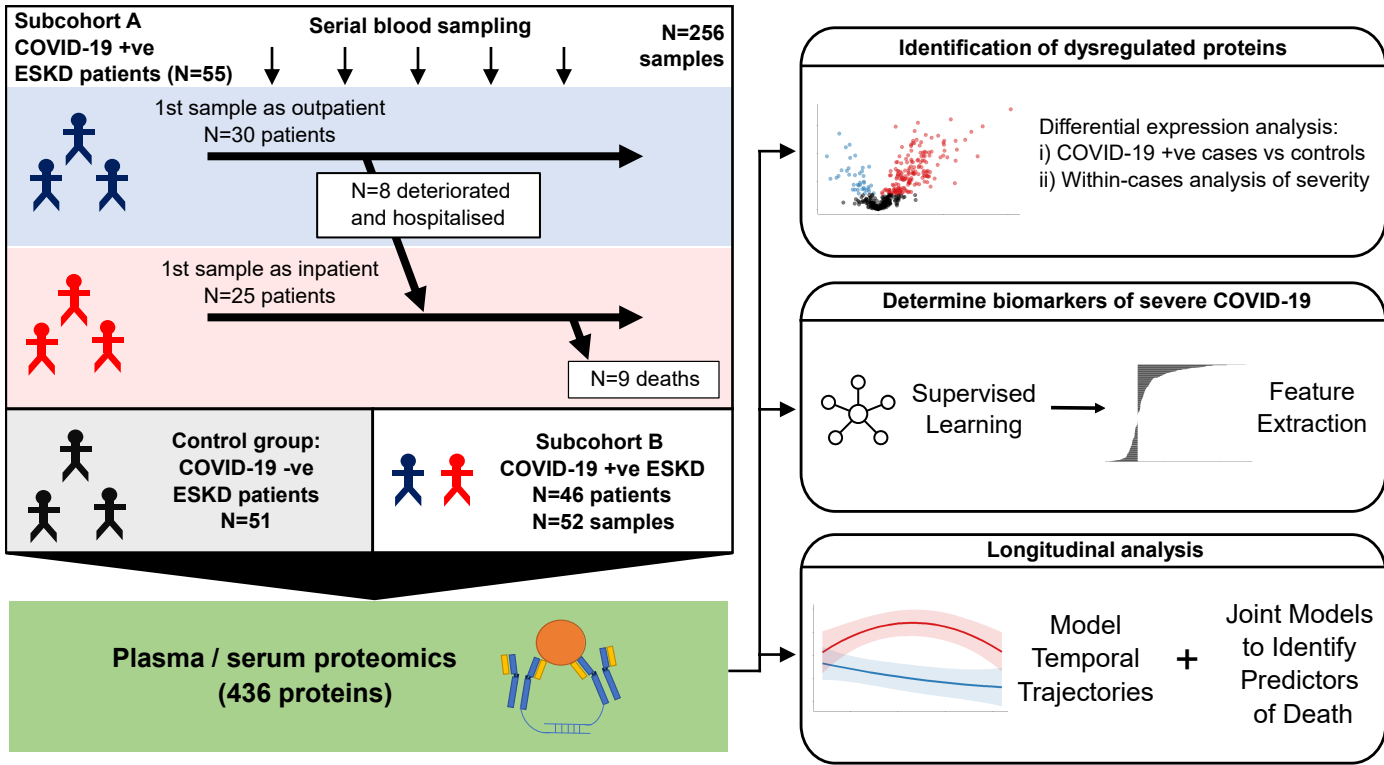

b

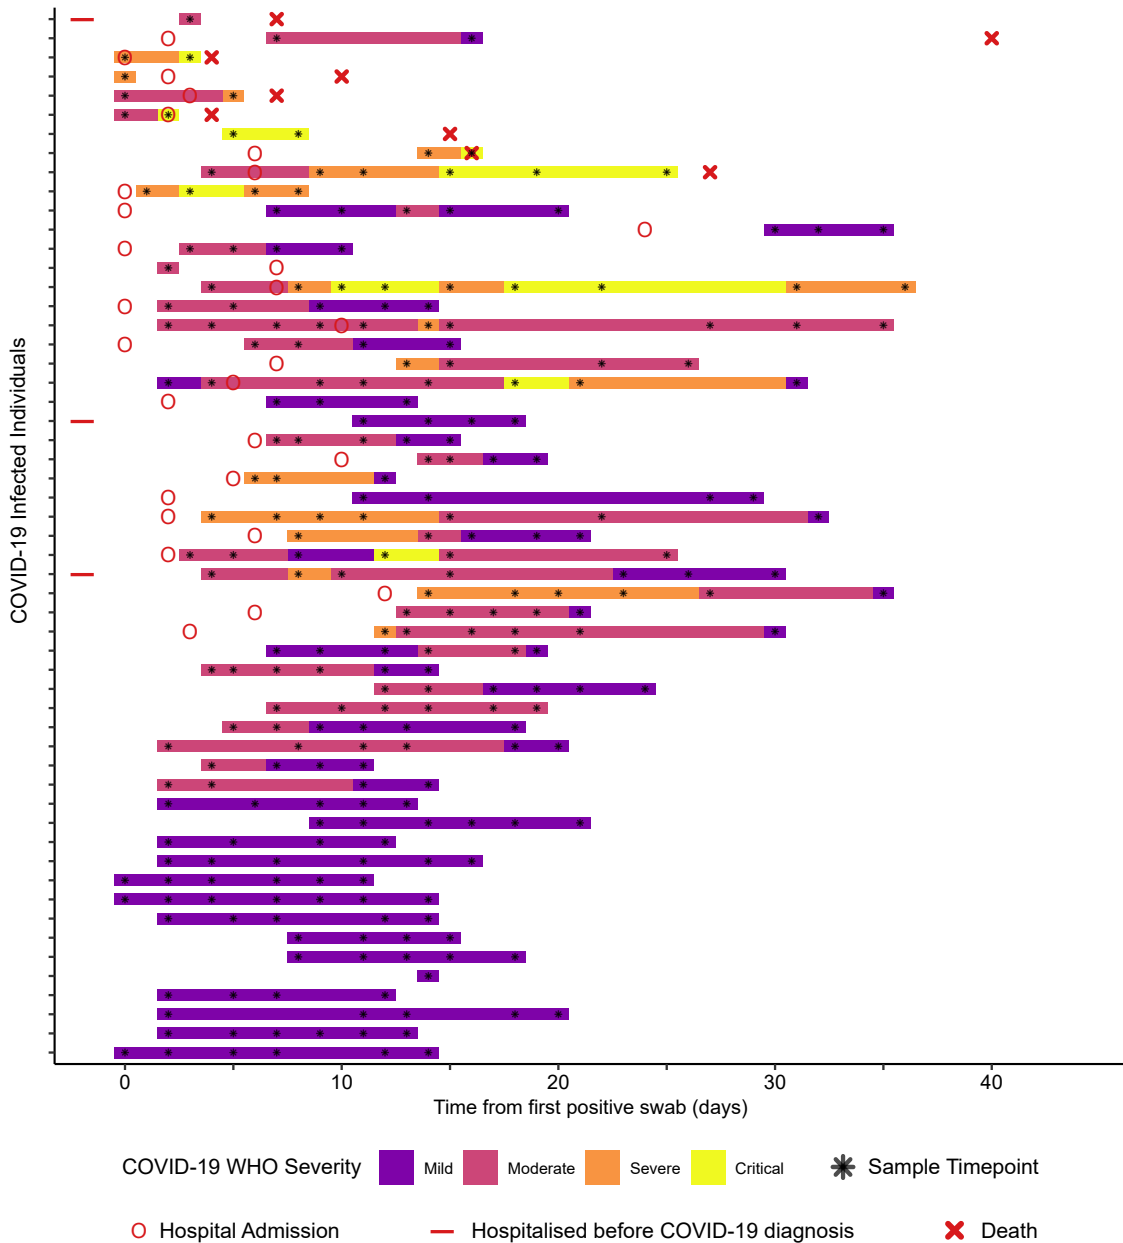

Figure 2

COVID-19 Status    ● Negative    ● Positive

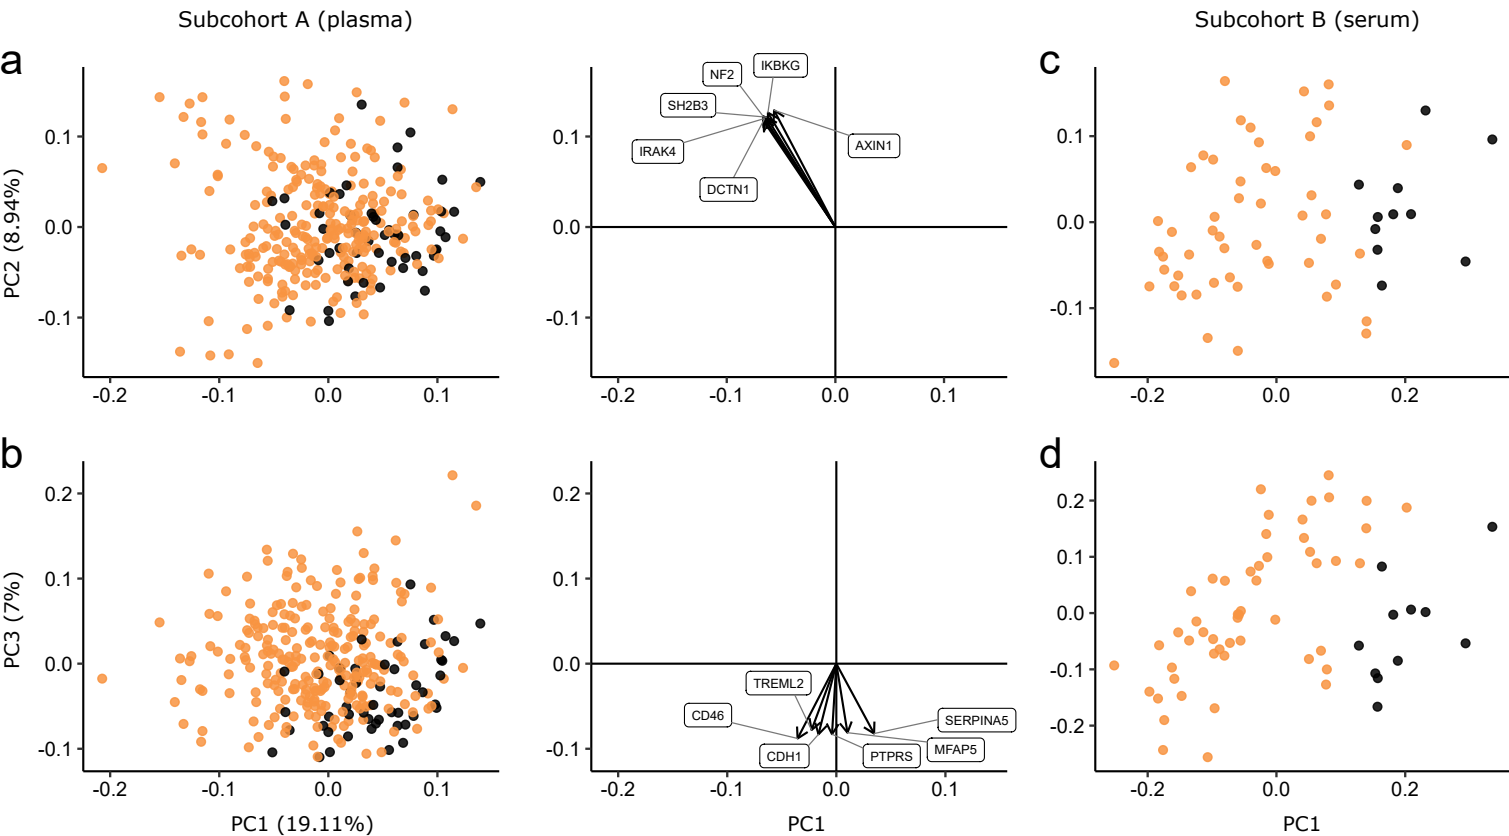

Figure 3

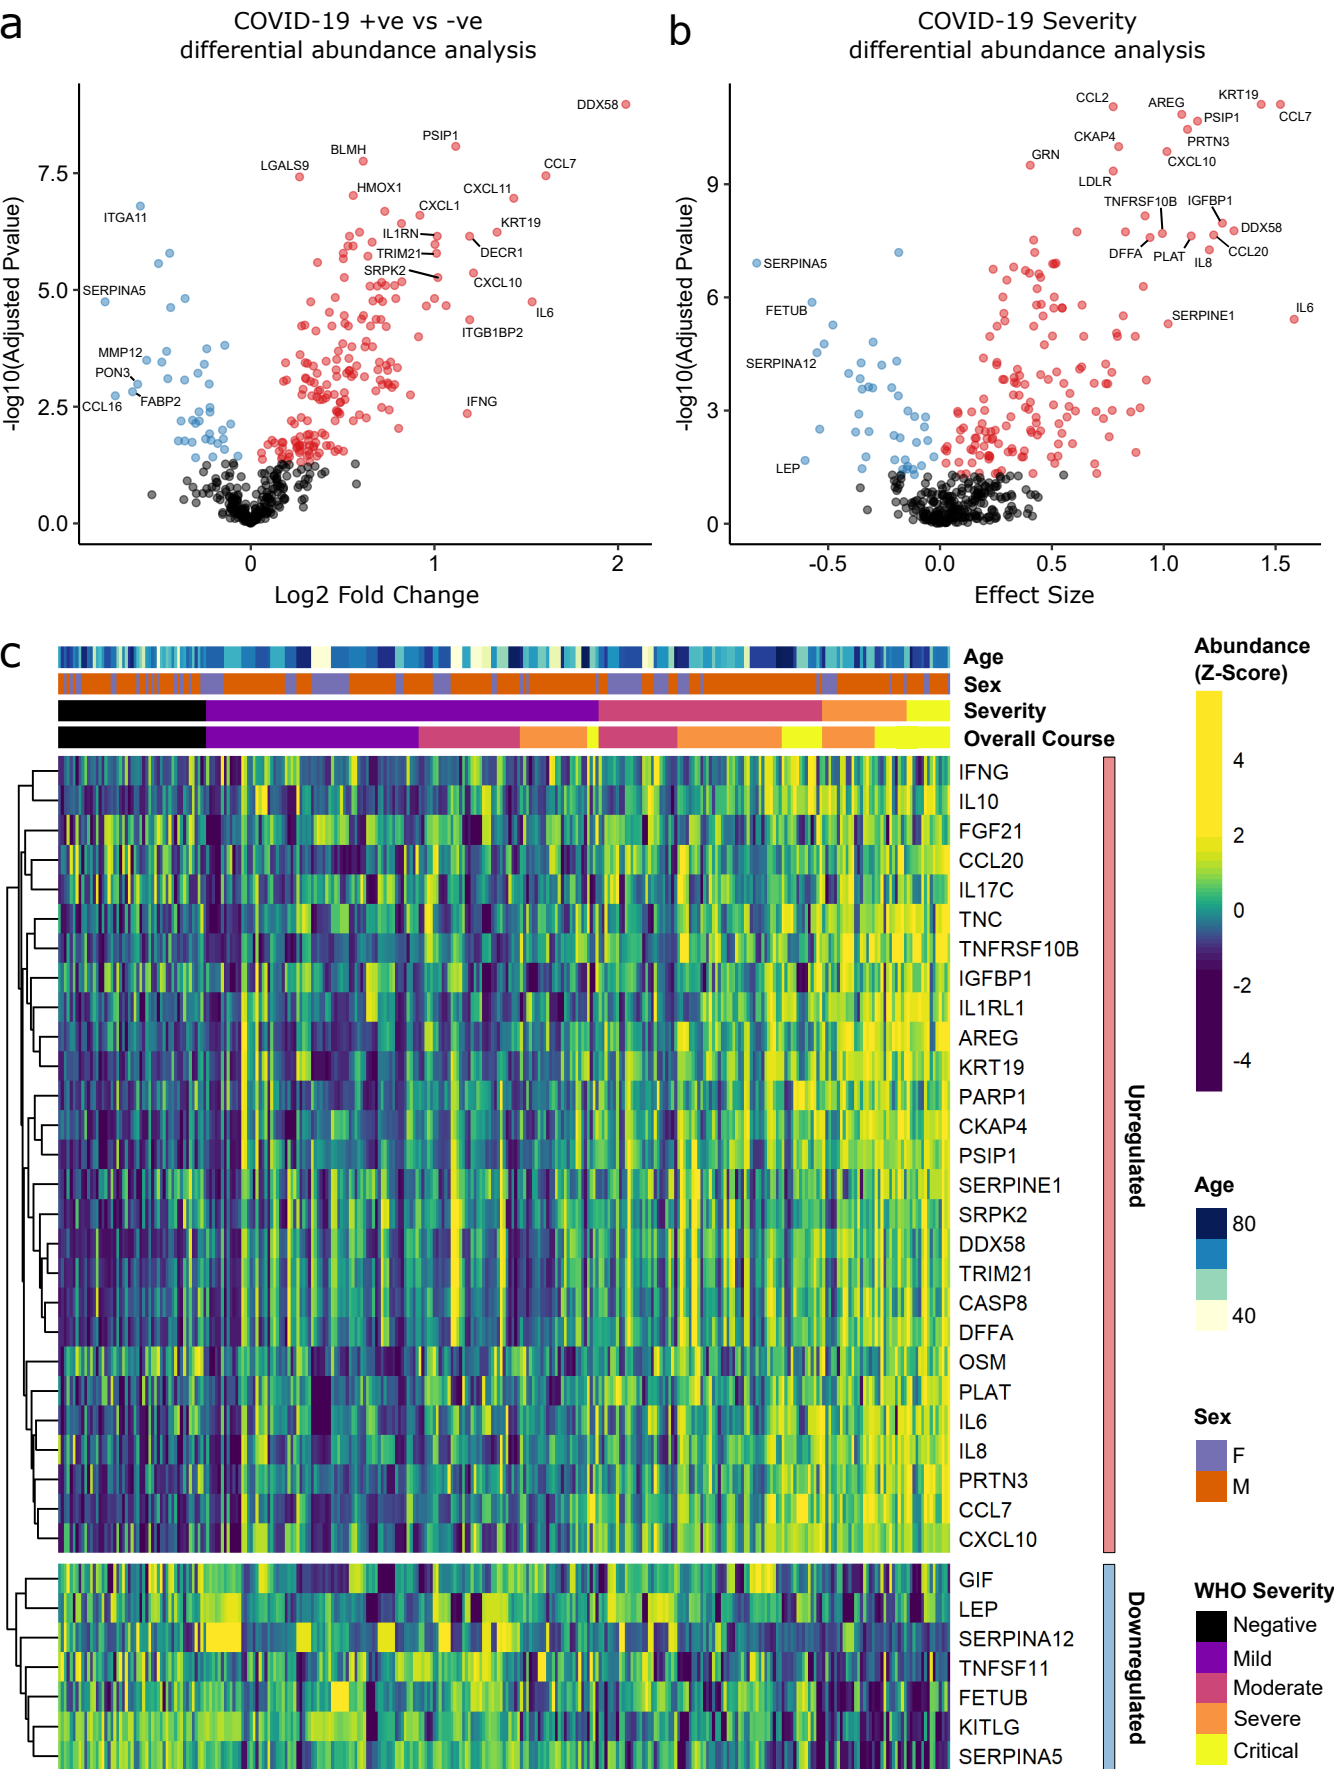

# Figure 4

**a**

Subcohort A  
COVID-19  
+ve vs -ve  
(plasma)

Subcohort B  
COVID-19  
+ve vs -ve  
(serum)

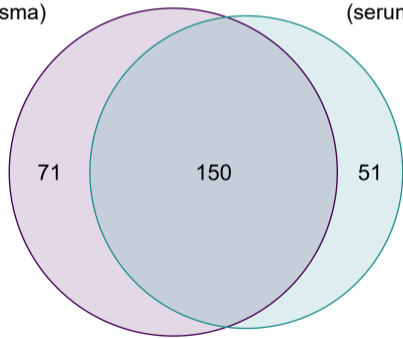

**b**

Significance ● None ● Serum only ● Plasma only ● Both

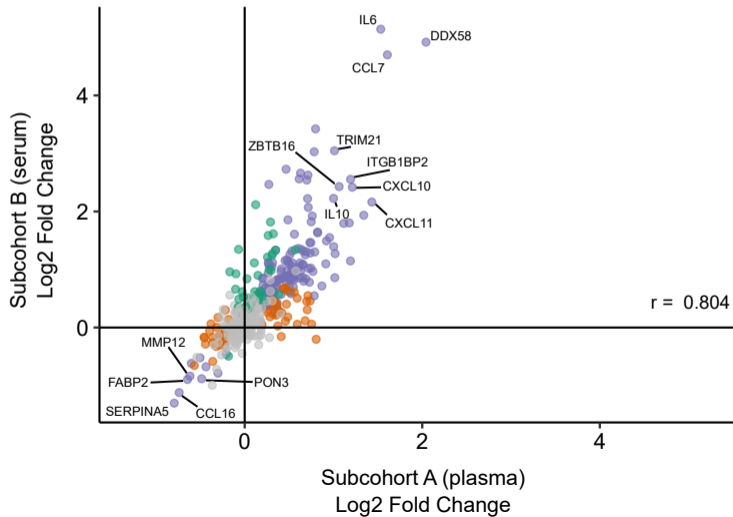



# Figure 5

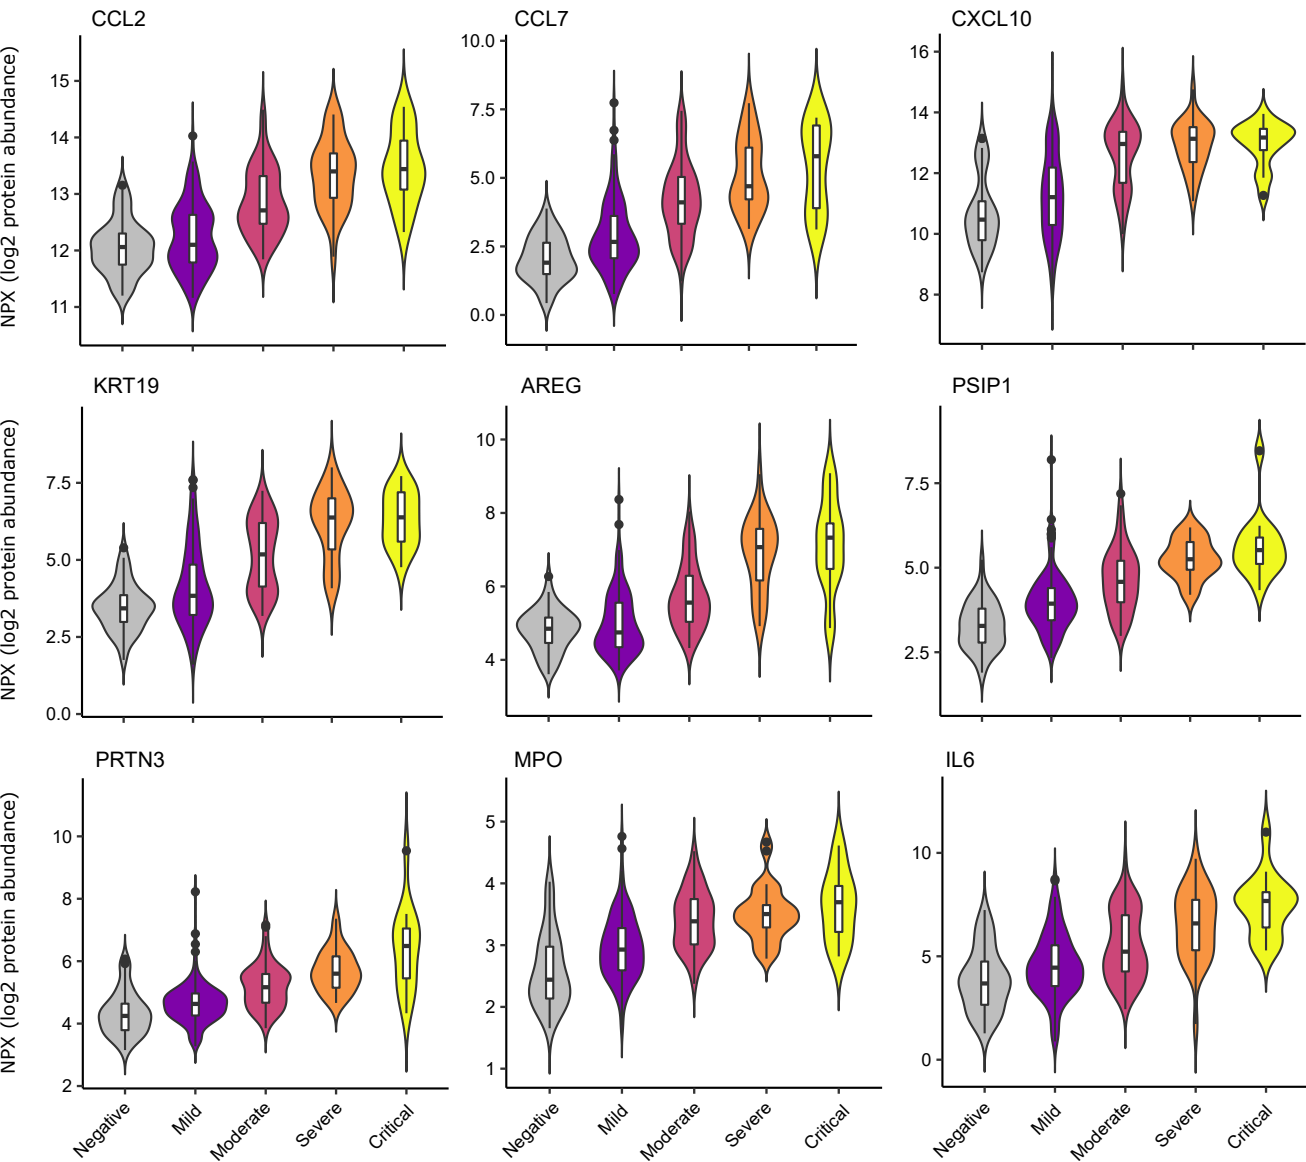

**Figure 6****a**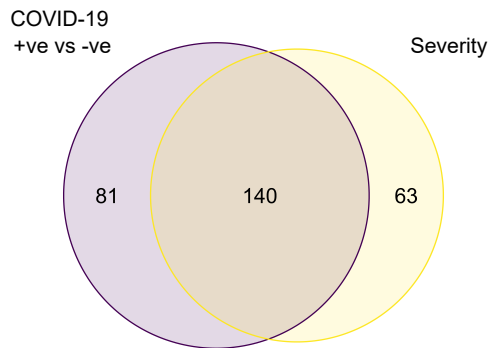**b**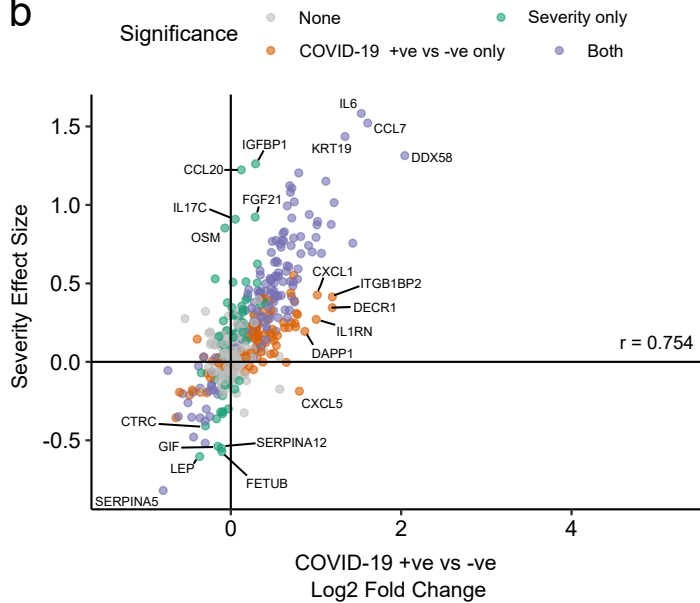**c**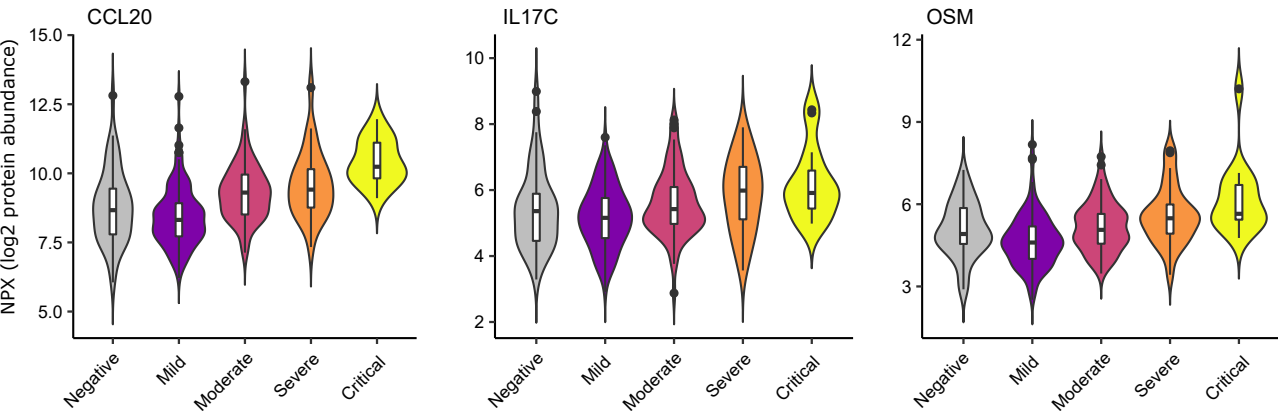

Figure 7

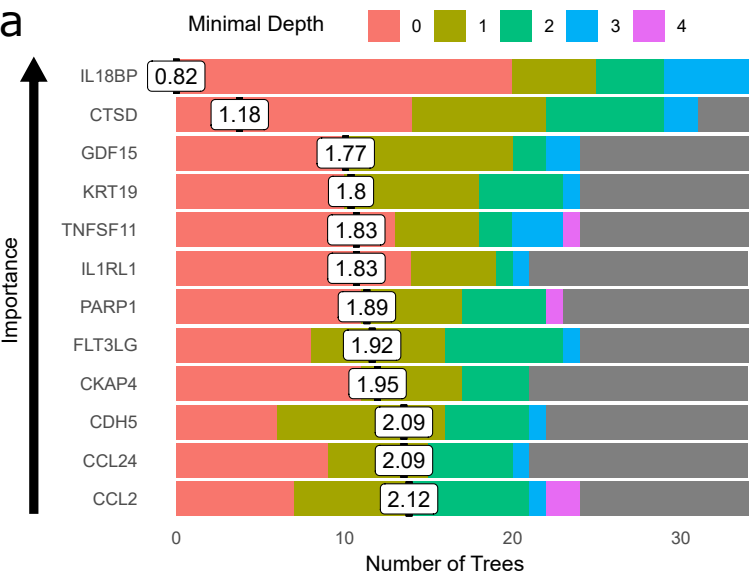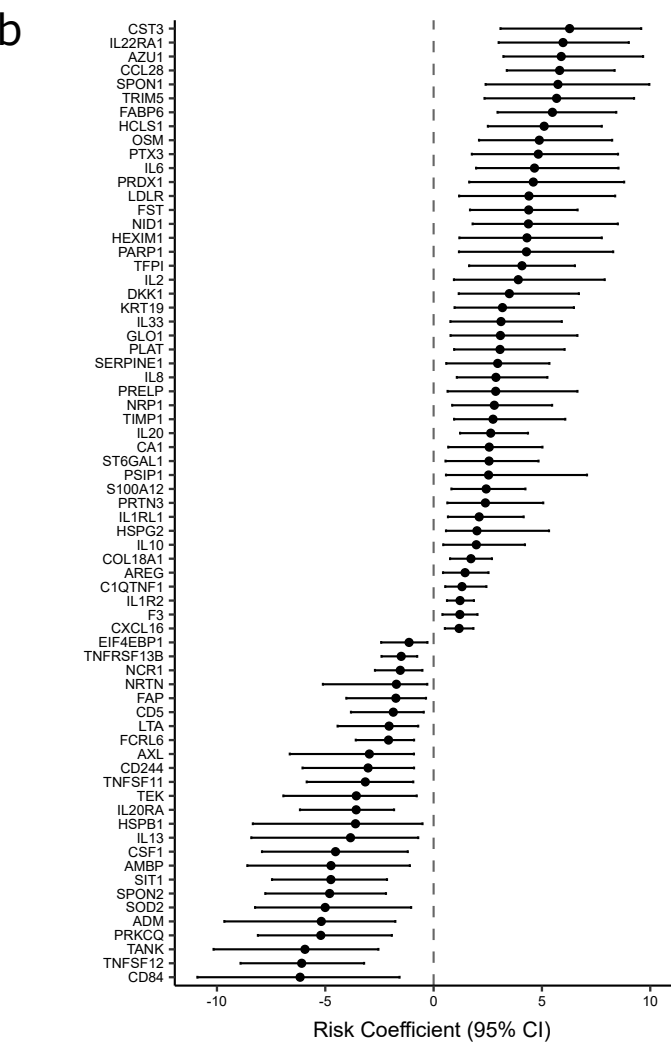

**Figure 8****Lymphocyte Count**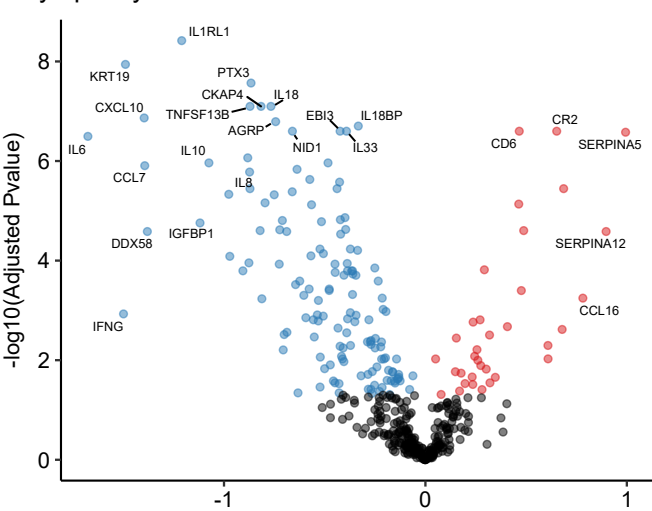**C-Reactive Protein**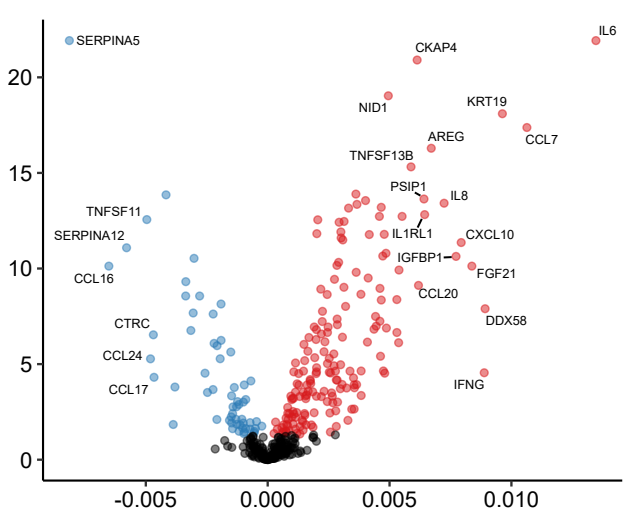**Ferritin**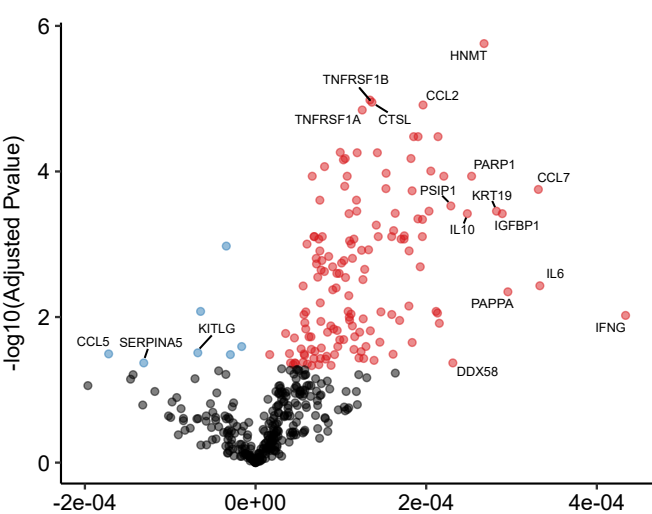**Neutrophil Count**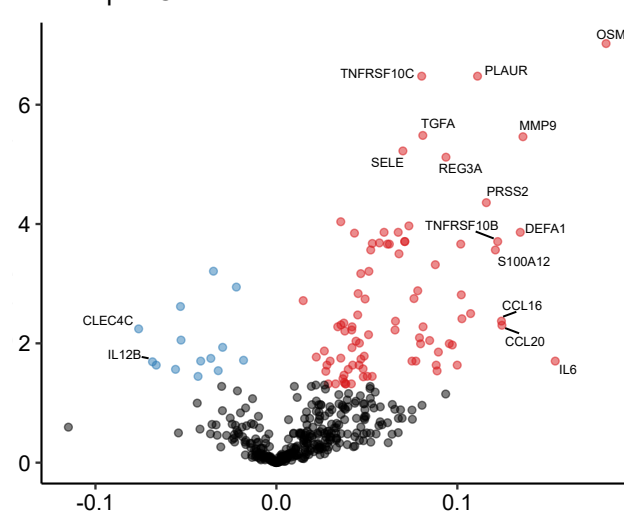**White Cell Count**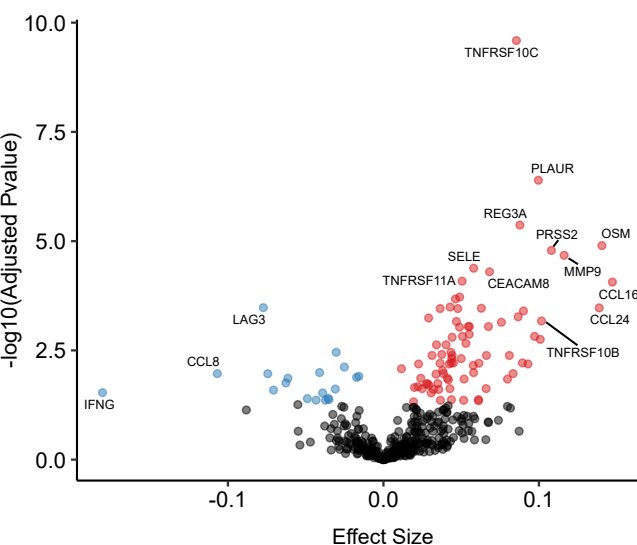**Monocyte Count**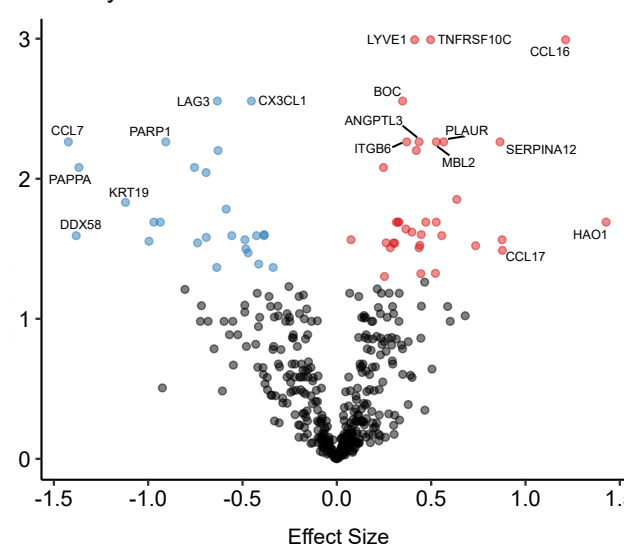

# Figure 9

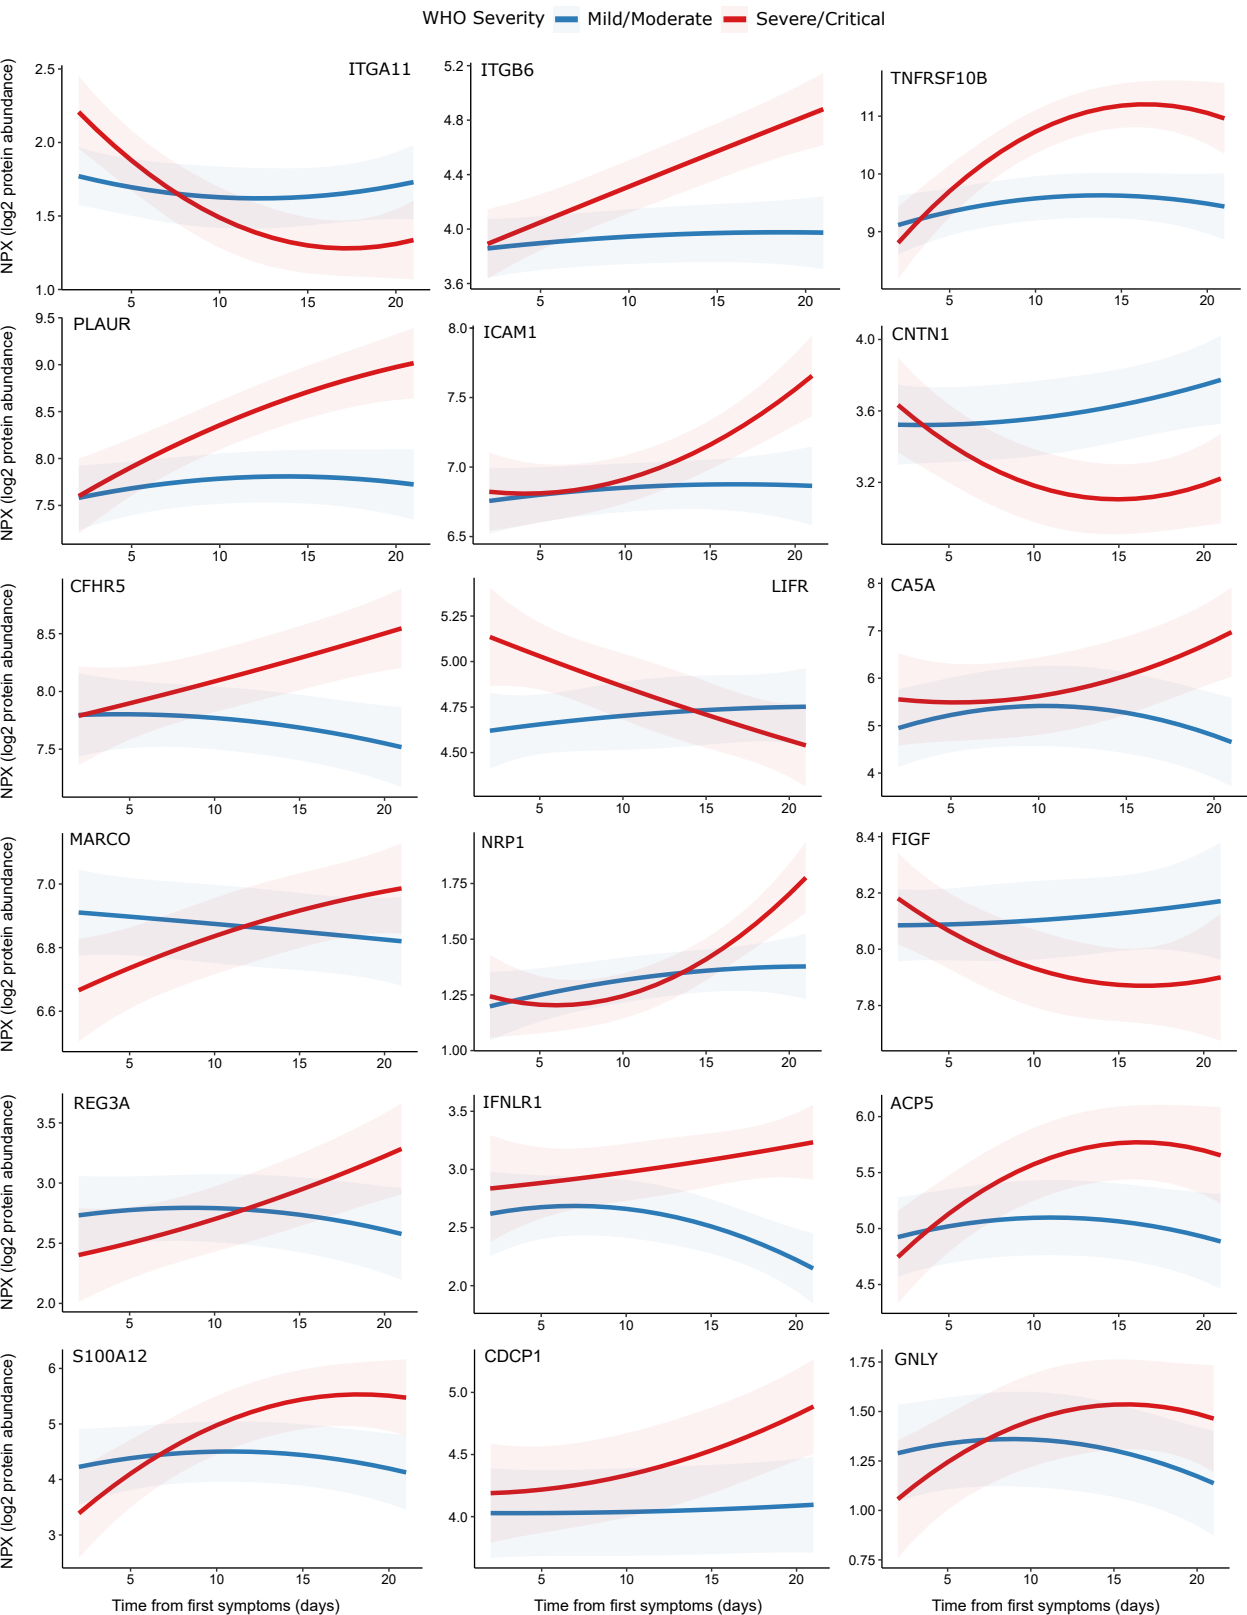

Figure 1 figure supplement 1

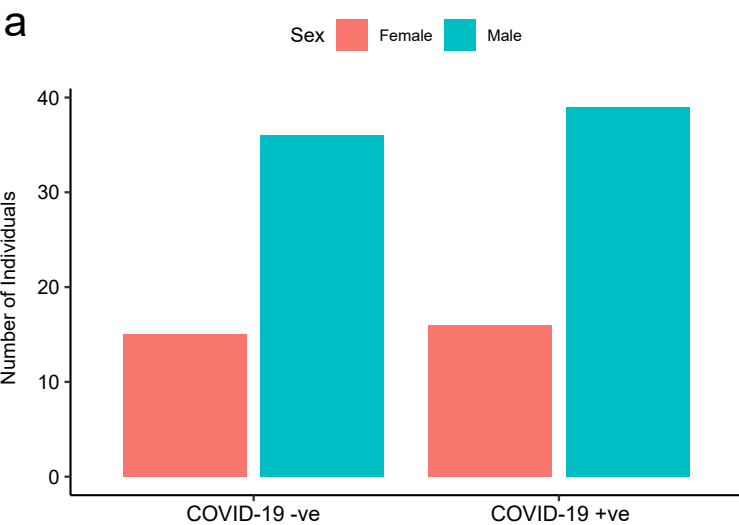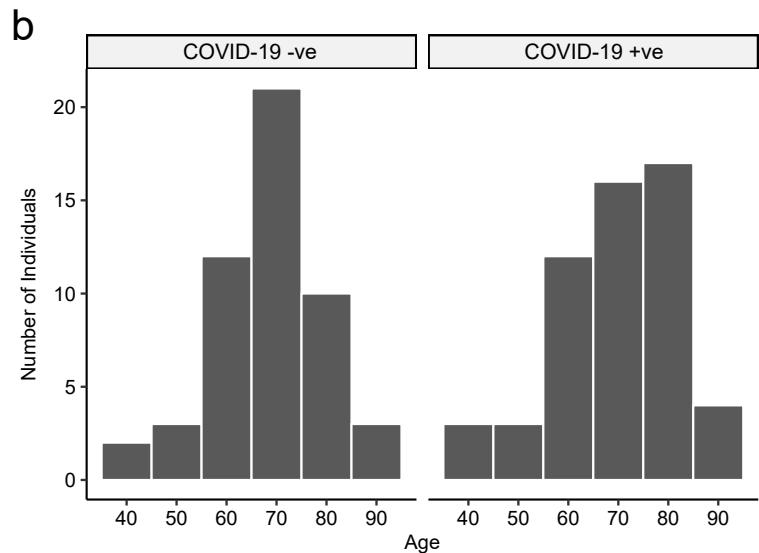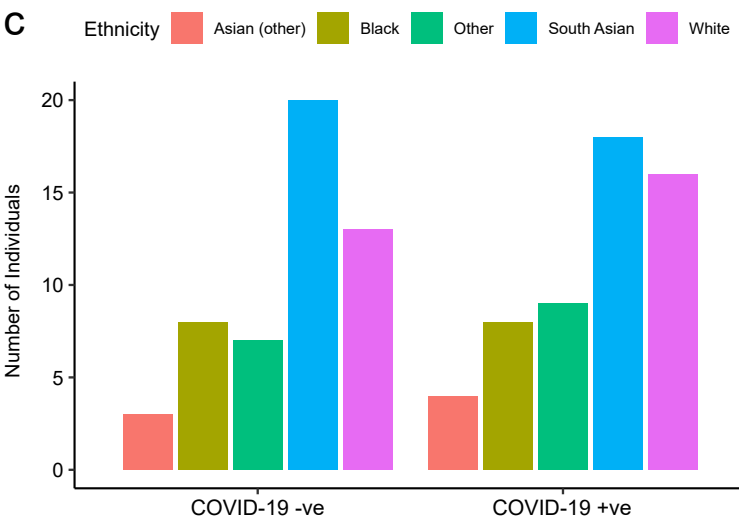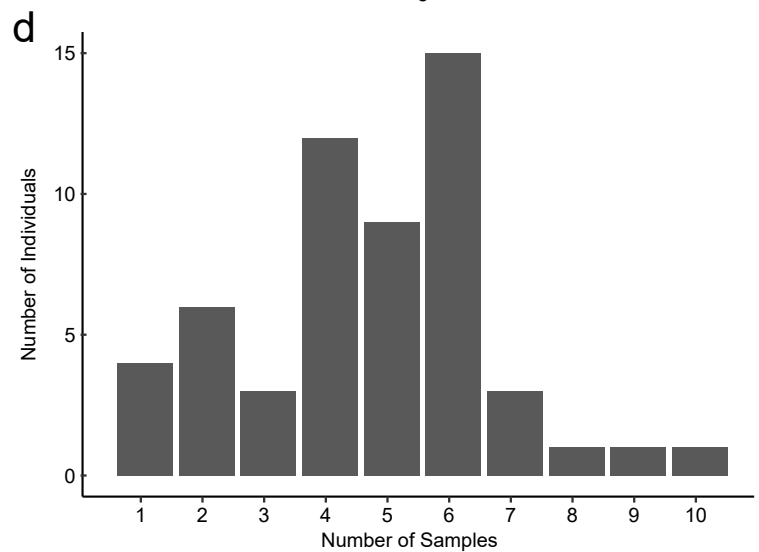

# Figure 2 figure supplement 1

## COVID-19 WHO Severity

● Negative ● Mild ● Moderate ● Severe ● Critical

**a**

Severity at time of sampling

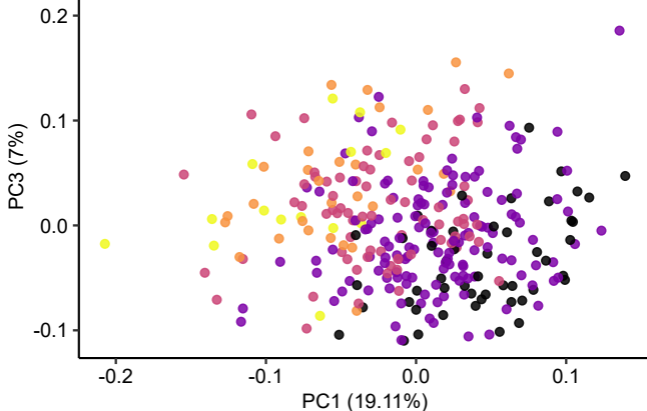

**b**

Overall clinical course

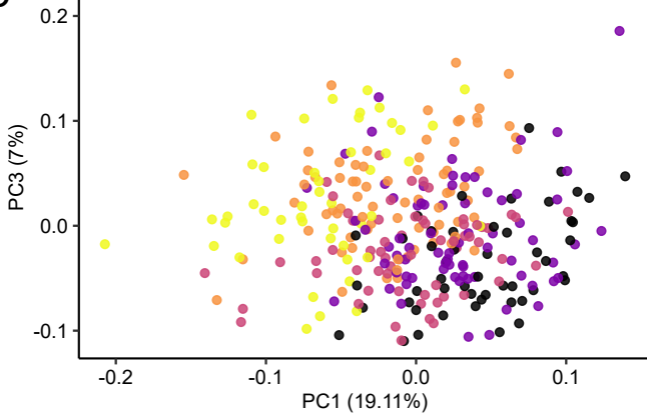

# Figure 2 figure supplement 2

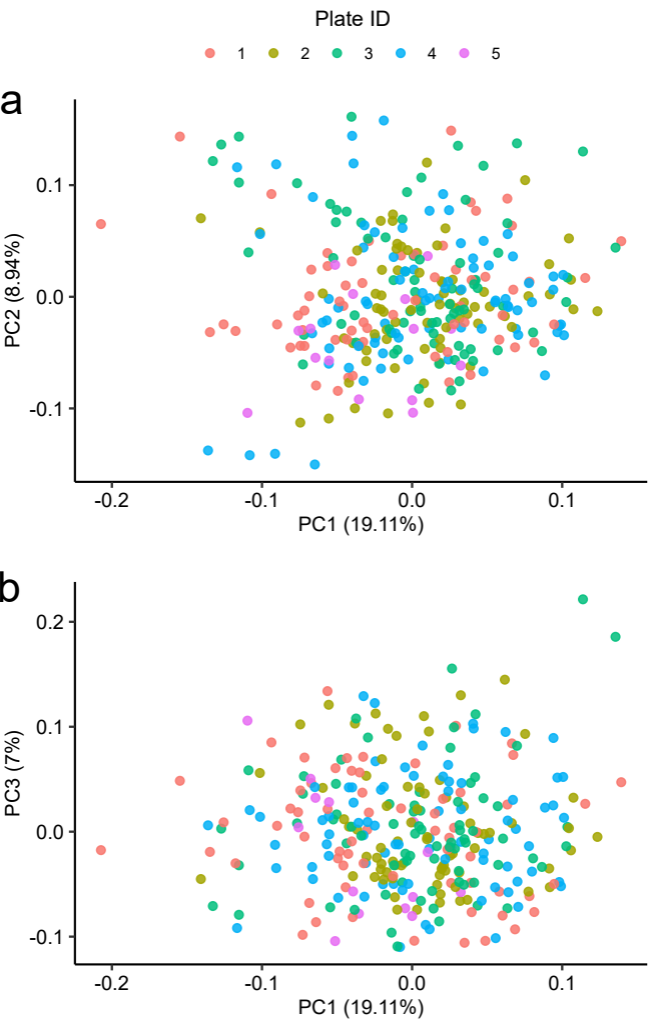



Figure 3 figure supplement 1

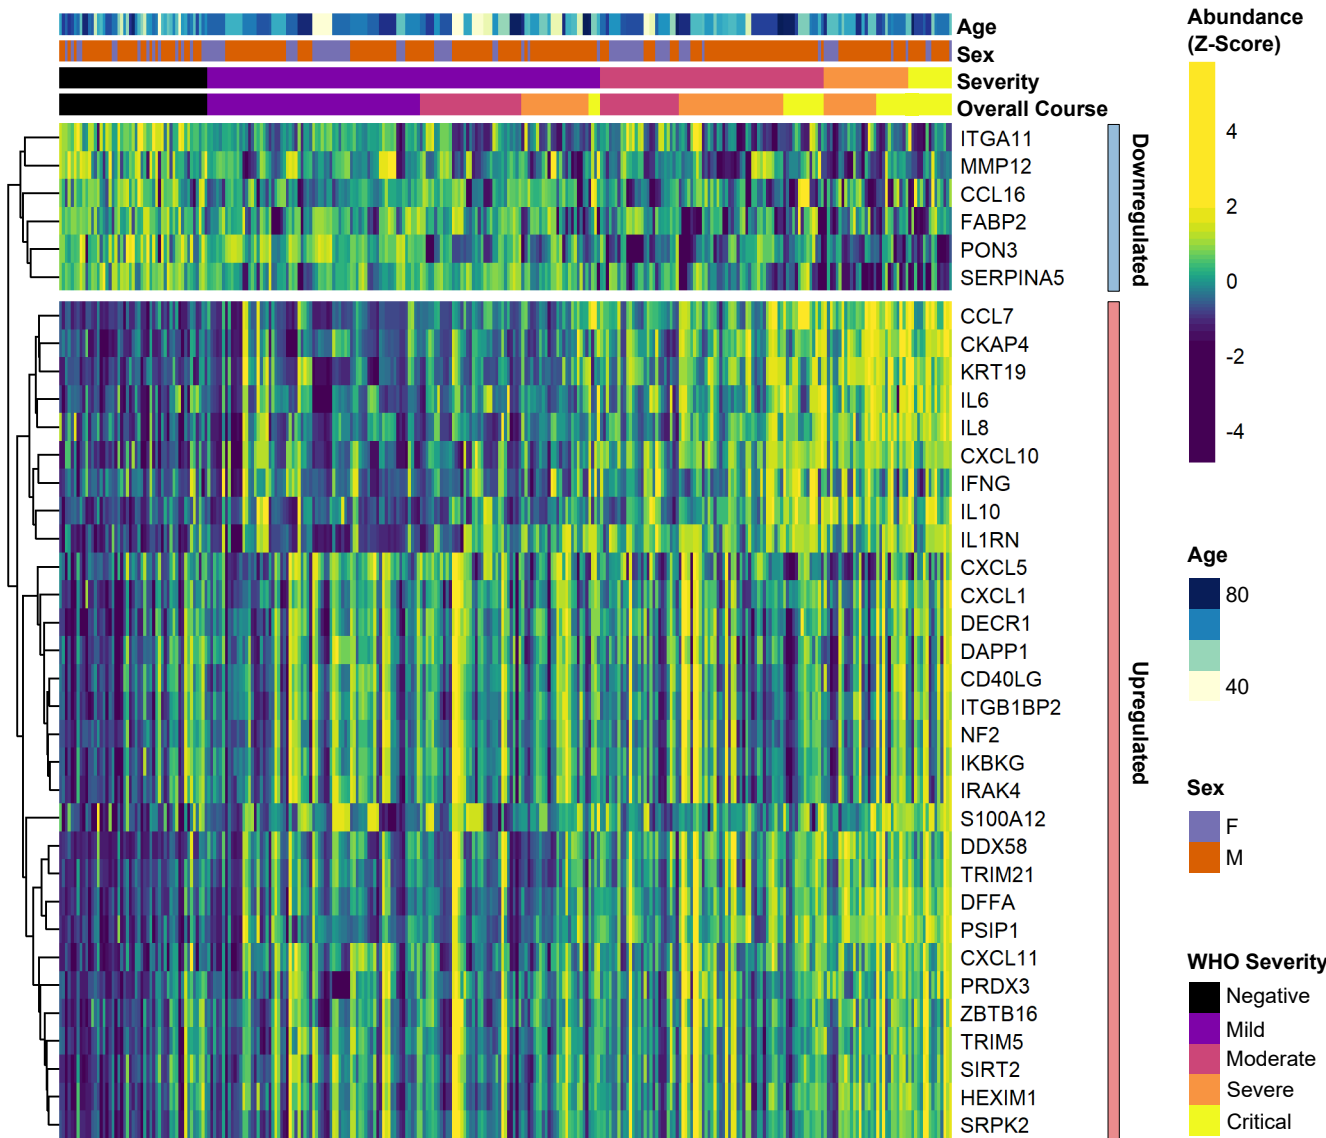

# Figure 3 figure supplement 2

**a**

COVID-19 +ve vs -ve  
differential abundance analysis

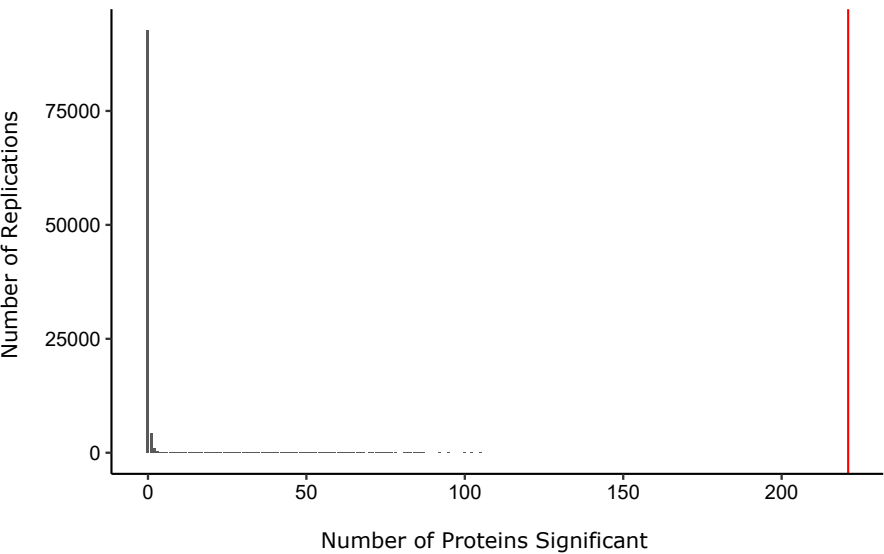

**b**

COVID-19 severity  
differential abundance analysis

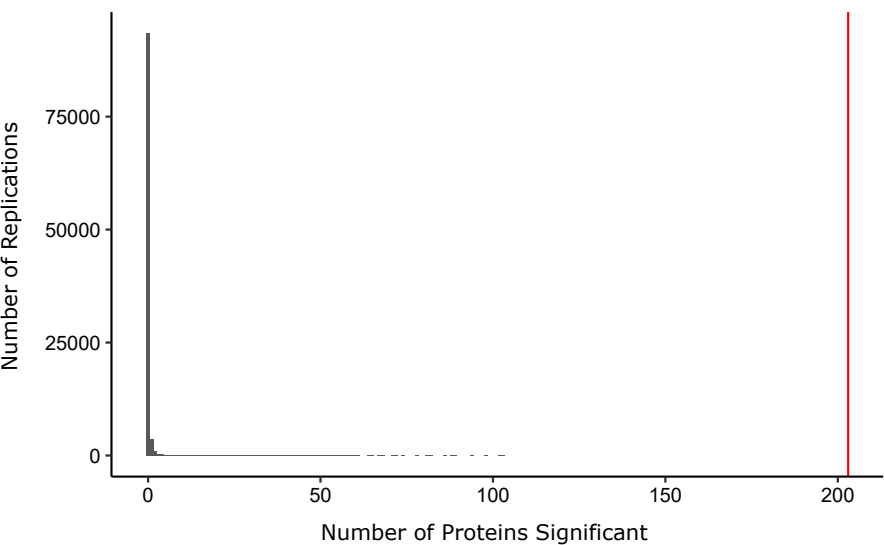

Figure 3 figure supplement 3

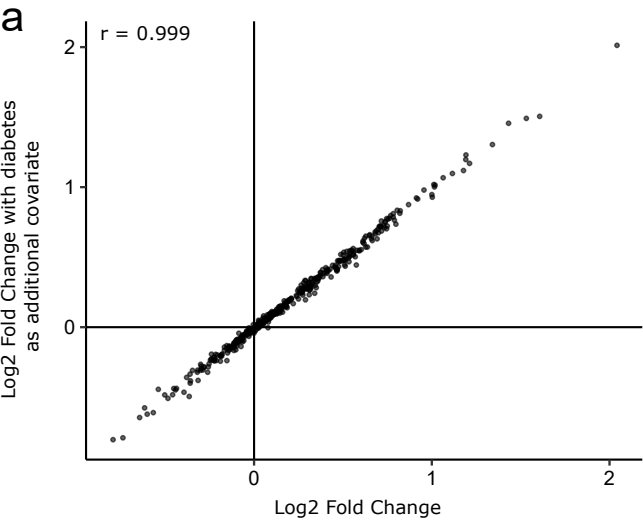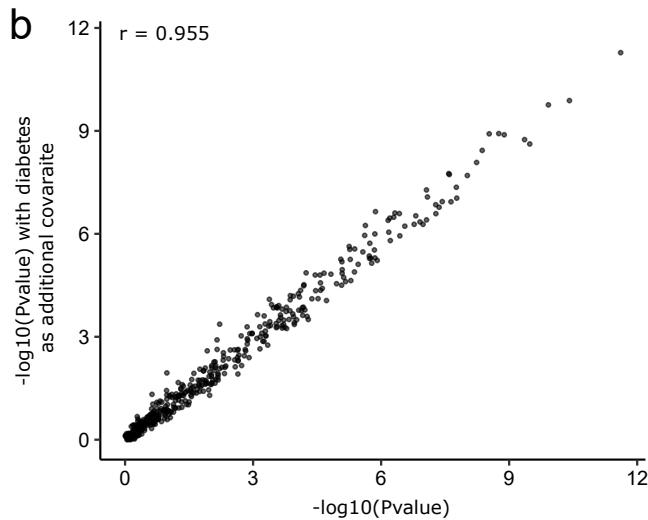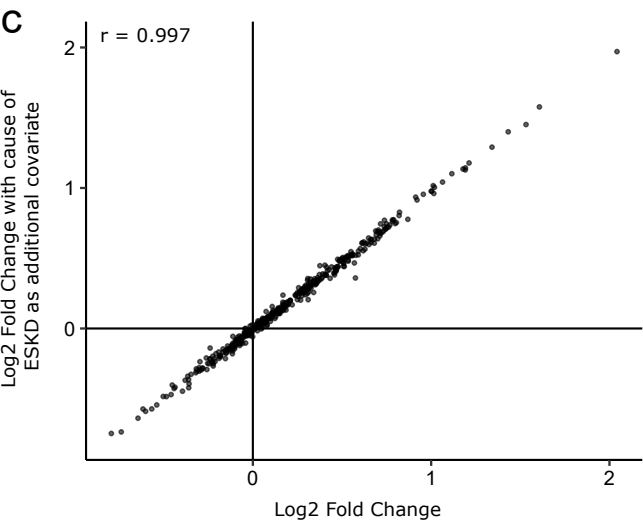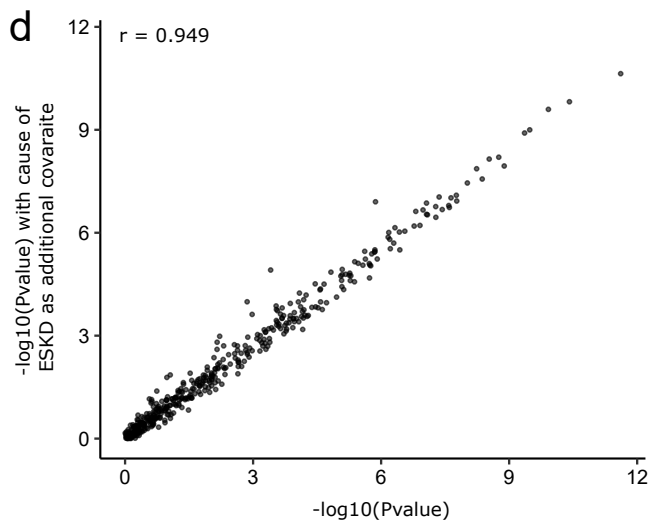

# Figure 3 figure supplement 4

## COVID-19 +ve vs -ve differential abundance analysis

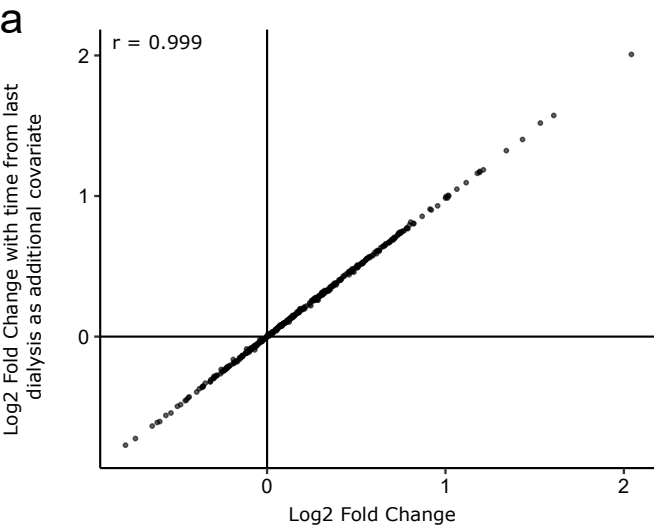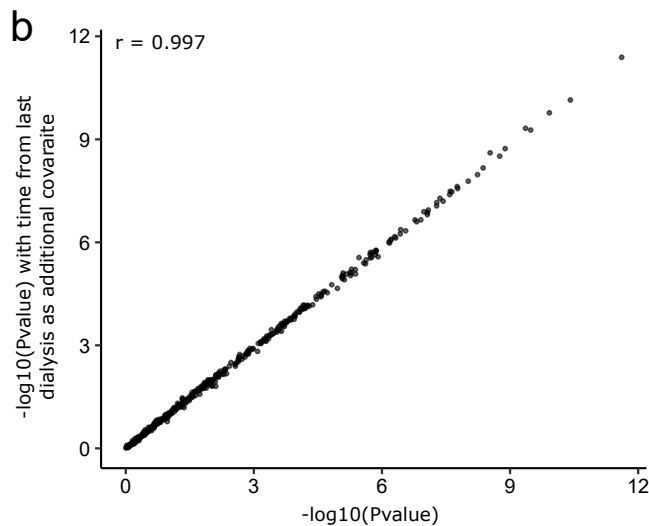

## COVID-19 Severity differential abundance analysis

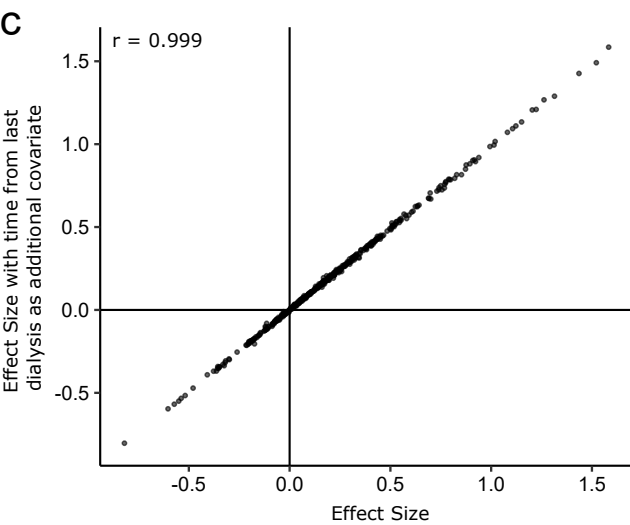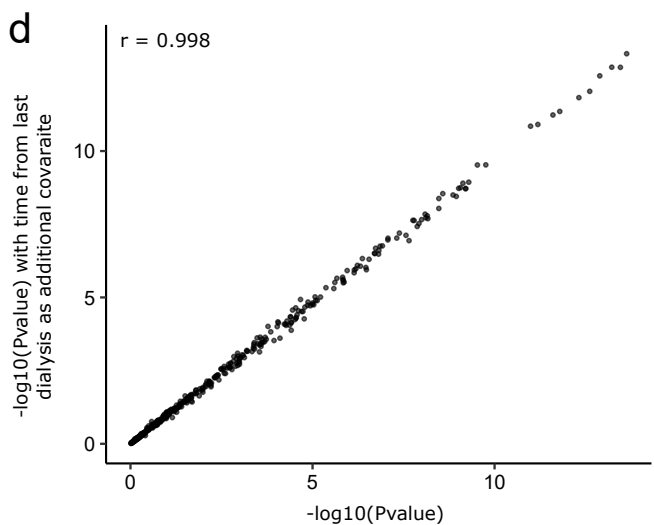

# Figure 4 figure supplement 1

Significance    ● None    ● Differential Abundance Analysis    ● *Filbin et al.*    ● Both

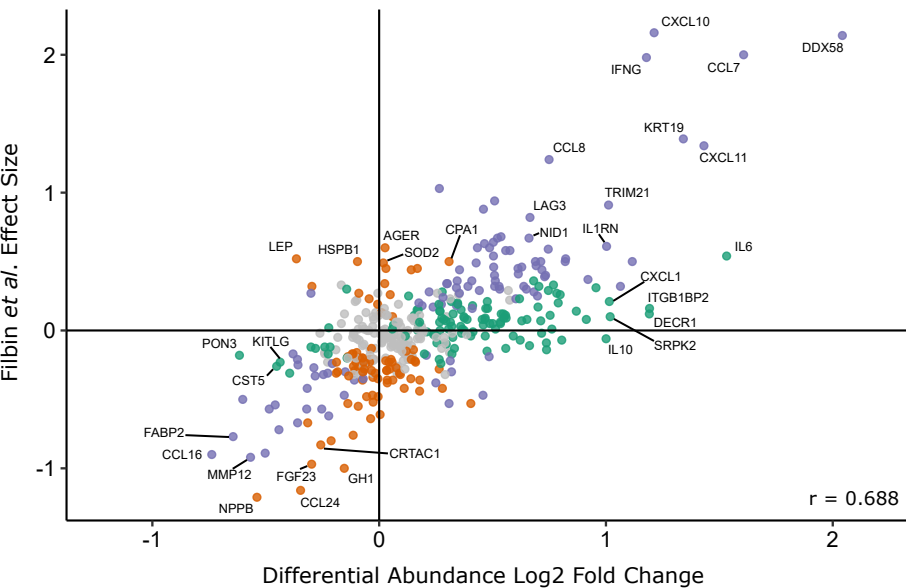

Figure 7 figure supplement 1

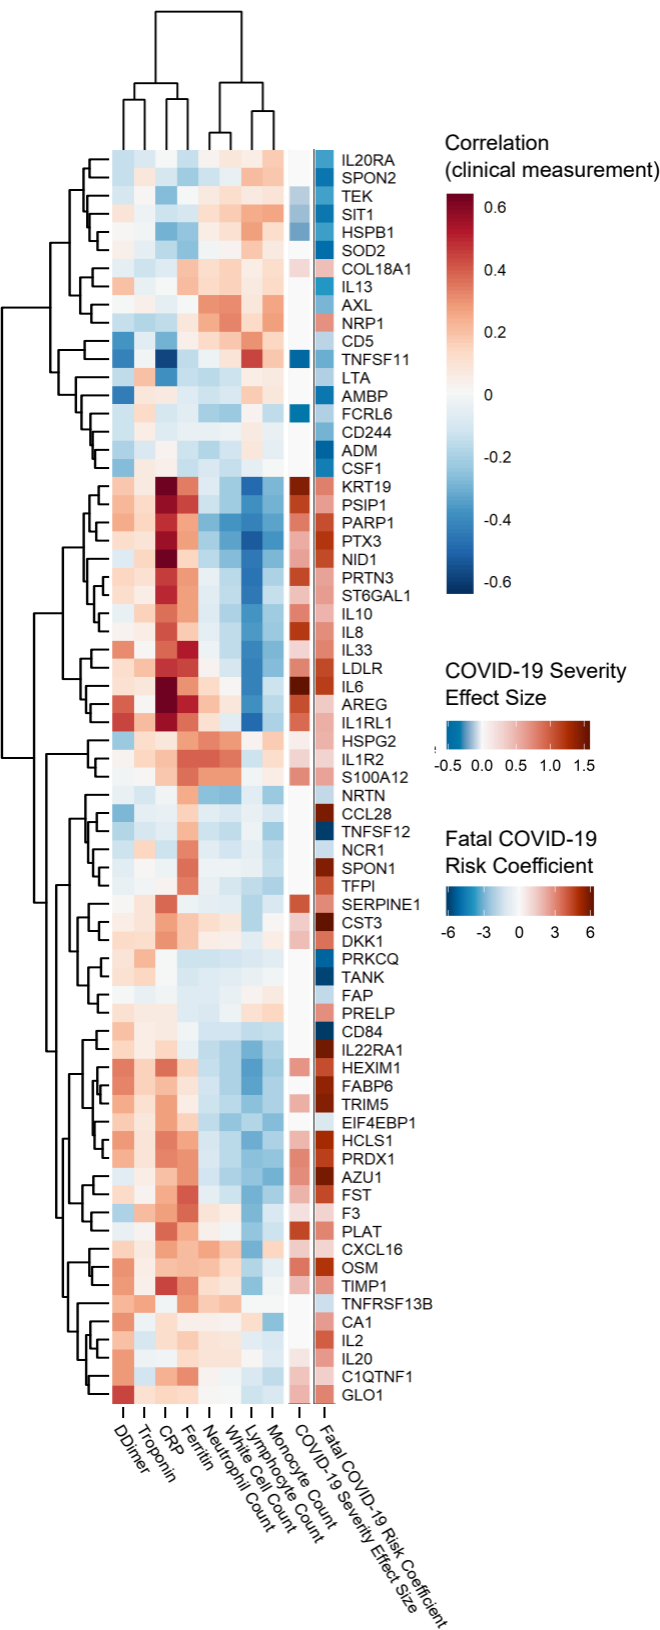

# Figure 9 figure supplement 1

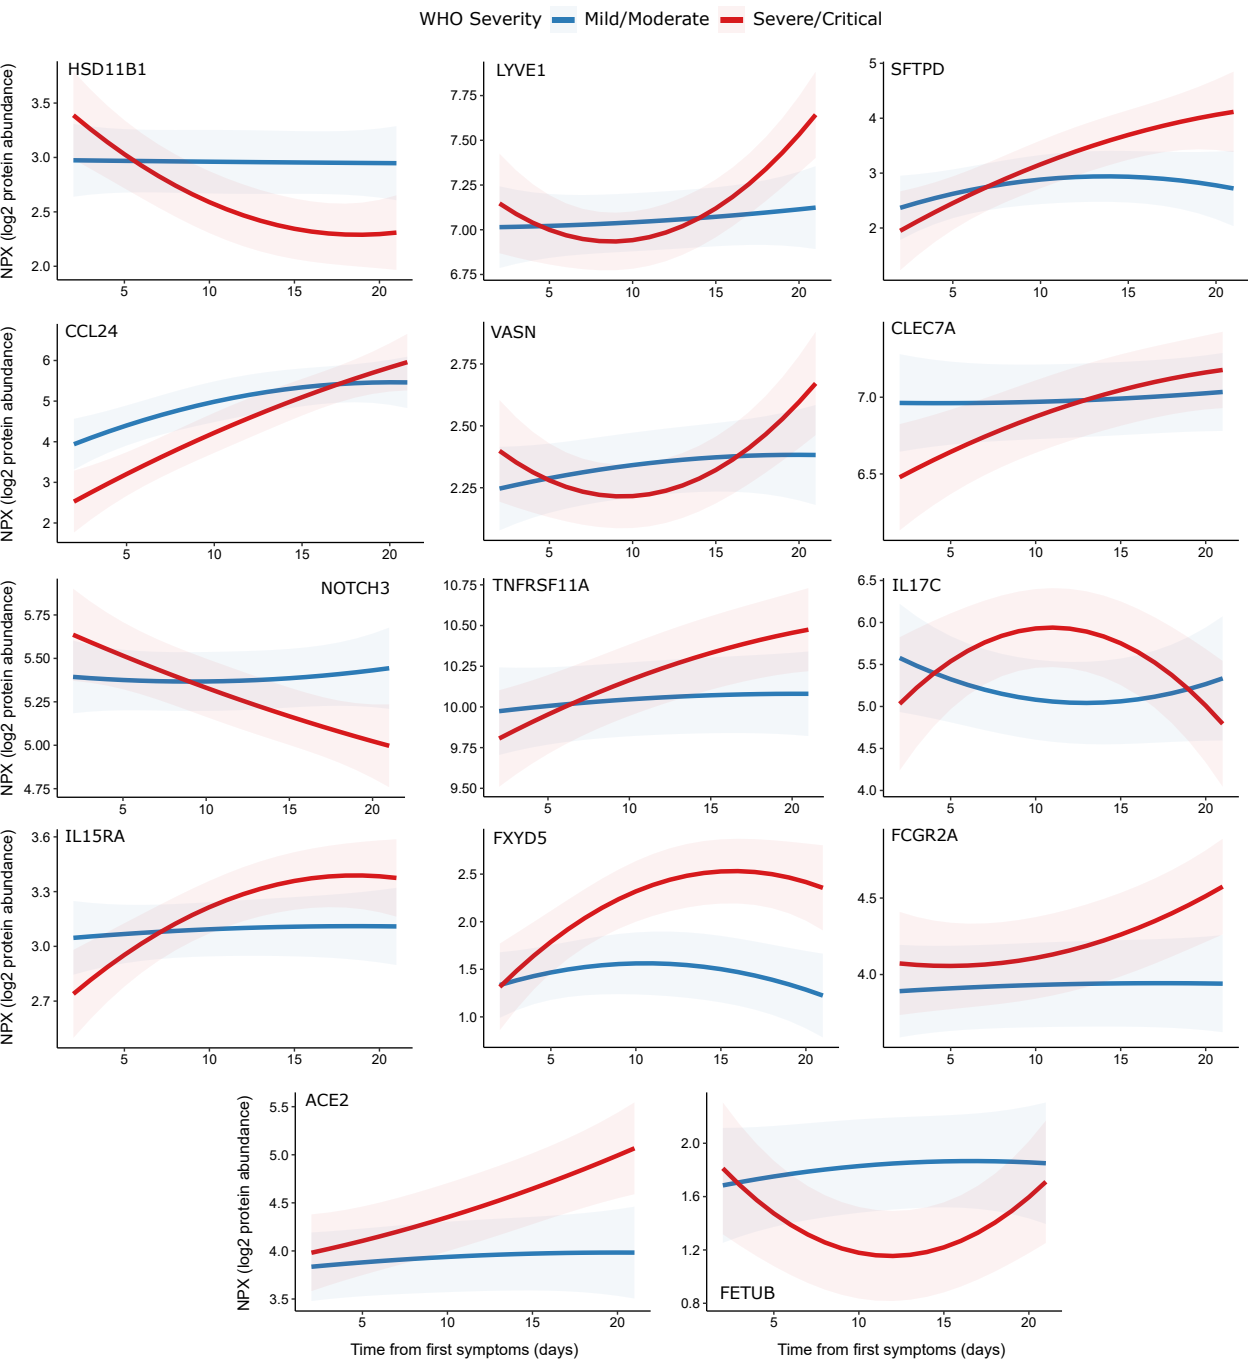

# Figure 9 figure supplement 2

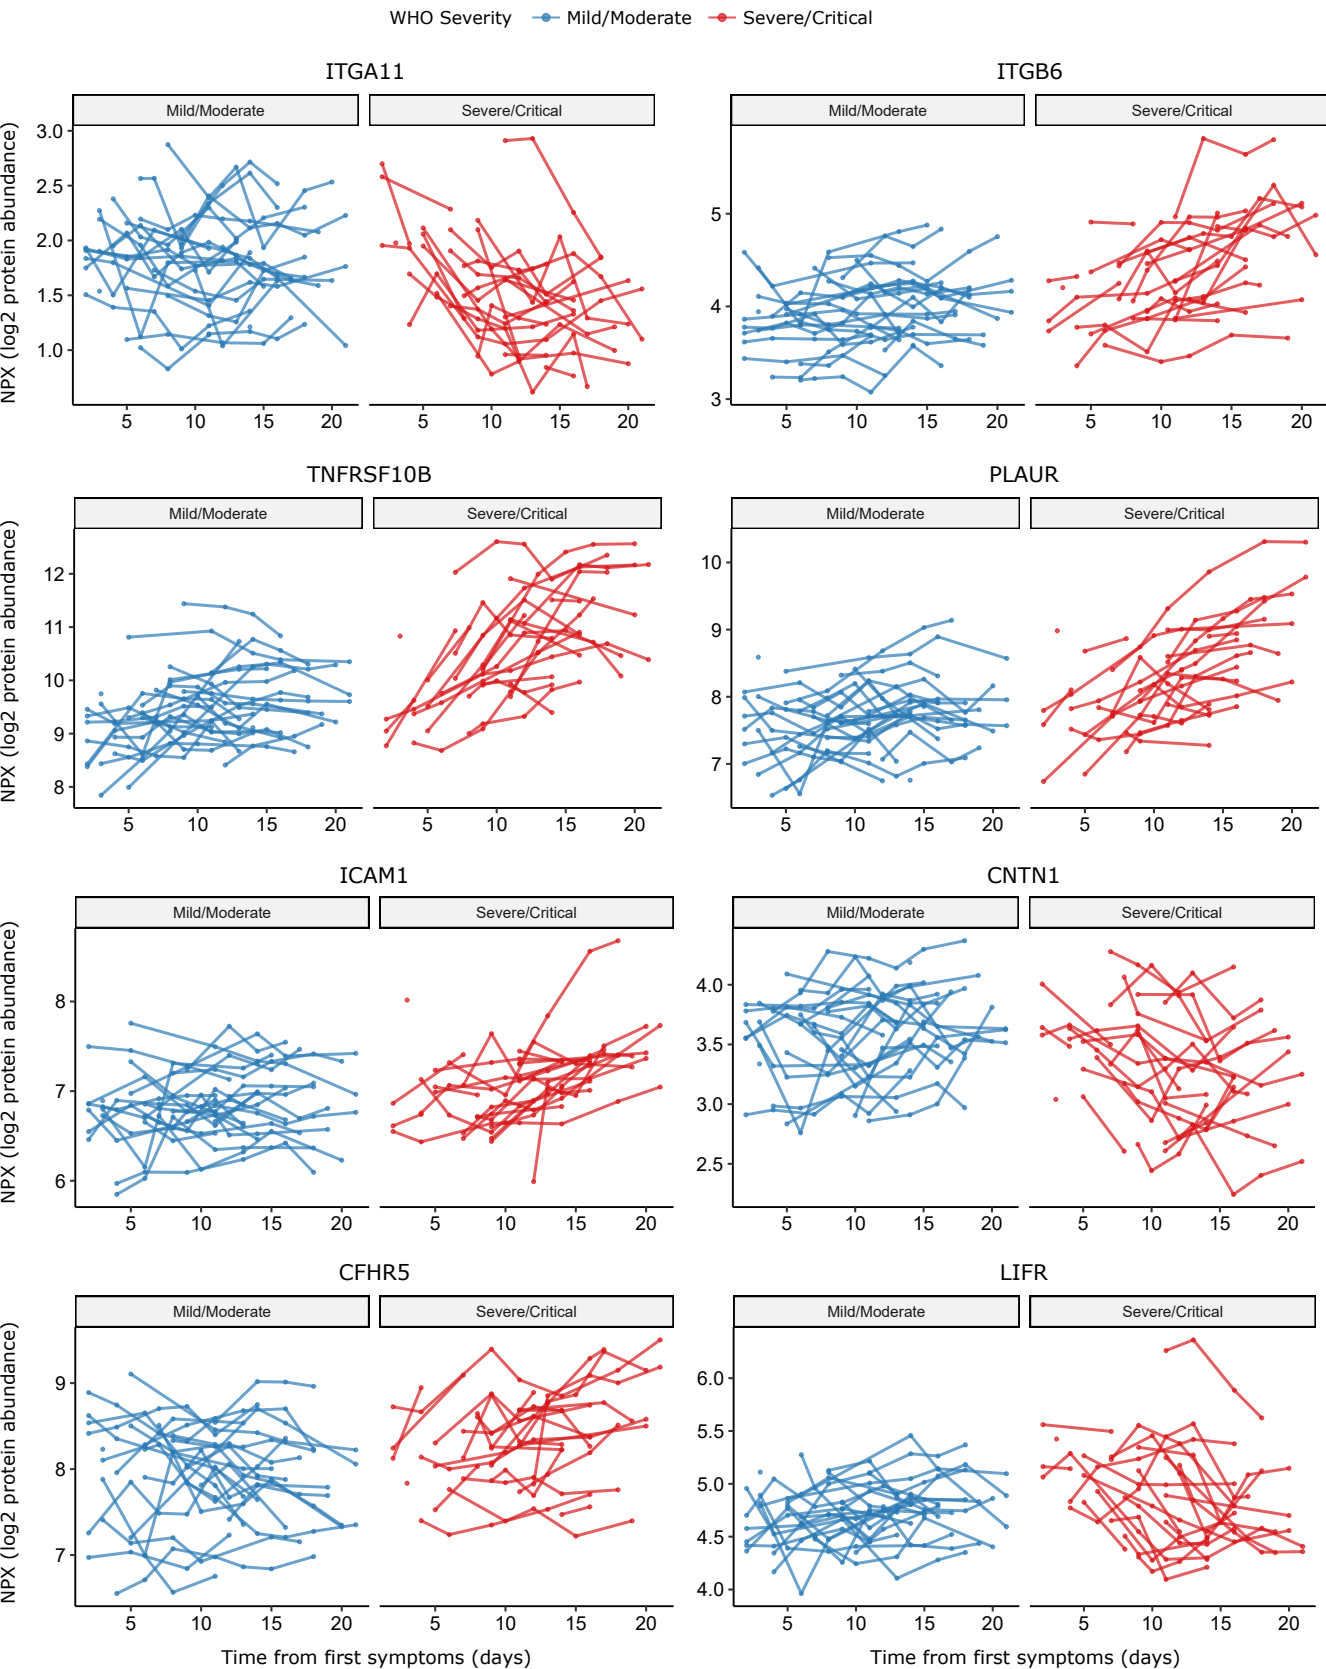

Source: https://www.medrxiv.org/content/medrxiv/early/2021/02/15/2020.11.05.20223289.full.pdf
